# Supplementary material
Source: PubMed Central journal article supplement (PMC7787219)
Supplement: NEJMoa2035389_appendix.pdf [file NEJMoa2035389_appendix.pdf]

## Supplementary Appendix

This appendix has been provided by the authors to give readers additional information about their work.

Supplement to: Baden LR, El Sahly HM, Essink B, et al. Efficacy and safety of the mRNA-1273 SARS-CoV-2 vaccine. N Engl J Med. DOI: 10.1056/NEJMoa2035389

| <b>Table of Contents</b>                                                                  | <b>Pg.</b> |
|-------------------------------------------------------------------------------------------|------------|
| COVE Study Group.....                                                                     | 2          |
| List of COVE Study Trial Investigators and Team.....                                      | 4          |
| Supplemental Statistical Methods.....                                                     | 8          |
| Fig. S1. Study Disposition in Overall Randomized Set.....                                 | 11         |
| Table S1. Primary and Secondary Objectives of the Trial.....                              | 12         |
| Table S2. Baseline Demographics and Characteristics by Randomization Strata.....          | 14         |
| Table S3. Solicited Adverse Reactions Within 7 Days After First Injection by Grade.....   | 17         |
| Table S4. Solicited Adverse Reactions Within 7 days After First Injection by Grade.....   | 19         |
| Table S5. Number of Days Reporting Solicited Adverse Reactions After First Injection..... | 21         |
| Table S6. Solicited ARs by SARS-CoV-2 Baseline Status By Grade After Vaccination 1.....   | 22         |
| Table S7. Solicited ARs by SARS-COV-2 Baseline Status By Grade After Vaccination 2.....   | 24         |
| Table S8. Unsolicited AEs 28 Days After Any Injection, Overall Safety Set.....            | 26         |
| Tables S9-11. Unsolicited AEs, Overall Safety Set.....                                    | 27         |
| Table S12. Unsolicited Adverse Events of Hypersensitivity, Overall Safety Set.....        | 31         |
| Table S13. Covid-19 Symptoms and Severity.....                                            | 32         |
| Table S14. Characteristics of Participants with Severe Covid-19.....                      | 33         |
| Table S15. Serious and Severe Treatment-Related AEs Up to 28 Days After Any Injection...  | 34         |
| Table S16. Efficacy of Key Secondary Endpoints.....                                       | 35         |
| Table S17. Vaccine Efficacy by SARS-COV-2 Status.....                                     | 36         |
| Table S18. Preliminary Analysis of Infection from Randomization.....                      | 37         |

**COVE Study Group (pubmed listed, and ordered alphabetically by institution affiliation)**

| <b>Affiliation/Funding*</b>                                                     | <b>Study Group</b>                                                                                                                                        | <b>Location</b>      |
|---------------------------------------------------------------------------------|-----------------------------------------------------------------------------------------------------------------------------------------------------------|----------------------|
| AB Clinical Trials                                                              | Atoya Adams, MD, MBA                                                                                                                                      | Las Vegas, NV        |
| Accel Research Sites                                                            | Bruce G. Rankin, DO                                                                                                                                       | DeLand, FL           |
| Advanced Clinical Research                                                      | Sinikka L. Green, MD                                                                                                                                      | Cedar Park, TX       |
| Alliance for Multispecialty Research                                            | Richard M. Glover, II, MD                                                                                                                                 | Newton, KS           |
| Alliance for Multispecialty Research                                            | Terry L. Poling, MD                                                                                                                                       | Wichita, KS          |
| Alliance for Multispecialty Research                                            | William B. Smith, MD                                                                                                                                      | Knoxville, TN        |
| Baptist Health Center for Clinical Research                                     | Priyantha N. Wijewardane, MD                                                                                                                              | Little Rock, AR      |
| Baylor College of Medicine<br>NIAID 1UM1A1148575-01S2                           | Hana El Sahly, MD, Jennifer Whitaker, MD, Catherine Mary Healy, MD, Christine Akamine, MD                                                                 | Houston, TX          |
| Benchmark Research                                                              | Laurence Chu, MD                                                                                                                                          | Austin, TX           |
| Benchmark Research                                                              | Michael J. Cotugno, MD                                                                                                                                    | Metairie, LA         |
| Benchmark Research                                                              | Greg Hachigian, MD                                                                                                                                        | Sacramento, CA       |
| Benchmark Research                                                              | William Seger, MD                                                                                                                                         | Fort Worth, TX       |
| Brigham and Women's Hospital<br>NCATS UL1 RR025758 and NIAID UM1 AI069412       | Lindsey R. Baden, MD, Michael Desjardins, MD, Jennifer A Johnson, MD, Amy Sherman, MD, Stephen R Walsh, MD                                                | Boston, MA           |
| Carolina Institute for Clinical Research                                        | Judith Borger, DO                                                                                                                                         | Fayetteville, NC     |
| Centex Studies, Inc.                                                            | Joel Solis, MD                                                                                                                                            | McAllen, TX          |
| Clinical Research Atlanta                                                       | Nathan Segall, MD                                                                                                                                         | Stockbridge, GA      |
| Clinical Trials of Texas                                                        | Douglas Scott Denham, DO                                                                                                                                  | San Antonio, TX      |
| Coastal Carolina Research Center                                                | Cynthia Becher Strout, MD                                                                                                                                 | Mount Pleasant, SC   |
| Cornell Clinical Trials Unit - Weill Cornell Chelsea<br>NIAID UM1AI068619       | Kristin Marks, MS, MD, Grant Ellsworth, MD, MS                                                                                                            | New York, NY         |
| Covid19 Prevention Network, (CoVPN; NIAID-NIH)                                  | Michele P Andrasnik, Jessica G Andriesen, Gail Broder, Larry Corey, Niles Eaton, Kathy Neuzil, Huub Gelderblom, James Kublin, Nelson Michael, Merlin Robb | Seattle, WA          |
| DM Clinical Research                                                            | Vicki E. Miller, MD                                                                                                                                       | Tomball, TX          |
| Emory University - Hope Clinic<br>NIAID 3UM1AI068614-14S1                       | Colleen Kelley MD, MPH, Valeria Cantos MD, Carlos del Rio MD, Paulina Rebolledo MD                                                                        | Decatur, GA          |
| Emory University - Hope Clinic<br>NIAID 1UM1AI148576-01                         | Nadine Roupheal, Sriatha Edupuganti, Daniel Sans Graciaa, Paulina Rebolledo                                                                               | Decatur, GA          |
| Emory University School of Medicine<br>NIAID 1UM1AI148576-01                    | Evan J. Anderson, MD, Andres Camacho-Gonzalez, MD, Satoshi Kamidani, MD, Christina A. Rostad, MD, Mehgan Teherani, MD                                     | Atlanta, GA          |
| eStudySite                                                                      | Jeffrey Scott Overcash, MD                                                                                                                                | La Mesa, CA          |
| George Washington University<br>NIAID UM1AI068619                               | David Joseph Diemert, MD                                                                                                                                  | Washington, DC       |
| Hackensack University Medical Center                                            | Bindu Balani, MD                                                                                                                                          | Hackensack, NJ       |
| Henry Ford Health System                                                        | Marcus J. Zervos, MD                                                                                                                                      | Detroit, MI          |
| Hope Research Institute                                                         | Abram Burgher, MD                                                                                                                                         | Phoenix, AZ          |
| Hope Research Institute                                                         | Joseph D. Davis, MD                                                                                                                                       | Chandler, AZ         |
| Hope Research Institute                                                         | Matthew W. Doust, MD                                                                                                                                      | Phoenix, AZ          |
| J. Lewis Research                                                               | Shane Glade Christensen, MD                                                                                                                               | Salt Lake City, UT   |
| J. Lewis Research                                                               | James Todd Peterson, MD                                                                                                                                   | Salt Lake City, UT   |
| Jacksonville Center For Clinical Research                                       | Michael J. Koren, MD                                                                                                                                      | Jacksonville, FL     |
| Javara                                                                          | Christina Kennelly, MD                                                                                                                                    | Charlotte, NC        |
| Johnson County Clin-Trials                                                      | Carlos A. Fierro, MD                                                                                                                                      | Lenexa, KS           |
| Kaiser Permanente Washington Health Research Institute<br>NIAID 1UM1AI148373-01 | Lisa A. Jackson, MD, MPH                                                                                                                                  | Seattle, WA          |
| Laguna Clinical Research Associates                                             | Milton Haber, MD                                                                                                                                          | Laredo, TX           |
| Lynn Health Science Institute                                                   | Carl P. Griffin, MD                                                                                                                                       | Oklahoma City, OK    |
| Lynn Institute of the Rockies                                                   | Ripley R. Hollister, MD                                                                                                                                   | Colorado Springs, CO |
| M3 Wake Research                                                                | Wayne Lee Harper, MD                                                                                                                                      | Raleigh, NC          |
| MediSync Clinical Research Hattiesburg Clinic                                   | Rambod Rouhbakhsh, MD, MBA                                                                                                                                | Petal, MS            |
| Meridian Clinical Research                                                      | Shishir Kumar Khetan, MD                                                                                                                                  | Rockville, MD        |
| Meridian Clinical Research                                                      | Paul Simon Bradley, MD                                                                                                                                    | Savannah, GA         |
| Meridian Clinical Research                                                      | Adam Benson Brosz, MD                                                                                                                                     | Grand Island, NE     |
| Meridian Clinical Research                                                      | Frank Steven Eder, MD                                                                                                                                     | Binghamton, NY       |
| Meridian Clinical Research                                                      | David Jon Ensz, MD                                                                                                                                        | Dakota Dunes, SD     |
| Meridian Clinical Research                                                      | Brandon James Essink, MD                                                                                                                                  | Omaha, NE            |
| Meridian Clinical Research                                                      | Keith William Vrbicky, MD                                                                                                                                 | Norfolk, NE          |
| Meridian Clinical Research                                                      | Jordan L. Whatley, MD                                                                                                                                     | Baton Rouge, LA      |
| NIH                                                                             | Mamodikoe Makhene, MD, MPH                                                                                                                                | Bethesda, MD         |
| New Horizons Clinical Research                                                  | Gregory Mark Gottschlich, MD                                                                                                                              | Cincinnati, OH       |
| Optimal Research                                                                | Murray A. Kimmel, DO                                                                                                                                      | Melbourne, FL        |
| Optimal Research                                                                | Mimi Van Der Leden, MD, PhD                                                                                                                               | Rockville, MD        |

|                                                                                                                                                                                                                                                                                                                                   |                                                                                                      |                     |
|-----------------------------------------------------------------------------------------------------------------------------------------------------------------------------------------------------------------------------------------------------------------------------------------------------------------------------------|------------------------------------------------------------------------------------------------------|---------------------|
| Optimal Research                                                                                                                                                                                                                                                                                                                  | Timothy P. Vachris, MD                                                                               | Austin, TX          |
| Palm Beach Research Center                                                                                                                                                                                                                                                                                                        | Mira Baron, MD                                                                                       | West Palm Beach, FL |
| Paradigm Clinical Research Center                                                                                                                                                                                                                                                                                                 | Jamshid Saleh, MD                                                                                    | Redding, CA         |
| Quality of Life Medical & Research Centers                                                                                                                                                                                                                                                                                        | John W. McGettigan, Jr., MD                                                                          | Tucson, AZ          |
| Rancho Paseo Medical Group                                                                                                                                                                                                                                                                                                        | Judith L. Kirstein, MD                                                                               | Banning, CA         |
| Rapid Medical Research                                                                                                                                                                                                                                                                                                            | Mary Beth Manning, MD                                                                                | Cleveland, OH       |
| Research Centers of America                                                                                                                                                                                                                                                                                                       | Howard I. Schwartz, MD                                                                               | Hollywood, FL       |
| Rutgers New Jersey Medical School<br>NIAID UM1AI068619                                                                                                                                                                                                                                                                            | Shobha Swaminathan, MD, Amesika Nyaku, MD, MS                                                        | Newark, NJ          |
| Saint Louis University<br>NIAID 1UM1AI148685-01                                                                                                                                                                                                                                                                                   | Sharon E. Frey, MD                                                                                   | St. Louis, MO       |
| St. Vincent's Health System                                                                                                                                                                                                                                                                                                       | Leland N. Allen III, MD                                                                              | Birmingham, AL      |
| Suncoast Research Group                                                                                                                                                                                                                                                                                                           | Mark E. Kutner, MD                                                                                   | Miami, FL           |
| Suncoast Research Group                                                                                                                                                                                                                                                                                                           | Larkin T. Wadsworth III, MD                                                                          | St. Louis, MO       |
| Synexus Clinical Research                                                                                                                                                                                                                                                                                                         | Michael Ryan Adams, MD                                                                               | Murray, UT          |
| Synexus Clinical Research                                                                                                                                                                                                                                                                                                         | Joseph Lee Newberg, MD                                                                               | Chicago, IL         |
| Synexus Clinical Research                                                                                                                                                                                                                                                                                                         | Paul Joseph Nugent, DO                                                                               | Cincinnati, OH      |
| Synexus Clinical Research                                                                                                                                                                                                                                                                                                         | Michele Diane Reynolds, MD                                                                           | Dallas, TX          |
| Synexus Clinical Research                                                                                                                                                                                                                                                                                                         | Neil Parmanand Sheth, MD                                                                             | Glendale, AZ        |
| Synexus Clinical Research                                                                                                                                                                                                                                                                                                         | Ramy Joseph Toma, MD                                                                                 | Birmingham, AL      |
| Synexus Clinical Research                                                                                                                                                                                                                                                                                                         | Judith White, MD                                                                                     | Orlando, FL         |
| Tekton Research, Inc.                                                                                                                                                                                                                                                                                                             | Paul Pickrell, MD                                                                                    | Austin, TX          |
| Texas Center for Drug Development, Inc.                                                                                                                                                                                                                                                                                           | Veronica G. Fragoso, MD                                                                              | Houston, TX         |
| Trial Management Associates                                                                                                                                                                                                                                                                                                       | Barton G. Williams, MD                                                                               | Wilmington, NC      |
| University of California, Los Angeles<br>NIAID UM1AI068619                                                                                                                                                                                                                                                                        | Jesse L. Clark, MD                                                                                   | Los Angeles, CA     |
| University of California, San Diego<br>NIAID UM1AI068636                                                                                                                                                                                                                                                                          | Stephen A. Spector, Jill Blumenthal, Amaran Moodley                                                  | La Jolla, CA        |
| University of Chicago                                                                                                                                                                                                                                                                                                             | Kathleen M. Mullane, DO, PharmD                                                                      | Chicago, IL         |
| University of Cincinnati<br>NIAID UM1AI068619                                                                                                                                                                                                                                                                                     | Carl Fichtenbaum, MD, Moises A. Huaman, MD, MSc, Margaret Powers-Fletcher, PhD, Michelle Saemann, RN | Cincinnati, OH      |
| University of Colorado Denver, Anschutz Medical Campus<br>NIAID UM1AI068636                                                                                                                                                                                                                                                       | Thomas Campbell, M.D.; Jose Castillo-Mancilla, M.D., Hillary Dunlevy, M.D., Steven Johnson, M.D.     | Aurora, CO          |
| University of Illinois at Chicago - Project WISH<br>NIAID UM1AI068619                                                                                                                                                                                                                                                             | Rick Novak, Scott Borgetti, Tracy Cable, Ben Ladner, Andrew Wendrow,                                 | Chicago, IL         |
| University of Maryland, Baltimore<br>NIAID 1UM1AI148689-01                                                                                                                                                                                                                                                                        | Karen Kotloff, MD; Matthew Laurens, MD, MPH, Milagritos Tapia, MDs                                   | Baltimore, MD       |
| University of Miami<br>NIAID 3UM1AI068614-14S1                                                                                                                                                                                                                                                                                    | Susanne Doblecki-Lewis, MD, MSP, Maria Alcaide, MD, Jose Gonzales-Zamora, MD, Stephen Morris, MD     | Miami, FL           |
| University of North Carolina at Chapel Hill<br>NIAID UM1AI068619                                                                                                                                                                                                                                                                  | Cynthia Gay, MD, Joseph Eron, MD, David Wohl, MD                                                     | Chapel Hill, NC     |
| University of Pennsylvania<br>NIAID 3UM1AI068614-14S1                                                                                                                                                                                                                                                                             | Ian Frank, MD                                                                                        | Philadelphia, PA    |
| University of Pittsburgh, NIAID 1UM1AI148452-01                                                                                                                                                                                                                                                                                   | Judith M. Martin, MD, Alejandro Hoberman, MD, Gysella Pujalt Muniz, MD, Timothy Shope, MD, MPH       |                     |
| University of Texas Medical Branch<br>NIAID 1UM1AI148575-01                                                                                                                                                                                                                                                                       | Richard Rupp; Megan Berman, Laura Porterfield, Amber,Stanford,                                       | Galveston, TX       |
| VA Greater Los Angeles Healthcare System                                                                                                                                                                                                                                                                                          | Michael Lewis, MD                                                                                    | Los Angeles, CA     |
| Vanderbilt University Medical Center<br>NIAID 1UM1AI148452-01                                                                                                                                                                                                                                                                     | C Buddy Creech, Stephanie L. Rolsma, Robert Samuels, Shannon C. Walker                               | Nashville, TN       |
| Vanderbilt University Medical Center<br>NIAID 3UM1AI068614-14S1                                                                                                                                                                                                                                                                   | Spyros Kalams, MD, Greg Wilson, MD                                                                   | Nashville, TN       |
| Velocity Clinical Research                                                                                                                                                                                                                                                                                                        | Gregg H. Lucksinger, MD                                                                              | Medford, OR         |
| VitaLink Research                                                                                                                                                                                                                                                                                                                 | Luis I. De La Cruz, MD                                                                               | Greenville, SC      |
| VitaLink Research                                                                                                                                                                                                                                                                                                                 | Gowdhami Mohan, MD                                                                                   | Anderson, SC        |
| VitaLink Research- Spartanburg                                                                                                                                                                                                                                                                                                    | Gregory J. Feldman, MD                                                                               | Spartanburg, SC     |
| Wake Forest University Health Sciences                                                                                                                                                                                                                                                                                            | John W. Sanders, MD, MPH                                                                             | Winston Salem, NC   |
| WR-Clinical Research Center of Nevada                                                                                                                                                                                                                                                                                             | Michael L. Levin, MD                                                                                 | Las Vegas, NV       |
| WR-ClinSearch                                                                                                                                                                                                                                                                                                                     | Mark Montgomery McKenzie, MD                                                                         | Chattanooga, TN     |
| WR-Global Medical Research                                                                                                                                                                                                                                                                                                        | Valentine Mbepson Ebu, MD                                                                            | Dallas, TX          |
| WR-Medical Center for Clinical Research                                                                                                                                                                                                                                                                                           | Laurie J. Han-Conrad, MD                                                                             | San Diego, CA       |
| *Institutions funded as indicated by National Institute of Allergy and Infectious Diseases (NIAID) and the National center for Advancing Translational Science (NCATS). All other institutions funded by Office of the Assistant Secretary for Preparedness and Response, Biomedical Advanced Research and Development Authority. |                                                                                                      |                     |

## List of COVE Trial Investigators and Study Teams

| Principal Investigator       | Study Team                                                                                                                                                                                                                                                                                                                                                                                                                                                                                                                                                                       | Institution                                            | Location            |
|------------------------------|----------------------------------------------------------------------------------------------------------------------------------------------------------------------------------------------------------------------------------------------------------------------------------------------------------------------------------------------------------------------------------------------------------------------------------------------------------------------------------------------------------------------------------------------------------------------------------|--------------------------------------------------------|---------------------|
| Atoya Adams, MD, MBA         | Eric Miller                                                                                                                                                                                                                                                                                                                                                                                                                                                                                                                                                                      | AB Clinical Trials                                     | Las Vegas, NV       |
| Michael Ryan Adams, MD       | Chase Carnahan, Leslie Iverson, Natalie Smith, Rachel Law, Shannon Wright, Stefanie Vasconez                                                                                                                                                                                                                                                                                                                                                                                                                                                                                     | Synexus Clinical Research                              | Murray, UT          |
| Leland N. Allen III, MD      | Vincent Banglini, David House, Cristina Velez, Christy Greenhalgh, Jessica Mena, Zachary McCoy, Candace Robinson, Caitlin Roll, Kimberly Cornelison                                                                                                                                                                                                                                                                                                                                                                                                                              | St. Vincent's Health System                            | Birmingham, AL      |
| Evan J. Anderson, MD         | Christina Rostad, Andres Camacho-Gonzalez, Satoshi Kamidani, Mehgan Farah Teherani, Teresa Ball, Etza Peters, Peggy Kettle, Lisa Macoy, Cindy Lubbers, Leisa Bower                                                                                                                                                                                                                                                                                                                                                                                                               | Emory University School of Medicine                    | Atlanta, GA         |
| Lindsey R. Baden, MD         | Jane Kleinjan, NP, Jon Gothing, NP, Humberto Licon, MD, Paulette Chandler, MD, Elizabeth Karlson, MD, Christin Price, MD, Lewis Novak, Monica Feeley, Xhoi Mitre, Bruce Bausk, Jessica Cauley, Natalie Izaguirre, Hannah Jin, Julia Klopfer, Phoebe Cunningham, Megan Powell, Jun Bai Park Chang, Noah Abasciano, Alexis Liakos, PA, Karina Oganezova, Kirsten Goodman, NP, Karen Magsipoc, NP, Haley Schram, NP, Maureen Macgowan, PA, Elizabeth Sampson, RN, Lauren Donahue, RN, Opeyemi Talabi, Mike Seaman, PHD, Katherine Yanosick, Alka Patel, PharmD, Allison P. Moriarty | Brigham and Women's Hospital                           | Boston, MA          |
| Bindu Balani, MD             | Cristina Cicogna, Steven Spenber                                                                                                                                                                                                                                                                                                                                                                                                                                                                                                                                                 | Hackensack University Medical Center                   | Hackensack, NJ      |
| Mira Baron, MD               | Pamela Kane, Maria Bermudez, Mara Kryvicky, Shannen Seversen                                                                                                                                                                                                                                                                                                                                                                                                                                                                                                                     | Palm Beach Research Center                             | West Palm Beach, FL |
| Judith Borger, DO            | Scott Syndergaard, Ryan Starr, Lynn Eckert, Ifeanyi Momodu, Cheryl Norris, Nafisa Saleem, Nicole Austin                                                                                                                                                                                                                                                                                                                                                                                                                                                                          | Carolina Institute for Clinical Research               | Fayetteville, NC    |
| Paul Simon Bradley, MD       | Amanda Lilienthal, Kay Lynn Olmsted, Anne Crouch, Brooke Halpern                                                                                                                                                                                                                                                                                                                                                                                                                                                                                                                 | Meridian Clinical Research                             | Savannah, GA        |
| Adam Benson Brosz, MD        | Susan Mae Newman, Lindsey Christel Mattenbrink, Kayla Flege, Douglas Herbek, Luke Friesen                                                                                                                                                                                                                                                                                                                                                                                                                                                                                        | Meridian Clinical Research                             | Grand Island, NE    |
| Abram Burgher, MD            | Marybeth Barcome, Matthew Doust                                                                                                                                                                                                                                                                                                                                                                                                                                                                                                                                                  | Hope Research Institute                                | Phoenix, AZ         |
| Thomas B. Campbell, MD       | Hillary Dunlevy, Steven Johnson, Martin Krsak, Andrew Monte, Jose Castillo-Mancilla, Kristine Erlandson, Michelle Barron, Cathi Basler, Andrew Lauria                                                                                                                                                                                                                                                                                                                                                                                                                            | University of Colorado Denver, Anschutz Medical Campus | Aurora, CO          |
| Shane Glade Christensen, MD  | Holly Marie Anderson, Emily Kathleen Bloomquist, Ross Anthony Brunetti, Thomas Conner, Gina Cox, Diana Grazulis, Wesley Lewis, James Longe, Christopher Match, Bryan Nelson, Emily Raming, Sarah Scott, John Edward Witbeck, Stephen Wood                                                                                                                                                                                                                                                                                                                                        | J. Lewis Research                                      | Salt Lake City, UT  |
| Laurence Chu, MD             | R. Michelle Chouteau, Tandra Dora, Pamela Conley, Ruth Fitch, Katherine Davis, Dean Skiles, Brooke Harris, Kelly Weber, Francesca Vigil, Isaiah Knight, Maria Barrientes, Lauren Christal, Clara Loza, Christian Casas, Selena Bermudez                                                                                                                                                                                                                                                                                                                                          | Benchmark Research                                     | Austin, TX          |
| Jesse L. Clark, MD           | William Hernandez                                                                                                                                                                                                                                                                                                                                                                                                                                                                                                                                                                | University of California, Los Angeles                  | Los Angeles, CA     |
| Michael J. Cotugno, MD       | George Bauer, Edwin Adamson, Julie Bilich, Brenda Lawson, Kim Harper, Lois Eaglin, Kyra Lawson, Shannon Williams                                                                                                                                                                                                                                                                                                                                                                                                                                                                 | Benchmark Research                                     | Metairie, LA        |
| Clarence Buddy Creech II, MD | Isaac Thomsen, Shannon Walker, Leigh Howard                                                                                                                                                                                                                                                                                                                                                                                                                                                                                                                                      | Vanderbilt University Medical Center                   | Nashville, TN       |
| Joseph D. Davis, MD          | Brendan Levy                                                                                                                                                                                                                                                                                                                                                                                                                                                                                                                                                                     | Hope Research Institute                                | Chandler, AZ        |
| Luis I. De La Cruz, MD       | David Godwin, Elizabeth Everette, Steven Clemons, Supinder Channa                                                                                                                                                                                                                                                                                                                                                                                                                                                                                                                | VitaLink Research                                      | Greenville, SC      |
| Douglas Scott Denham, DO     | Ayoade Aworo, Thomas Weiss, Parbe Hedges, Stephen Brick                                                                                                                                                                                                                                                                                                                                                                                                                                                                                                                          | Clinical Trials of Texas                               | San Antonio, TX     |
| David Joseph Diemert, MD     | Marc Siegel, Gary Simon, David Parenti, Roberts Afsoon, Hana Akselrod, Aimee Desrosiers, Elissa Malkin                                                                                                                                                                                                                                                                                                                                                                                                                                                                           | George Washington University                           | Washington, DC      |
| Susanne Doblecki-Lewis, MD   | Maria Alcaide, Stephen Morris, Jovanna Bertrean-Lopez, Elisa Corso-Sanchez, Alex Lazo-Vasquez, Leopoldo Cordova-Garcia, Loreta Padron                                                                                                                                                                                                                                                                                                                                                                                                                                            | University of Miami                                    | Miami, FL           |
| Matthew W. Doust, MD         | Sandra Erickson, Steven Siwek, Denise Sample                                                                                                                                                                                                                                                                                                                                                                                                                                                                                                                                     | Hope Research Institute                                | Phoenix, AZ         |
| Valentine Mbebson Ebuh, MD   | Elwaleed Elnagar                                                                                                                                                                                                                                                                                                                                                                                                                                                                                                                                                                 | WR-Global Medical Research                             | Dallas, TX          |
| Frank Steven Eder, MD        | Heather Shaw, Ryan Little, Victoria Engler, John Tarbox                                                                                                                                                                                                                                                                                                                                                                                                                                                                                                                          | Meridian Clinical Research                             | Binghamton, NY      |

| Principal Investigator       | Study Team                                                                                                                                                                                                                                                                                                                                                                                                                                                                                              | Institution                                            | Location             |
|------------------------------|---------------------------------------------------------------------------------------------------------------------------------------------------------------------------------------------------------------------------------------------------------------------------------------------------------------------------------------------------------------------------------------------------------------------------------------------------------------------------------------------------------|--------------------------------------------------------|----------------------|
| Hana M. El Sahly, MD         | Robert L. Atmar, MD, Wendy A Keitel, MD, Barbara Annette Nagel, RN, Sandra Francisco, Coni Cheesman PA-C, Thea Cordero, NP, Carrie Kiebler RN, Janet Brown RPh, Connie Rangel RN, Jennifer Christensen RPh, Chaneí Henry, Caroline Doughty Skierski, RN, Chianti Wade Bowers, RN, Kayla Burrell, Kathy Bosworth, Jesus Banay, Trent Davis, Shetel Anassi, Jennifer Whitaker, Catherine Healy, Christine Akamine, Lisreina Toro, Tykel Eddy, Kayla Burrell, Jess Banay, Pedro Piedra, Olga Rybina-Willis | Baylor College of Medicine                             | Houston, TX          |
| David Jon Ensz, MD           | Tavane Harrison, Allie Oplinger, Brandon Essink                                                                                                                                                                                                                                                                                                                                                                                                                                                         | Meridian Clinical Research                             | Dakota Dunes, SD     |
| Brandon James Essink, MD     | Jay Meyer, Frederick Raiser III, Kimberly Mueller, Roni Gray, Laura Falcone                                                                                                                                                                                                                                                                                                                                                                                                                             | Meridian Clinical Research                             | Omaha, NE            |
| Gregory J. Feldman, MD       | Joseph Boscia, Farhan Siddiqui, Catherine Voelker, May-Yin Suen                                                                                                                                                                                                                                                                                                                                                                                                                                         | VitaLink Research-Spartanburg                          | Spartanburg, SC      |
| Carl J. Fichtenbaum, MD      | Lisa Altenau, Kathleen Ballman, Makayla Bishop, Dana Burns, Carrie Christofield, Sherry Donaworth, Pam Fletcher, Jeanine Goddin, Shaina Horner, Judy Houston, Moises Huaman, Tamara Maus, Margaret Powers, Lisa Proffit, Kelly Windholtz                                                                                                                                                                                                                                                                | University of Cincinnati                               | Cincinnati, OH       |
| Carlos A. Fierro, MD         | Casey Johnson, Celia Gonzales, Natalia Leinstner                                                                                                                                                                                                                                                                                                                                                                                                                                                        | Johnson County Clin-Trials                             | Lenexa, KS           |
| Veronica G. Fragoso, MD      | Vicky Miller, Teresa M. Becker, Cecilia Mckeown, Tracy Kowalski, Lisa Holloway, Robert Weaver, Blanca Gomez                                                                                                                                                                                                                                                                                                                                                                                             | Texas Center For Drug Development, Inc.                | Houston, TX          |
| Ian Frank, MD                | William Short, Kathleen Degnan, Helen Koening, Dovie Watson, Florence Momplaisir, Sarah Wood, Katherine Bar, Jillian Baron, David Mtzger, Jie Ho, Gillain Constantino                                                                                                                                                                                                                                                                                                                                   | University of Pennsylvania                             | Philadelphia, PA     |
| Sharon E. Frey, MD           | Getahun Abate, Shirley Dettlebach, Sabrina DiPiazza, Heather Douds, Carol Duane, Linda Eggemeyer-Sharpe, Sarah George, Geoffrey Gorse, Irene Graham, Daniel Hoft, Rong Hou, Kate Liefer, Tracy Montauk, Karla Mosby, Claudia Paredes, Joan Siegner, Susan Stewart, Janice Tennant, Jin Wang, Qian Wang                                                                                                                                                                                                  | Saint Louis University                                 | St. Louis, MO        |
| Cynthia Gay, MD              | Joseph Eron, Susan Perderson, Lina Rosegren-Hovee, David Wohl, Faith Claman, Michael Herce, Suzanne Blevins, Christopher Hurt, Brian Gurney, Tevnan Keller, Michelle Floris-Moore                                                                                                                                                                                                                                                                                                                       | University of North Carolina at Chapel Hill            | Chapel Hill, NC      |
| Richard M. Glover, II, MD    | Robyn Hartvickson, Troy Holdeman, Stacy Slechta, Amber Grant, Jeri King, Justin Philips, Eileen Wilbert, Sheri Duncan, Janelle Brown, Katherine Saengerhausen, Jordan Danby, Aaron Nguyen                                                                                                                                                                                                                                                                                                               | Alliance for Multispecialty Research                   | Newton, KS           |
| Gregory Mark Gottschlich, MD | Michael Pordy, Audrius Ruksenas, Lacy Baird, Melissa Gottschlich, Gregory Mark Gottschlich II, Mary Smith                                                                                                                                                                                                                                                                                                                                                                                               | New Horizons Clinical Research                         | Cincinnati, OH       |
| Sinikka L. Green, MD         | Jayasree Krishnankutty, Gregg Lucksinger                                                                                                                                                                                                                                                                                                                                                                                                                                                                | Advanced Clinical Research                             | Cedar Park, TX       |
| Carl P. Griffin, MD          | William Schnitz, Raymond Cornelison, Shanda Gower, Angela Genovese                                                                                                                                                                                                                                                                                                                                                                                                                                      | Lynn Health Science Institute                          | Oklahoma City, OK    |
| Milton Haber, MD             | Ronald Meza, Esteban Zurita, Marco Vela                                                                                                                                                                                                                                                                                                                                                                                                                                                                 | Laguna Clinical Research Associates                    | Laredo, TX           |
| Greg Hachigian, MD           | Peter Wroblicky, Masaru Oshita, Julie Raygoza, Maria Alyssa Lee, Shaila Faulkner, Yaman Darmarathne, Ashley Jungsten, Zuriel Joven                                                                                                                                                                                                                                                                                                                                                                      | Benchmark Research                                     | Sacramento, CA       |
| Laurie J. Han-Conrad, MD     | Dana Maxwell Shipp, Denis Tarakjian, Todd Tyler Simmons                                                                                                                                                                                                                                                                                                                                                                                                                                                 | WR-Medical Center for Clinical Research                | San Diego, CA        |
| Wayne Lee Harper, MD         | Lisa Mauri Cohen, Dougkas Allen Wadeson, Lynn Gordon Eckert                                                                                                                                                                                                                                                                                                                                                                                                                                             | M3 Wake Research                                       | Raleigh, NC          |
| Ripley R. Hollister, MD      | Melody Ronk, Jeremy Brown                                                                                                                                                                                                                                                                                                                                                                                                                                                                               | Lynn Institute of the Rockies                          | Colorado Springs, CO |
| Lisa A. Jackson, MD, MPH     | Maya Dunstan, Joyce Zorr-Benoit, Roger Calvert, Bruce Douglas, Colin Fields, Paula Lins, Melissa Scheer-Boothe, Karen Sherwin                                                                                                                                                                                                                                                                                                                                                                           | Kaiser Permanente Washington Health Research Institute | Seattle, WA          |
| Spyros Andrews Kalams, MD    | Gregory Wilson                                                                                                                                                                                                                                                                                                                                                                                                                                                                                          | Vanderbilt University Medical Center                   | Nashville, TN        |
| Colleen Kelley, MD, MPH      | Jeffrey Lennox, Valeria Cantos, Paulina Rebolledo, Carlos del Rio, Sheetal Kandiah, Caitlin Moran, Anandi Sheth                                                                                                                                                                                                                                                                                                                                                                                         | Emory University - Hope Clinic                         | Decatur, GA          |
| Christina Kennelly, MD       | David Framm, Gary Rolband, Hala Webster, Gibson Gwyn, Melissa James, Robert Brownlee, Chiedza Hooker, James Alexander                                                                                                                                                                                                                                                                                                                                                                                   | Javara                                                 | Charlotte, NC        |
| Shishir Kumar Khetan, MD     | Rahul Patel, Asefa Mekonnen, Oyebisi Olanrewaju, Ira Lawrence Berger, Alan Pollack, Allison O'Brien                                                                                                                                                                                                                                                                                                                                                                                                     | Meridian Clinical Researc                              | Rockville, MD        |
| Murray A. Kimmel, DO         | Alexa Diec, Ann Riley, Bette Denmat, Bram Swarr, Christina Raidl, Dania Billman, Denise Dixon, Donald Dawson, Elaine Crudo, James Crowley, Katrina Carlson, Kaylie Worzick, Laura Worth, Lisbeth Gordon, Marion Oliver, Robert Holt, Simmy Pinto, Taylor Atkinson, Traci Mitchell                                                                                                                                                                                                                       | Optimal Research                                       | Melbourne, FL        |

| Principal Investigator          | Study Team                                                                                                                                                                                                                                                   | Institution                                          | Location           |
|---------------------------------|--------------------------------------------------------------------------------------------------------------------------------------------------------------------------------------------------------------------------------------------------------------|------------------------------------------------------|--------------------|
| Judith L. Kirstein, MD          | Alan Valenzuela, Theodore Wyman, Ana Caroline Remigio, Marcia Bernard                                                                                                                                                                                        | Rancho Paseo Medical Group                           | Banning, CA        |
| Michael J. Koren, MD            | Carolyn Tran, Jeffrey Jacqmein, Darlene Bartilucci, Ipa Patel, Janet Garvey, Kenneth Aung-Din, Mitchell Rothstein, Nafisa Ishaku, Margaret Gannaway                                                                                                          | Jacksonville Center For Clinical Research            | Jacksonville, FL   |
| Karen L. Kotloff, MD            | Andrea Berry, Barbara Albert, DeAnna Friedman-Klabanoff, Elizabeth Hammershaimb, James Campbell, Justin Ortiz, Kathleen Neuzil, Kirsten Lyke, Mark Travassos, Matthew Laurens, Meagan Deming, Monica McArthur, Rekha Rapaka, Wilbur Chen                     | University of Maryland, Baltimore                    | Baltimore, MD      |
| Mark E. Kutner, MD              | Janet Mendez, Marianela Carvajal, Jorge Caso, Maria Hernandez Moran                                                                                                                                                                                          | Suncoast Research Group                              | Miami, FL          |
| Mimi Van Der Leden, MD, PhD     | Peta-Gay Jackson-Booth, Jennifer Yoon, Gloria Kim, Temitope Umah, Atanas Filev                                                                                                                                                                               | Optimal Research                                     | Rockville, MD      |
| Michael L. Levin, MD            | Dana Trippi, Erik Evensen, Marcy Kulic                                                                                                                                                                                                                       | WR-Clinical Research Center of Nevada                | Las Vegas, NV      |
| Michael Lewis, MD               | Elham Ghadishah, Joseph Pisegna, Joseph Yusin                                                                                                                                                                                                                | VA Greater Los Angeles Healthcare System             | Los Angeles, CA    |
| Gregg H. Lucksinger, MD         | Kevin Parks, Ryan Israelsen, Jaleh Ostovar, Kary Kelly, Tiffany Smith                                                                                                                                                                                        | Velocity Clinical Research                           | Medford, OR        |
| Mary Beth Manning, MD           | Toby Briskin, Kathryn Bucur, Joan Rothenberg, Devan Patel, Jennifer Gaston, Sarah Dzigiel                                                                                                                                                                    | Rapid Medical Research                               | Cleveland, OH      |
| Kristen Marks, MD               | Timothy Wilkin, Roy Gulick, Valery Hughes, Tina Wang, Noah Goss, Ole Vilemeyer, Shaun Barcavage                                                                                                                                                              | Cornell Clinical Trials Unit - Weill Cornell Chelsea | New York, NY       |
| Judith Martin, MD               | Alejandro Hoberman, Nader Shaikh, Timothy Shope, Sonika Bhatnagar, Gysella Muniz, Kumaravel Rajakumar, Anne-Marie Rick, Lalia Roman, Marcia Pope, Peri Unligil, Diana Kearney                                                                                | UPMC University Center                               | Pittsburgh, PA     |
| John W. McGettigan, Jr., MD     | Walter Patton, Cynthia Benoy, Karin Choquette, Mikell Karsten, Sheldon Gingrich, Patricia Jalomo, Riemke Brakema                                                                                                                                             | Quality of Life Medical & Research Centers           | Tucson, AZ         |
| Mark Montgomery McKenzie, MD    | Teresa Deese                                                                                                                                                                                                                                                 | WR-ClinSearch                                        | Chattanooga, TN    |
| Vicki E. Miller, MD             | Monica Murray, Amy Starr, Muhammad Irfan, Fredic Santiago, Insiya Valika, Blanca Gomez                                                                                                                                                                       | DM Clinical Research                                 | Tomball, TX        |
| Gowdhami Mohan, MD              | Charles Thompson, Steven Clemons                                                                                                                                                                                                                             | VitaLink Research                                    | Anderson, SC       |
| Kathleen M. Mullane, DO, PharmD | David Pitrak, Stephen Schrantz, Cheryl Nuss                                                                                                                                                                                                                  | University of Chicago                                | Chicago, IL        |
| Joseph Lee Newberg, MD          | Laura Pearlman                                                                                                                                                                                                                                               | Synexus Clinical Research                            | Chicago, IL        |
| Richard M. Novak, MD            | Scott Borgetti, Brito Maximo, Mahesh Patel                                                                                                                                                                                                                   | University of Illinois at Chicago - Project WISH     | Chicago, IL        |
| Paul Joseph Nugent, DO          | Leonard Singer, Georgettea Geuss                                                                                                                                                                                                                             | Synexus Clinical Research                            | Cincinnati, OH     |
| Jeffrey Scott Overcash, MD      | Hanh Chu, Karla Zepeda, Kia Lee, Michael Waters                                                                                                                                                                                                              | eStudySite                                           | La Mesa, CA        |
| James Todd Peterson, MD         | Natalie Bee, Alexander Clark, Shana Eborn, Susan Edwards, Dan Henry, Heather Jackson, Gerald Kely, Issac Pena-Renteria, Jacqueline Rohrer, Jack Taylor                                                                                                       | J. Lewis Research                                    | Salt Lake City, UT |
| Paul Pickrell, MD               | David Pampe, Carol Ann Linebarger, Hussain Malbari                                                                                                                                                                                                           | Tekton Research, Inc.                                | Austin, TX         |
| Terry L. Poling, MD             | Terry Klein, Tracy Klein, Thomas Klein, Gregory Greer, Taylor Simmons, Christa Shue, Lynn Le, Meenakshi Natesan, Gina Young, Lisa Hemmelgarn, Jill Hiebert, Denise Hole, Melissa Burton, Olivia Eagleson, Laura Holz, Terri Ford, Cindy Thome, Brenna Sprout | Alliance for Multispecialty Research                 | Wichita, KS        |
| Bruce G. Rankin, DO             | John Hill, Daniel Campbell, Steven Shinn, Jennifer Dittman, Crystal Paccione, Dhaneshwar Oomrow, Antonio Rivera, Amber Vasquez, Thais Truffa                                                                                                                 | Accel Research Sites                                 | DeLand, FL         |
| Michele Diane Reynolds, MD      | Jennifer Bashour, Tabitha Stutevoss                                                                                                                                                                                                                          | Synexus Clinical Research                            | Dallas, TX         |
| Rambod Rouhbakhsh, MD, MBA      | Omelia Danford                                                                                                                                                                                                                                               | MediSync Clinical Research Hattiesburg Clinic        | Petal, MS          |
| Nadine Roupheal, MD             | Alexis Ahonen, Cassie Ackerley, Colleen Kelley, Daniel Garciaa, Easton Beshears, Jessica Traenkner, Kristen Unterberger, Lauren Nolan, Mary Atha, Matthew Collins, Nicholas Scanlon, Paulina Rebolledo, Srilatha Edupuganti, Varun Phadke                    | Emory University - Hope Clinic                       | Decatur, GA        |
| Richard Rupp, MD                | Steven Spenber, Richard Rupp, Laura Porterfield, Megan Berman, Cori Burkett, Amber Stanford, Elizabeth Ginn                                                                                                                                                  | University of Texas Medical Branch                   | Galveston, TX      |

| Principal Investigator       | Study Team                                                                                                                                                                                      | Institution                                 | Location           |
|------------------------------|-------------------------------------------------------------------------------------------------------------------------------------------------------------------------------------------------|---------------------------------------------|--------------------|
| Jamshid Saleh, MD            | Alisha Garcia, Candice Cabading, Carmen Flores, Emily Crews, Marisol Corrales, Mathew Miles, Mohamed Yassin, Rafael Lupercio, Stephanie Clayton, Vicky Martin                                   | Paradigm Clinical Research Center           | Redding, CA        |
| John W. Sanders, MD, MPH     | Ann Schweppe, Anna Bowman, James Peacock, John Williamson, Katharine Pearsall, Stacy Harpe-Hall, Stephanie Boothe, Wendy Moore                                                                  | Wake Forest University Health Sciences      | Winston Salem, NC  |
| Howard I. Schwartz, MD       | Nelia Sanchez-Crespo, Barbara Corral, Jennifer Schwartz, Surusday Mederos, Peter Ventre, Maria Companioni, José Muniz                                                                           | Research Centers of America                 | Hollywood, FL      |
| Nathan Segall, MD            | Jon Finley, Pamela Talbot, Mildred Stull, Donna Toepfer, Kwannda Whatley, Michelle Sowell, Jeffrey Jones, Jennifer LeBrun, Nancy Levine, Cynthia Steele                                         | Clinical Research Atlanta                   | Stockbridge, GA    |
| William Seger, MD            | Mohammed Antwi, Jean Seignon, Anthony Kim, Kimberly Pullen                                                                                                                                      | Benchmark Research                          | Fort Worth, TX     |
| Neil Parmanand Sheth, MD     | Kenneth Steil                                                                                                                                                                                   | Synexus Clinical Research                   | Glendale, AZ       |
| William B. Smith, MD         | Richard Gibson, Katherine Buckner                                                                                                                                                               | Alliance for Multispecialty Research        | Knoxville, TN      |
| Joel Solis, MD               | Mratha Carmen Medina, Westly Keating, Edgar Garcia, Samuel Ramirez, Daniel Contreras, Anne McNulty-Paine, Cynthia Bueno, Pedro Penalo                                                           | Centex Studies, Inc.                        | McAllen, TX        |
| Stephen A. Spector, MD       | Jill Blumenthal, Amaran Moodley, Lisa Stangl, Karen Deutsch, Carlos Rojas                                                                                                                       | University of California, San Diego         | La Jolla, CA       |
| Cynthia Becher Strout, MD    | Rica Santiago, Patty Howenstine, Yvonne Davis, Alison Bondell                                                                                                                                   | Coastal Carolina Research Center            | Mount Pleasant, SC |
| Shobha Swaminathan, MD       | Michelle DallaPiazza                                                                                                                                                                            | Rutgers New Jersey Medical School           | Newark, NJ         |
| Ramy Joseph Toma, MD         | William Kirby, Rian Montgomery                                                                                                                                                                  | Synexus Clinical Research                   | Birmingham, AL     |
| Timothy P. Vachris, MD       | Dana Hutchens                                                                                                                                                                                   | Optimal Research                            | Austin, TX         |
| Keith William Vrbicky, MD    | Charles Harper, Wendell Lewis III, Cathy Laflan, Kari Uhler, Chelsie Nutsch                                                                                                                     | Meridian Clinical Research                  | Norfolk, NE        |
| Larkin T. Wadsworth III, MD  | Horacio Marafioti, Lyly Dang, Jennifer Berry                                                                                                                                                    | Sundance Clinical Research                  | St. Louis, MO      |
| Jordan L. Whatley, MD        | Nicole Harrel, Lindsey Hall, Amie Shannon, Mary Dobson, Kristen Losavio, Crystal Rowell                                                                                                         | Meridian Clinical Research                  | Baton Rouge, LA    |
| Judith White, MD             | Christine Murphy, Robert Meyer, Prity Patel, Nicholas Weber, Sejal Patel                                                                                                                        | Synexus Clinical Research                   | Orlando, FL        |
| Priyantha N. Wijewardane, MD | A. Michele Maxwell, Amy Cooper, Eric Bravo, Jeffrey Thessing, Richard Pellegrino, Tina Cox                                                                                                      | Baptist Health Center for Clinical Research | Little Rock, AR    |
| Barton G. Williams, MD       | William Jones                                                                                                                                                                                   | Trial Management Associates                 | Wilmington, NC     |
| Marcus J. Zervos, MD         | John McKinnon, Dee Dee Wang, Mayur Ramesh, Gina Maki, Katherine Reyes, Paul Kilgore, Erica Herc, Brar Indira, Allison Weinmann, Jeffrey Van Laere, Howard Klausner, Joseph Miller, Linda Kaljee | Henry Ford Health System                    | Detroit, MI        |



## Supplemental Statistical Methods

### *Statistical aspects of the vaccine efficacy analysis*

Vaccine efficacy (VE) is defined as the percent reduction in the hazard, i.e. one minus the hazard ratio (HR, mRNA 1273 vs. placebo).

For the primary efficacy and secondary efficacy endpoints, a stratified Cox proportional hazard (PH) model with Efron's method of tie handling and with vaccine groups (mRNA-1273 or Placebo) as covariate is used to assess the vaccine efficacy (i.e.  $1 - HR$ ) between mRNA-1273 vs. placebo. The model is adjusted for the same stratification factors used for randomization. The estimator of VE and its 95% CI is provided from the stratified Cox proportional model.

For the primary efficacy endpoint, Covid-19 cases based on adjudication committee assessments starting 14 days after the second injection in the Per-Protocol (PP) set, the one-sided p-value for testing the null hypothesis ( $VE \leq 30\%$ ) derived from the stratified Cox model is provided. At IA1, based on a total of 95 cases, the one-sided p-value was  $<0.0001$ , and was compared to a one-sided alpha of 0.0047 based on 62.9% information of the target total number (95/151) using the Lan-DeMets O'Brien-Fleming approximation. Therefore, the pre-specified statistical criterion for study success was demonstrated at IA1.

For the primary and secondary efficacy endpoints, incidence rate, defined as the number of participants with an event divided by the number of participants at risk and adjusted by person-years (total time at risk) is calculated. The 95% CI is calculated using the exact method (Poisson distribution) and adjusted by person-years. \*VE is defined as  $1 -$  ratio of incidence rate (mRNA-1273 vs. placebo). The 95% CI of the ratio is calculated using the exact method conditional upon the total number of cases, adjusting for person-years.

### *Stratified Cox regression model to derive estimates of vaccine efficacy as 1-HR.*

The assumption of the cox proportional hazard model is that the hazard rate ratio is a constant, i.e. the vaccine efficacy is independent of the rate at which cases occur in the Placebo group in any short time interval. At the first interim analysis with a median follow-up time of 49 days after the second dose, based on 95 cases, the vaccine efficacy estimate from the stratified Cox model was 94.5%. At the primary analysis with a median follow-up time of approximately 9 weeks after the second dose, based on 196 cases, the vaccine efficacy estimate from the stratified Cox model was 94.1%. These results indicate the vaccine efficacy is independent of the rate on Placebo. Analyses based on the exact method conditional on the total number of cases have also been performed and the results are consistent with that from the stratified Cox model.

In addition, the pattern of cumulative incidence curves (based on  $1 -$  Kaplan-Meier estimate) for two treatment groups on Covid-19 counted starting 14 days after second dose in the PP set (primary analysis, Figure 3A) and Covid-19 counted starting from randomization in modified intent-to-treat (mITT) set (sensitivity analysis, Figure 3B) show that the proportional hazard assumption holds: two curves of the treatment groups start together with 0 events, separate around day 42 (14 days after second dose) in Figure 3A and Day 14 in Figure 3B, and then diverge over time without crossing.

The plot of log-log transformation of estimated survival probability was examined, based on November 25, 2020 data, of primary endpoint in the PP set. The curves for the two groups were approximately parallel, which supports that the proportional hazard assumption holds

### ***Rationale for Assessment of Vaccine Efficacy in the Per-Protocol Population.***

It is not uncommon to use the PP Set as the primary analysis population for efficacy for vaccine studies, as it usually includes participants who have received the intended vaccine regimen. In the PP set, participants are included in the vaccine group to which they were randomized. In our study, the PP Set excluded randomized participants who had positive or missing baseline SARS-CoV-2 status at baseline, who received the incorrect study vaccine, discontinued study before receiving dose 2, or received dose 2 outside of [day 22, 42] window, and other major protocol deviations that impacted critical data. The reasons for exclusions are summarized in Figures 1 and S1. Additionally, sensitivity analyses in the mITT set were performed to assess the consistency of vaccine efficacy.

### ***Additional details supporting Figures 3A and 3B.***

In Figures 3 and 4, the time axis started from randomization in days. Figure 3A presents the primary analysis of Covid-19 based on adjudication committee assessments starting 14 days after the second vaccination in the Per-Protocol Set. In this analysis, participants with an onset date of Covid-19 starting 14 days after second dose are events with date of onset; participants with an onset date for Covid-19 <14 days after the second dose (early case) were censored at the date of Covid-19. Participants who did not have Covid-19 were censored at the data cutoff date for efficacy. Participants who discontinued the study early or died due to cause unrelated to Covid-19 without documented Covid-19 are censored at the date of early discontinuation or death. Therefore, the cumulative incidence curves started to separate around 42 days after randomization as the date of Covid-19 in this analysis starts 14 days after second vaccination (with a target day of Day 29). The censoring started around day 29 as the earliest discontinuation in the Per-Protocol Set. Participants who discontinued before dose 2, received dose 2 outside of day [23, 42] window have been excluded from the Per-Protocol Set.

Figure 3B presents a sensitivity analysis of Covid-19 from randomization in the mITT Set. In this analysis, participants who had Covid-19 were events with date of onset. The other censoring rules are the same as above. The mITT Set only excludes randomized participants who did not receive any dose, or had positive or missing baseline SARS-CoV-2 status. Therefore, censoring starts early after randomization (early discontinuations), and the two curves started to separate early.

*Baseline demographics and characteristics using the per-protocol set are provided as supportive data for Table 1 based on the randomized participants.*

| <b>Baseline Demographics and Characteristics Based in the Per-Protocol Set</b>                                                                                                                                                                                                                                                                                                                                                                                                                                                                                                                                                                                                                                                                                                                                                                                                                                                                                                                                                         |                          |                            |                        |
|----------------------------------------------------------------------------------------------------------------------------------------------------------------------------------------------------------------------------------------------------------------------------------------------------------------------------------------------------------------------------------------------------------------------------------------------------------------------------------------------------------------------------------------------------------------------------------------------------------------------------------------------------------------------------------------------------------------------------------------------------------------------------------------------------------------------------------------------------------------------------------------------------------------------------------------------------------------------------------------------------------------------------------------|--------------------------|----------------------------|------------------------|
| <b>Characteristics n (%)</b>                                                                                                                                                                                                                                                                                                                                                                                                                                                                                                                                                                                                                                                                                                                                                                                                                                                                                                                                                                                                           | <b>Placebo (N=14073)</b> | <b>mRNA-1273 (N=14134)</b> | <b>Total (N=28207)</b> |
| Sex                                                                                                                                                                                                                                                                                                                                                                                                                                                                                                                                                                                                                                                                                                                                                                                                                                                                                                                                                                                                                                    |                          |                            |                        |
| Male                                                                                                                                                                                                                                                                                                                                                                                                                                                                                                                                                                                                                                                                                                                                                                                                                                                                                                                                                                                                                                   | 7462 (53.0)              | 7366 (52.1)                | 14828 (52.6)           |
| Female                                                                                                                                                                                                                                                                                                                                                                                                                                                                                                                                                                                                                                                                                                                                                                                                                                                                                                                                                                                                                                 | 6611 (47.0)              | 6768 (47.9)                | 13379 (47.4)           |
| Age at Screening (yr)                                                                                                                                                                                                                                                                                                                                                                                                                                                                                                                                                                                                                                                                                                                                                                                                                                                                                                                                                                                                                  |                          |                            |                        |
| Mean (range)                                                                                                                                                                                                                                                                                                                                                                                                                                                                                                                                                                                                                                                                                                                                                                                                                                                                                                                                                                                                                           | 51.6 (18- 95)            | 51.6 (18- 95)              | 51.6 (18- 95)          |
| Age (yr) and health risk for severe Covid-19*                                                                                                                                                                                                                                                                                                                                                                                                                                                                                                                                                                                                                                                                                                                                                                                                                                                                                                                                                                                          |                          |                            |                        |
| ≥18 and <65 and Not at Risk                                                                                                                                                                                                                                                                                                                                                                                                                                                                                                                                                                                                                                                                                                                                                                                                                                                                                                                                                                                                            | 8200 (58.3)              | 8189 (57.9)                | 16389 (58.1)           |
| ≥18 and <65 and at Risk                                                                                                                                                                                                                                                                                                                                                                                                                                                                                                                                                                                                                                                                                                                                                                                                                                                                                                                                                                                                                | 2324 (16.5)              | 2367 (16.7)                | 4691 (16.6)            |
| ≥65                                                                                                                                                                                                                                                                                                                                                                                                                                                                                                                                                                                                                                                                                                                                                                                                                                                                                                                                                                                                                                    | 3549 (25.2)              | 3578 (25.3)                | 7127 (25.3)            |
| Ethnicity                                                                                                                                                                                                                                                                                                                                                                                                                                                                                                                                                                                                                                                                                                                                                                                                                                                                                                                                                                                                                              |                          |                            |                        |
| Hispanic or Latino                                                                                                                                                                                                                                                                                                                                                                                                                                                                                                                                                                                                                                                                                                                                                                                                                                                                                                                                                                                                                     | 2780 (19.8)              | 2789 (19.7)                | 5569 (19.7)            |
| Not Hispanic or Latino                                                                                                                                                                                                                                                                                                                                                                                                                                                                                                                                                                                                                                                                                                                                                                                                                                                                                                                                                                                                                 | 11165 (79.3)             | 11212 (79.3)               | 22377 (79.3)           |
| Not reported and unknown                                                                                                                                                                                                                                                                                                                                                                                                                                                                                                                                                                                                                                                                                                                                                                                                                                                                                                                                                                                                               | 128 (0.9)                | 133 (1.0)                  | 261 (0.9)              |
| Race‡                                                                                                                                                                                                                                                                                                                                                                                                                                                                                                                                                                                                                                                                                                                                                                                                                                                                                                                                                                                                                                  |                          |                            |                        |
| White                                                                                                                                                                                                                                                                                                                                                                                                                                                                                                                                                                                                                                                                                                                                                                                                                                                                                                                                                                                                                                  | 11174 (79.4)             | 11253 (79.6)               | 22427 (79.5)           |
| Black or African American                                                                                                                                                                                                                                                                                                                                                                                                                                                                                                                                                                                                                                                                                                                                                                                                                                                                                                                                                                                                              | 1349 (9.6)               | 1385 (9.8)                 | 2734 (9.7)             |
| Asian                                                                                                                                                                                                                                                                                                                                                                                                                                                                                                                                                                                                                                                                                                                                                                                                                                                                                                                                                                                                                                  | 689 (4.9)                | 620 (4.4)                  | 1309 (4.6)             |
| American Indian or Alaska Native                                                                                                                                                                                                                                                                                                                                                                                                                                                                                                                                                                                                                                                                                                                                                                                                                                                                                                                                                                                                       | 111 (0.8)                | 108 (0.8)                  | 219 (0.8)              |
| Native Hawaiian or Other Pacific Islander                                                                                                                                                                                                                                                                                                                                                                                                                                                                                                                                                                                                                                                                                                                                                                                                                                                                                                                                                                                              | 31 (0.2)                 | 35 (0.2)                   | 66 (0.2)               |
| Multiracial                                                                                                                                                                                                                                                                                                                                                                                                                                                                                                                                                                                                                                                                                                                                                                                                                                                                                                                                                                                                                            | 307 (2.2)                | 295 (2.1)                  | 602 (2.1)              |
| Other                                                                                                                                                                                                                                                                                                                                                                                                                                                                                                                                                                                                                                                                                                                                                                                                                                                                                                                                                                                                                                  | 295 (2.1)                | 299 (2.1)                  | 594 (2.1)              |
| Not reported and unknown                                                                                                                                                                                                                                                                                                                                                                                                                                                                                                                                                                                                                                                                                                                                                                                                                                                                                                                                                                                                               | 117 (0.9)                | 139 (1.0)                  | 256 (0.9)              |
| Baseline SARS-CoV-2 Status†                                                                                                                                                                                                                                                                                                                                                                                                                                                                                                                                                                                                                                                                                                                                                                                                                                                                                                                                                                                                            |                          |                            |                        |
| Negative                                                                                                                                                                                                                                                                                                                                                                                                                                                                                                                                                                                                                                                                                                                                                                                                                                                                                                                                                                                                                               | 14073 (100)              | 14134 (100)                | 28207 (100)            |
| Positive                                                                                                                                                                                                                                                                                                                                                                                                                                                                                                                                                                                                                                                                                                                                                                                                                                                                                                                                                                                                                               | 0                        | 0                          | 0                      |
| Missing                                                                                                                                                                                                                                                                                                                                                                                                                                                                                                                                                                                                                                                                                                                                                                                                                                                                                                                                                                                                                                | 0                        | 0                          | 0                      |
| Baseline RT-PCR                                                                                                                                                                                                                                                                                                                                                                                                                                                                                                                                                                                                                                                                                                                                                                                                                                                                                                                                                                                                                        |                          |                            |                        |
| Negative                                                                                                                                                                                                                                                                                                                                                                                                                                                                                                                                                                                                                                                                                                                                                                                                                                                                                                                                                                                                                               | 14073 (100)              | 14134 (100)                | 28207 (100)            |
| Positive                                                                                                                                                                                                                                                                                                                                                                                                                                                                                                                                                                                                                                                                                                                                                                                                                                                                                                                                                                                                                               | 0                        | 0                          | 0                      |
| Missing                                                                                                                                                                                                                                                                                                                                                                                                                                                                                                                                                                                                                                                                                                                                                                                                                                                                                                                                                                                                                                | 0                        | 0                          | 0                      |
| Baseline bAb Anti-SARS-CoV-2                                                                                                                                                                                                                                                                                                                                                                                                                                                                                                                                                                                                                                                                                                                                                                                                                                                                                                                                                                                                           |                          |                            |                        |
| Negative                                                                                                                                                                                                                                                                                                                                                                                                                                                                                                                                                                                                                                                                                                                                                                                                                                                                                                                                                                                                                               | 14073 (100)              | 14134 (100)                | 28207 (100)            |
| Positive                                                                                                                                                                                                                                                                                                                                                                                                                                                                                                                                                                                                                                                                                                                                                                                                                                                                                                                                                                                                                               | 0                        | 0                          | 0                      |
| Missing                                                                                                                                                                                                                                                                                                                                                                                                                                                                                                                                                                                                                                                                                                                                                                                                                                                                                                                                                                                                                                | 0                        | 0                          | 0                      |
| Risk Factor for Severe Covid-19 at Screening‡                                                                                                                                                                                                                                                                                                                                                                                                                                                                                                                                                                                                                                                                                                                                                                                                                                                                                                                                                                                          |                          |                            |                        |
| Chronic lung disease                                                                                                                                                                                                                                                                                                                                                                                                                                                                                                                                                                                                                                                                                                                                                                                                                                                                                                                                                                                                                   | 688(4.9)                 | 673 (4.8)                  | 1361 (4.8)             |
| Significant cardiac disease                                                                                                                                                                                                                                                                                                                                                                                                                                                                                                                                                                                                                                                                                                                                                                                                                                                                                                                                                                                                            | 694 (4.9)                | 711 (5.0)                  | 1405 (5.0)             |
| Severe obesity                                                                                                                                                                                                                                                                                                                                                                                                                                                                                                                                                                                                                                                                                                                                                                                                                                                                                                                                                                                                                         | 936 (6.7)                | 956 (6.8)                  | 1892 (6.7)             |
| Diabetes                                                                                                                                                                                                                                                                                                                                                                                                                                                                                                                                                                                                                                                                                                                                                                                                                                                                                                                                                                                                                               | 1345 (9.6)               | 1364 (9.7)                 | 2709 (9.6)             |
| Liver disease                                                                                                                                                                                                                                                                                                                                                                                                                                                                                                                                                                                                                                                                                                                                                                                                                                                                                                                                                                                                                          | 90 (0.6)                 | 95(0.7)                    | 185(0.7)               |
| HIV                                                                                                                                                                                                                                                                                                                                                                                                                                                                                                                                                                                                                                                                                                                                                                                                                                                                                                                                                                                                                                    | 77 (0.5)                 | 82 (0.6)                   | 159 (0.6)              |
| Body Mass Index, (kg/m <sup>2</sup> )                                                                                                                                                                                                                                                                                                                                                                                                                                                                                                                                                                                                                                                                                                                                                                                                                                                                                                                                                                                                  |                          |                            |                        |
| Mean (SD)                                                                                                                                                                                                                                                                                                                                                                                                                                                                                                                                                                                                                                                                                                                                                                                                                                                                                                                                                                                                                              | 29.27 (6.650)            | 29.28 (6.827)              | 29.28 (6.739)          |
| <p>bAb = binding antibody concentration; IRT = interactive response technology; RT-PCR = reverse transcription polymerase chain reaction. Internet-based randomization was used to randomize participants to treatment groups based on the information the Investigator entered regarding the age and potential comorbid conditions. *Based on stratification factor from IRT, participants who were &lt;65 years old were categorized as at risk for severe Covid-19 illness if they had at least 1 of the risk factors specified in the study protocol at screening. †Baseline SARS-CoV-2 status was positive if there was immunologic or virologic evidence of prior Covid-19, defined as positive RT-PCR test, or bAb against SARS-CoV-2 nucleocapsid above limit of detection; or lower limit of quantification at Day 1. Negative was defined as negative RT-PCR test and negative bAb against SARS-CoV-2 assay result at Day 1. ‡Participants could be under one or more categories and were counted once at each category.</p> |                          |                            |                        |

**Fig. S1. Study Disposition in Overall Randomized Set**

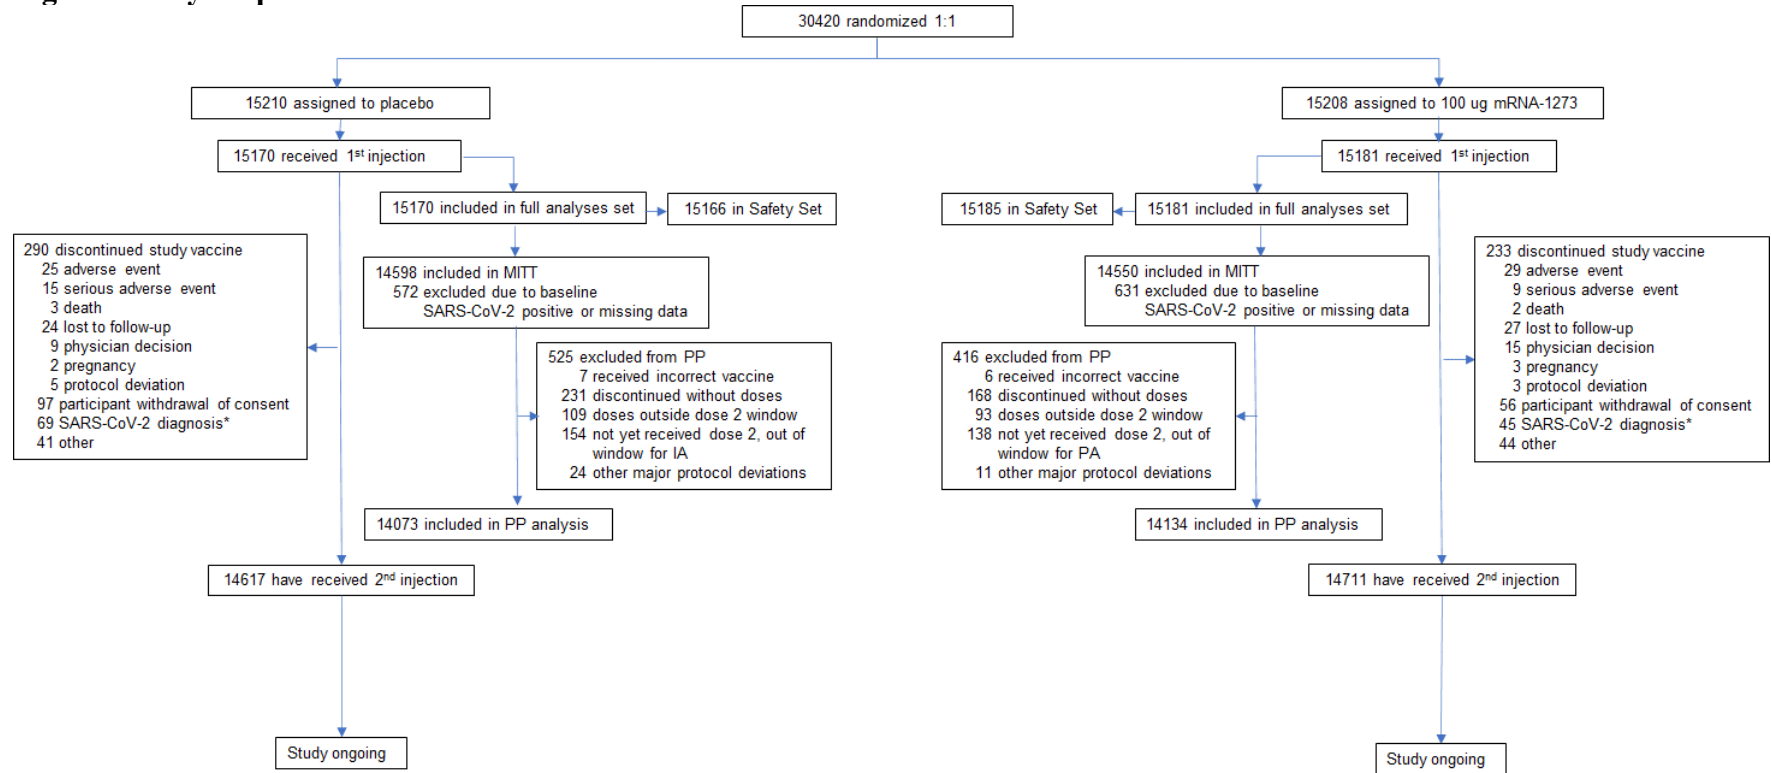

**Table S1. Primary and Secondary Objectives of the Trial**

| <b>Objectives and Endpoints</b>                                                                                                                            |                                                                                                                                                                                                                                                                                                                                                                                                                                                                                                                                                                                                                                                                                                                                                                                                                                                                                                                                                                                                                                                            |
|------------------------------------------------------------------------------------------------------------------------------------------------------------|------------------------------------------------------------------------------------------------------------------------------------------------------------------------------------------------------------------------------------------------------------------------------------------------------------------------------------------------------------------------------------------------------------------------------------------------------------------------------------------------------------------------------------------------------------------------------------------------------------------------------------------------------------------------------------------------------------------------------------------------------------------------------------------------------------------------------------------------------------------------------------------------------------------------------------------------------------------------------------------------------------------------------------------------------------|
| <b>Primary Objective</b>                                                                                                                                   | <b>Primary Endpoints</b>                                                                                                                                                                                                                                                                                                                                                                                                                                                                                                                                                                                                                                                                                                                                                                                                                                                                                                                                                                                                                                   |
| <p><b>Efficacy Objective (Primary):</b><br/>To demonstrate the efficacy of mRNA-1273 to prevent Covid-19.</p>                                              | <p><b>Efficacy Endpoints (Primary):</b> Vaccine efficacy of mRNA-1273 to prevent the first occurrence of Covid-19 starting 14 days after the second dose of investigational product (IP), where Covid-19 is defined as symptomatic disease based on the following criteria:</p> <ul style="list-style-type: none"> <li>• The participant must have experienced at least TWO of the following systemic symptoms: Fever (<math>\geq 38^{\circ}\text{C}</math>), chills, myalgia, headache, sore throat, new olfactory and taste disorder(s), OR</li> <li>• The participant must have experienced at least ONE of the following respiratory signs/symptoms: cough, shortness of breath or difficulty breathing, OR clinical or radiographical evidence of pneumonia; AND</li> <li>• The participant must have at least one NP swab, nasal swab, or saliva sample (or respiratory sample, if hospitalized) positive for SARS-CoV-2 by RT-PCR.</li> </ul>                                                                                                       |
| <p><b>Safety Objective (Primary):</b><br/>To evaluate the safety and reactogenicity of 2 injections of the mRNA-1273 vaccine given 28 days apart.</p>      | <p><b>Safety Endpoint (Primary):</b></p> <ul style="list-style-type: none"> <li>• Solicited local and systemic ARs through 7 days after each dose of IP.</li> <li>• Unsolicited AEs through 28 days after each dose of IP.</li> <li>• Medically attended adverse events (MAAEs) or AEs leading to withdrawal through the entire study period.</li> <li>• SAEs throughout the entire study period.</li> </ul>                                                                                                                                                                                                                                                                                                                                                                                                                                                                                                                                                                                                                                               |
| <b>Efficacy Objectives (Secondary)</b>                                                                                                                     | <b>Efficacy Endpoints (Secondary)</b>                                                                                                                                                                                                                                                                                                                                                                                                                                                                                                                                                                                                                                                                                                                                                                                                                                                                                                                                                                                                                      |
| <p>To evaluate the efficacy of mRNA-1273 to prevent severe Covid-19.</p>                                                                                   | <ul style="list-style-type: none"> <li>• Vaccine efficacy of mRNA-1273 to prevent severe Covid-19, defined as first occurrence of Covid-19 starting 14 days after the second dose of IP, (as per the primary endpoint) AND any of the following: <ul style="list-style-type: none"> <li>○ Clinical signs indicative of severe systemic illness, Respiratory Rate <math>\geq 30</math> per minute, Heart Rate <math>\geq 125</math> beats per minute, <math>\text{SpO}_2 \leq 93\%</math> on room air at sea level or <math>\text{PaO}_2/\text{FIO}_2 &lt; 300</math> mm Hg, OR</li> <li>○ Respiratory failure or Acute Respiratory Distress Syndrome (ARDS), (defined as needing high-flow oxygen, non-invasive or mechanical ventilation, or ECMO), evidence of shock (systolic blood pressure <math>&lt; 90</math> mmHg, diastolic BP <math>&lt; 60</math> mmHg or requiring vasopressors), OR</li> <li>○ Significant acute renal, hepatic or neurologic dysfunction, OR</li> <li>○ Admission to an intensive care unit or death.</li> </ul> </li> </ul> |
| <p>To evaluate the efficacy of mRNA-1273 to prevent serologically confirmed SARS-CoV-2 infection or Covid-19 regardless of symptomatology or severity.</p> | <p>Vaccine efficacy of mRNA-1273 to prevent the first occurrence of either Covid-19 or SARS-CoV-2 infection starting 14 days after the second IP dose. This endpoint is a combination of Covid-19, defined as for the primary endpoint, and asymptomatic SARS-CoV-2 infection, determined by seroconversion assessed by bAb levels against SARS-CoV-2 as measured by a ligand-binding assay specific to the SARS-CoV-2 nucleocapsid protein and with a negative nasopharyngeal (NP) swab sample for SARS-CoV-2 at Day 1.</p>                                                                                                                                                                                                                                                                                                                                                                                                                                                                                                                               |
| <p>To evaluate VE against a secondary definition of Covid-19.</p>                                                                                          | <p>Vaccine efficacy of mRNA-1273 to prevent the secondary case definition of Covid-19 starting 14 days after the second IP dose. The secondary case definition of Covid-19 is defined as the following systemic symptoms: fever (temperature <math>\geq 38^{\circ}\text{C}</math>), or chills, cough, shortness of breath or difficulty breathing, fatigue, muscle aches or body aches, headache, new loss of taste or smell, sore throat, nasal congestion or rhinorrhea, nausea or vomiting, or diarrhea AND a positive NP swab, nasal swab, or saliva sample (or respiratory sample, if hospitalized) for SARS-CoV-2 by RT-PCR.</p>                                                                                                                                                                                                                                                                                                                                                                                                                     |
| <p>To evaluate VE to prevent death caused by Covid-19.</p>                                                                                                 | <p>Vaccine efficacy of mRNA-1273 to prevent death due to a cause directly attributed to a complication of Covid-19, starting 14 days after the second IP dose.</p>                                                                                                                                                                                                                                                                                                                                                                                                                                                                                                                                                                                                                                                                                                                                                                                                                                                                                         |
| <p>To evaluate the efficacy of mRNA-1273 to prevent Covid-19 after the first dose of IP.</p>                                                               | <p>Vaccine efficacy of mRNA-1273 to prevent the first occurrence of Covid-19 starting 14 days after the first dose of IP.</p>                                                                                                                                                                                                                                                                                                                                                                                                                                                                                                                                                                                                                                                                                                                                                                                                                                                                                                                              |

|                                                                                                                                                   |                                                                                                                                                                                                                                                                                                                                                                                                                       |
|---------------------------------------------------------------------------------------------------------------------------------------------------|-----------------------------------------------------------------------------------------------------------------------------------------------------------------------------------------------------------------------------------------------------------------------------------------------------------------------------------------------------------------------------------------------------------------------|
| <p>To evaluate the efficacy of mRNA-1273 to prevent Covid-19 in all study participants, regardless of evidence of prior SARS-CoV-2 infection.</p> | <p>Vaccine efficacy of mRNA-1273 to prevent the first occurrence of Covid-19 starting 14 days after the second dose of IP regardless of evidence of prior SARS-CoV-2 infection determined by serologic titer against SARS-CoV-2 nucleocapsid (FAS analysis population).</p>                                                                                                                                           |
| <p>To evaluate the efficacy of mRNA-1273 to prevent asymptomatic SARS-CoV-2 infection.</p>                                                        | <p>Vaccine efficacy to prevent the first occurrence of SARS-CoV-2 infection in the absence of symptoms defining Covid-19 starting 14 days after the second IP dose. SARS-CoV-2 infection determined by seroconversion assessed by bAb levels against SARS-CoV-2 as measured by a ligand-binding assay specific to the SARS-CoV-2 nucleocapsid protein and with a negative NP swab sample for SARS-CoV-2 at Day 1.</p> |

**Table S2. Baseline Demographics and Characteristics by Randomized Strata Groups, Full Analysis Set**

| n (%)                                    | ≥18-<65 yr and not at risk |              |              | ≥18-<65 yr and at risk |              |              | ≥65 yr       |              |              | Overall      |              |              |
|------------------------------------------|----------------------------|--------------|--------------|------------------------|--------------|--------------|--------------|--------------|--------------|--------------|--------------|--------------|
|                                          | Placebo                    | mRNA-1273    | Total        | Placebo                | mRNA-1273    | Total        | Placebo      | mRNA-1273    | Total        | Placebo      | mRNA-1273    | Total        |
|                                          | N=8886                     | N=8888       | N=17774      | N=2535                 | N=2530       | N=5065       | N=3749       | N=3763       | N=7512       | N=15170      | N=15181      | N=30351      |
| Age at screening, yr mean (range)        | 43.8 (18-72)               | 44.0 (18-64) | 43.9 (18-72) | 49.2 (18-79)           | 48.9 (18-76) | 49.0 (18-79) | 70.7 (40-95) | 70.4 (64-95) | 70.6 (40-95) | 51.3 (18-95) | 51.4 (18-95) | 51.4 (18-95) |
| Sex                                      |                            |              |              |                        |              |              |              |              |              |              |              |              |
| Male                                     | 4632 (52.1)                | 4544 (51.1)  | 9176 (51.6)  | 1329 (52.4)            | 1305 (51.6)  | 2634 (52.0)  | 2101 (56.0)  | 2074 (55.1)  | 4175 (55.6)  | 8062 (53.1)  | 7923 (52.2)  | 15985 (52.7) |
| Female                                   | 4254 (47.9)                | 4344 (48.9)  | 8598 (48.4)  | 1206 (47.6)            | 1225 (48.4)  | 2431 (48.0)  | 1648 (44.0)  | 1689 (44.9)  | 3337 (44.4)  | 7108 (46.9)  | 7258 (47.8)  | 14366 (47.3) |
| Race                                     |                            |              |              |                        |              |              |              |              |              |              |              |              |
| White                                    | 6789 (76.4)                | 6756 (76.0)  | 13545 (76.2) | 1870 (73.8)            | 1900 (75.1)  | 3770 (74.4)  | 3336 (89.0)  | 3373 (89.6)  | 6709 (89.3)  | 11995 (79.1) | 12029 (79.2) | 24024 (79.2) |
| Black or African American                | 899 (10.1)                 | 968 (10.9)   | 1867 (10.5)  | 413 (16.3)             | 374 (14.8)   | 787 (15.5)   | 215 (5.7)    | 221 (5.9)    | 436 (5.8)    | 1527 (10.1)  | 1563 (10.3)  | 3090 (10.2)  |
| Asian                                    | 570 (6.4)                  | 501 (5.6)    | 1071 (6.0)   | 84 (3.3)               | 85 (3.4)     | 169 (3.3)    | 77 (2.1)     | 65 (1.7)     | 142 (1.9)    | 731 (4.8)    | 651 (4.3)    | 1382 (4.6)   |
| American Indian or Alaska Native         | 72 (0.8)                   | 65 (0.7)     | 137 (0.8)    | 23 (0.9)               | 26 (1.0)     | 49 (1.0)     | 26 (0.7)     | 21 (0.6)     | 47 (0.6)     | 121 (0.8)    | 112 (0.7)    | 233 (0.8)    |
| Native Hawaiian or Pacific Islander      | 20 (0.2)                   | 25 (0.3)     | 45 (0.3)     | 9 (0.4)                | 7 (0.3)      | 16 (0.3)     | 3 (<0.1)     | 3 (<0.1)     | 6 (<0.1)     | 32 (0.2)     | 35 (0.2)     | 67 (0.2)     |
| Multiracial                              | 232 (2.6)                  | 231 (2.6)    | 463 (2.6)    | 51 (2.0)               | 50 (2.0)     | 101 (2.0)    | 38 (1.0)     | 34 (0.9)     | 72 (1.0)     | 321 (2.1)    | 315 (2.1)    | 636 (2.1)    |
| Other                                    | 229 (2.6)                  | 233 (2.6)    | 462 (2.6)    | 54 (2.1)               | 61 (2.4)     | 115 (2.3)    | 33 (0.9)     | 27 (0.7)     | 60 (0.8)     | 316 (2.1)    | 321 (2.1)    | 637 (2.1)    |
| Not reported                             | 42 (0.5)                   | 67 (0.8)     | 109 (0.6)    | 1 (0.7)                | 16 (0.6)     | 34 (0.7)     | 13 (0.3)     | 13 (0.3)     | 26 (0.3)     | 73 (0.5)     | 96 (0.6)     | 169 (0.6)    |
| Unknown                                  | 33 (0.4)                   | 42 (0.5)     | 75 (0.4)     | 13 (0.5)               | 11 (0.4)     | 24 (0.5)     | 8 (0.2)      | 6 (0.2)      | 14 (0.2)     | 54 (0.4)     | 59 (0.4)     | 113 (0.4)    |
| Race and Ethnicity Group*                |                            |              |              |                        |              |              |              |              |              |              |              |              |
| White                                    | 4975 (56.0)                | 5005 (56.3)  | 9980 (56.1)  | 1426 (56.3)            | 1456 (57.5)  | 2882 (56.9)  | 3060 (81.6)  | 3068 (81.5)  | 6128 (81.6)  | 9461 (62.4)  | 9529 (62.8)  | 18990 (62.6) |
| Communities of color                     | 3903 (43.9)                | 3869 (43.5)  | 7772 (43.7)  | 1104 (43.6)            | 1068 (42.2)  | 2172 (42.9)  | 676 (18.0)   | 689 (18.3)   | 1365 (18.2)  | 5683 (37.5)  | 5626 (37.1)  | 11309 (37.3) |
| Missing                                  | 8 (<0.1)                   | 14 (0.2)     | 22 (0.1)     | 5 (0.2)                | 6 (0.2)      | 11 (0.2)     | 13 (0.3)     | 6 (0.2)      | 19 (0.3)     | 26 (0.2)     | 26 (0.2)     | 52 (0.2)     |
| Ethnicity                                |                            |              |              |                        |              |              |              |              |              |              |              |              |
| Hispanic or Latino                       | 2228 (25.1)                | 2209 (24.9)  | 4437 (25.0)  | 552 (21.8)             | 558 (22.1)   | 1110 (21.9)  | 334 (8.9)    | 354 (9.4)    | 688 (9.2)    | 3114 (20.5)  | 3121 (20.6)  | 6235 (20.5)  |
| Not Hispanic or Latino                   | 6585 (74.1)                | 6599 (74.2)  | 13184 (74.2) | 1960 (77.3)            | 1953 (77.2)  | 3913 (77.3)  | 3372 (89.9)  | 3366 (89.4)  | 6738 (89.7)  | 11917 (78.6) | 11918 (78.5) | 23835 (78.5) |
| Not Reported                             | 43 (0.5)                   | 58 (0.7)     | 101 (0.6)    | 15 (0.6)               | 14 (0.6)     | 29 (0.6)     | 27 (0.7)     | 32 (0.9)     | 59 (0.8)     | 85 (0.6)     | 104 (0.7)    | 189 (0.6)    |
| Unknown                                  | 30 (0.3)                   | 22 (0.2)     | 52 (0.3)     | 8 (0.3)                | 5 (0.2)      | 13 (0.3)     | 16 (0.4)     | 11 (0.3)     | 27 (0.4)     | 54 (0.4)     | 38 (0.3)     | 92 (0.3)     |
| BMI kg/m2, mean (SD)                     | 28.0 (5.2)                 | 28.0 (5.3)   | 28.0 (5.2)   | 35.0 (9.2)             | 35.2 (9.6)   | 35.1 (9.4)   | 28.7 (5.9)   | 28.7 (5.9)   | 28.7 (5.9)   | 29.3 (6.7)   | 29.3 (6.9)   | 29.3 (6.8)   |
| At risk for severe Covid-19 at screening |                            |              |              |                        |              |              |              |              |              |              |              |              |
| Yes                                      | 141 (1.6)                  | 127 (1.4)    | 268 (1.5)    | 2163 (85.3)            | 2171 (85.8)  | 4334 (85.6)  | 1114 (29.7)  | 1101 (29.3)  | 2215 (29.5)  | 3418 (22.5)  | 3399 (22.4)  | 6817 (22.5)  |
| No                                       | 8745 (98.4)                | 8761 (98.6)  | 17506 (98.5) | 372 (14.7)             | 359 (14.2)   | 731 (14.4)   | 2635 (70.3)  | 2662 (70.7)  | 5297 (70.5)  | 11752 (77.5) | 11782 (77.6) | 23534 (77.5) |

|                                              |              |             |               |             |             |             |             |             |             |              |              |              |
|----------------------------------------------|--------------|-------------|---------------|-------------|-------------|-------------|-------------|-------------|-------------|--------------|--------------|--------------|
| Baseline RT-PCR                              |              |             |               |             |             |             |             |             |             |              |              |              |
| Negative                                     | 8755 (98.5)  | 8728 (98.2) | 17483 (98.4)  | 2474 (97.6) | 2478 (97.9) | 4952 (97.8) | 3694 (98.5) | 3711 (98.6) | 7405 (98.6) | 14923 (98.4) | 14917 (98.3) | 29840 (98.3) |
| Positive                                     | 65 (0.7)     | 64 (0.7)    | 129 (0.7)     | 20 (0.8)    | 16 (0.6)    | 36 (0.7)    | 10 (0.3)    | 7 (0.2)     | 17 (0.2)    | 95 (0.6)     | 87 (0.6)     | 182 (0.6)    |
| Missing                                      | 66 (0.7)     | 96 (1.1)    | 162 (0.9)     | 41 (1.6)    | 36 (1.4)    | 77 (1.5)    | 45 (1.2)    | 45 (1.2)    | 90 (1.2)    | 152 (1.0)    | 177 (1.2)    | 329 (1.1)    |
| Baseline bAb Anti-SARS-CoV-2                 |              |             |               |             |             |             |             |             |             |              |              |              |
| Negative                                     | 8595 (96.7)  | 8555 (96.3) | 17150 (96.5)  | 2449 (96.6) | 2451 (96.9) | 4900 (96.7) | 3682 (98.2) | 3684 (97.9) | 7366 (98.1) | 14726 (97.1) | 14690 (96.8) | 29416 (96.9) |
| Positive                                     | 216 (2.4)    | 230 (2.6)   | 44 (2.5)      | 59 (2.3)    | 42 (1.7)    | 101 (2.0)   | 28 (0.7)    | 33 (0.9)    | 61 (0.8)    | 303 (2.0)    | 305 (2.0)    | 608 (2.0)    |
| Missing                                      | 75 (0.8)     | 103 (1.2)   | 178 (1.0)     | 27 (1.1)    | 37 (1.5)    | 64 (1.3)    | 39 (1.0)    | 46 (1.2)    | 85 (1.1)    | 141 (0.9)    | 186 (1.2)    | 327 (1.1)    |
| Baseline SARS-CoV-2 Status†                  |              |             |               |             |             |             |             |             |             |              |              |              |
| Negative                                     | 8532 (96.0)  | 8468 (95.3) | 17000 (95.6)  | 2415 (95.3) | 2427 (95.9) | 4842 (95.6) | 3651 (97.4) | 3655 (97.1) | 7306 (97.3) | 14598 (96.2) | 14550 (95.8) | 29148 (96.0) |
| Positive                                     | 239 (2.7)    | 260 (2.9)   | 499 (2.8)     | 65 (2.6)    | 47 (1.9)    | 112 (2.2)   | 33 (0.9)    | 36 (1.0)    | 69 (0.9)    | 337 (2.2)    | 343 (2.3)    | 680 (2.2)    |
| Missing                                      | 115 (1.3)    | 160 (1.8)   | 275 (1.5)     | 55 (2.2)    | 56 (2.2)    | 111 (2.2)   | 65 (1.7)    | 72 (1.9)    | 137 (1.8)   | 235 (1.5)    | 288 (1.9)    | 523 (1.7)    |
| Age Subgroup at Screening (yr)               |              |             |               |             |             |             |             |             |             |              |              |              |
| ≥18 and <65                                  | 8885 (>99.9) | 8888 (100)  | 17773 (>99.9) | 2532 (99.9) | 2524 (99.8) | 5056 (99.8) | 1 (<0.1)    | 1 (<0.1)    | 2 (<0.1)    | 11418 (75.3) | 11413 (75.2) | 22831 (75.2) |
| ≥65 and <75                                  | 1 (<0.1)     | 0           | 1 (<0.1)      | 2 (<0.1)    | 5 (0.2)     | 7 (0.1)     | 3008 (80.2) | 3105 (82.5) | 6113 (81.4) | 3011 (19.8)  | 3110 (20.5)  | 6121 (20.2)  |
| ≥75 and <85                                  | 0            | 0           | 0             | 1 (<0.1)    | 1 (<0.1)    | 2 (<0.1)    | 691 (18.4)  | 616 (16.4)  | 1307 (17.4) | 692 (4.6)    | 617 (4.1)    | 1309 (4.3)   |
| ≥85 Years                                    | 0            | 0           | 0             | 0           | 0           | 0           | 49 (1.3)    | 41 (1.1)    | 90 (1.2)    | 49 (0.3)     | 41 (0.3)     | 90 (0.3)     |
| Risk Factor for Severe Covid-19 at Screening |              |             |               |             |             |             |             |             |             |              |              |              |
| Chronic lung disease                         | 17 (0.2)     | 19 (0.2)    | 36 (0.2)      | 485 (19.1)  | 455 (18.0)  | 940 (18.6)  | 242 (6.5)   | 236 (6.3)   | 478 (6.4)   | 744 (4.9)    | 710 (4.7)    | 1454 (4.8)   |
| Significant cardiac disease                  | 11 (0.1)     | 12 (0.1)    | 23 (0.1)      | 285 (11.2)  | 306 (12.1)  | 591 (11.7)  | 448 (11.9)  | 434 (11.5)  | 882 (11.7)  | 744 (4.9)    | 752 (5.0)    | 1496 (4.9)   |
| Severe obesity                               | 69 (0.8)     | 59 (0.7)    | 128 (0.7)     | 809 (31.9)  | 807 (31.9)  | 1616 (31.9) | 143 (3.8)   | 159 (4.2)   | 302 (4.0)   | 1021 (6.7)   | 1025 (6.8)   | 2046 (6.7)   |
| Diabetes                                     | 33 (0.4)     | 32 (0.4)    | 65 (0.4)      | 871 (34.4)  | 876 (34.6)  | 1747 (34.5) | 536 (14.3)  | 527 (14.0)  | 1063 (14.2) | 1440 (9.5)   | 1435 (9.5)   | 2875 (9.5)   |
| Liver disease                                | 8 (<0.1)     | 6 (<0.1)    | 14 (<0.1)     | 62 (2.4)    | 76 (3.0)    | 138 (2.7)   | 26 (0.7)    | 18 (0.5)    | 44 (0.6)    | 96 (0.6)     | 100 (0.7)    | 196 (0.6)    |
| HIV                                          | 13 (0.1)     | 14 (0.2)    | 27 (0.2)      | 59 (2.3)    | 62 (2.5)    | 121 (2.4)   | 15 (0.4)    | 16 (0.4)    | 31 (0.4)    | 87 (0.6)     | 92 (0.6)     | 179 (0.6)    |
| Occupational Risk                            | 7962 (89.6)  | 7929 (89.2) | 15891 (89.4)  | 2165 (85.4) | 2144 (84.7) | 4309 (85.1) | 2378 (63.4) | 2356 (62.6) | 4734 (63.0) | 12505 (82.4) | 12429 (81.9) | 24934 (82.2) |
| Healthcare Workers                           | 2734 (30.8)  | 2735 (30.8) | 5469 (30.8)   | 593 (23.4)  | 595 (23.5)  | 1188 (23.5) | 504 (13.4)  | 460 (12.2)  | 964 (12.8)  | 3831 (25.3)  | 3790 (25.0)  | 7621 (25.1)  |
| Emergency Response                           | 220 (2.5)    | 233 (2.6)   | 453 (2.5)     | 58 (2.3)    | 49 (1.9)    | 107 (2.1)   | 19 (0.5)    | 20 (0.5)    | 39 (0.5)    | 297 (2.0)    | 302 (2.0)    | 599 (2.0)    |
| Retail/Restaurant                            | 689 (7.8)    | 683 (7.7)   | 1372 (7.7)    | 186 (7.3)   | 171 (6.8)   | 357 (7.0)   | 99 (2.6)    | 100 (2.7)   | 199 (2.6)   | 974 (6.4)    | 954 (6.3)    | 1928 (6.4)   |
| Manufacturing and Production                 | 306 (3.4)    | 289 (3.3)   | 595 (3.3)     | 85 (3.4)    | 102 (4.0)   | 187 (3.7)   | 30 (0.8)    | 34 (0.9)    | 64 (0.9)    | 421 (2.8)    | 425 (2.8)    | 846 (2.8)    |
| Warehouse Shipping and Fulfillment           | 121 (1.4)    | 138 (1.6)   | 259 (1.5)     | 42 (1.7)    | 44 (1.7)    | 86 (1.7)    | 12 (0.3)    | 9 (0.2)     | 21 (0.3)    | 175 (1.2)    | 19 (1.3)     | 366 (1.2)    |



|                                           |             |             |              |             |             |             |             |             |             |              |              |              |
|-------------------------------------------|-------------|-------------|--------------|-------------|-------------|-------------|-------------|-------------|-------------|--------------|--------------|--------------|
| Transportation and Delivery               | 313 (3.5)   | 335 (3.8)   | 648 (3.6)    | 9 (3.9)     | 97 (3.8)    | 195 (3.8)   | 62 (1.7)    | 50 (1.3)    | 112 (1.5)   | 473 (3.1)    | 482 (3.2)    | 955 (3.1)    |
| Border Protection and Military Personnel  | 51 (0.6)    | 53 (0.6)    | 104 (0.6)    | 11 (0.4)    | 13 (0.5)    | 24 (0.5)    | 6 (0.2)     | 3 (<0.1)    | 9 (0.1)     | 6 (0.4)      | 69 (0.5)     | 137 (0.5)    |
| Personal Care and In-Home Services        | 330 (3.7)   | 299 (3.4)   | 629 (3.5)    | 78 (3.1)    | 103 (4.1)   | 181 (3.6)   | 61 (1.6)    | 67 (1.8)    | 128 (1.7)   | 469 (3.1)    | 469 (3.1)    | 938 (3.1)    |
| Hospitality and Tourism Workers           | 149 (1.7)   | 163 (1.8)   | 312 (1.8)    | 40 (1.6)    | 38 (1.5)    | 78 (1.5)    | 43 (1.1)    | 36 (1.0)    | 79 (1.1)    | 232 (1.5)    | 237 (1.6)    | 469 (1.5)    |
| Pastoral, Social or Public Health Workers | 264 (3.0)   | 296 (3.3)   | 560 (3.2)    | 101 (4.0)   | 90 (3.6)    | 19 (3.8)    | 138 (3.7)   | 147 (3.9)   | 285 (3.8)   | 503 (3.3)    | 533 (3.5)    | 1036 (3.4)   |
| Educators and Students                    | 1113 (12.5) | 1083 (12.2) | 2196 (12.4)  | 270 (10.7)  | 276 (10.9)  | 546 (10.8)  | 169 (4.5)   | 184 (4.9)   | 353 (4.7)   | 1552 (10.2)  | 1543 (10.2)  | 3095 (10.2)  |
| Other                                     | 2591 (29.2) | 2582 (29.1) | 5173 (29.1)  | 789 (31.1)  | 810 (32.0)  | 1599 (31.6) | 1423 (38.0) | 1426 (37.9) | 2849 (37.9) | 4803 (31.7)  | 4818 (31.7)  | 9621 (31.7)  |
| Location and Living Circumstances Risk    | 7444 (83.8) | 7481 (84.2) | 14925 (84.0) | 2080 (82.1) | 2046 (80.9) | 4126 (81.5) | 3089 (82.4) | 3119 (82.9) | 6208 (82.6) | 12613 (83.1) | 12646 (83.3) | 25259 (83.2) |
| Nursing Home or Assisted Living Facility  | 6 (<0.1)    | 11 (0.1)    | 17 (<0.1)    | 3 (0.1)     | 11 (0.4)    | 14 (0.3)    | 20 (0.5)    | 11 (0.3)    | 31 (0.4)    | 29 (0.2)     | 33 (0.2)     | 62 (0.2)     |
| Multi-Family Dwelling                     | 266 (3.0)   | 304 (3.4)   | 570 (3.2)    | 80 (3.2)    | 92 (3.6)    | 172 (3.4)   | 63 (1.7)    | 66 (1.8)    | 129 (1.7)   | 409 (2.7)    | 462 (3.0)    | 871 (2.9)    |
| High Density Housing                      | 873 (9.8)   | 839 (9.4)   | 1712 (9.6)   | 195 (7.7)   | 195 (7.7)   | 390 (7.7)   | 239 (6.4)   | 251 (6.7)   | 490 (6.5)   | 1307 (8.6)   | 1285 (8.5)   | 2592 (8.5)   |
| Low Density, Multi-Family Setting         | 952 (10.7)  | 934 (10.5)  | 1886 (10.6)  | 275 (10.8)  | 301 (11.9)  | 576 (11.4)  | 255 (6.8)   | 244 (6.5)   | 499 (6.6)   | 1482 (9.8)   | 1479 (9.7)   | 2961 (9.8)   |
| Single Family Home                        | 4739 (53.3) | 4771 (53.7) | 9510 (53.5)  | 1366 (53.9) | 1288 (50.9) | 2654 (52.4) | 2245 (59.9) | 2270 (60.3) | 4515 (60.1) | 8350 (55.0)  | 8329 (54.9)  | 16679 (55.0) |
| Other                                     | 1306 (14.7) | 1329 (15.0) | 2635 (14.8)  | 331 (13.1)  | 315 (12.5)  | 646 (12.8)  | 528 (14.1)  | 545 (14.5)  | 1073 (14.3) | 2165 (14.3)  | 2189 (14.4)  | 4354 (14.3)  |

Percentages are based on the number of participants in full analysis set (FAS), presented for overall and 3 age stratification groups. Baseline SARS-CoV-2 status was positive if there was immunologic or virologic evidence of prior Covid-19, defined as positive RT-PCR test or positive bAb result at day 1; negative was defined as negative RT-PCR test and negative bAb result at day 1. \*White was defined as white and non-Hispanic, and communities of color includes all the others whose race or ethnicity is not unknown, unreported or missing. †Baseline SARS-CoV-2 Status was considered positive if there was immunologic or virologic evidence of prior Covid-19, defined as positive RT-PCR test or bAb result at day 1; negative was defined as negative RT-PCR test and bAb results at day 1. Age and health risk for severe Covid-19 are derived from age and risk factors collected on case report form. Note that some participants were incorrectly stratified on the basis of Covid-19 risk.

**Table S3. Solicited Adverse Reactions Within 7 Days After First Vaccination by Grade, Solicited Safety Set**

| Adverse reaction<br>Vaccination 1<br>n (%) | Overall Safety Set |              |              | ≥18-<65 years |              |              | ≥65 years   |             |             |
|--------------------------------------------|--------------------|--------------|--------------|---------------|--------------|--------------|-------------|-------------|-------------|
|                                            | Placebo            | mRNA-1273    | Total        | Placebo       | mRNA-1273    | Total        | Placebo     | mRNA-1273   | Total       |
|                                            | (N=15155)          | (N=15168)    | (N=30323)    | (N=11407)     | (N=11406)    | (N=22813)    | N=3748      | N=3762      | N=7510      |
| Any solicited AR                           | 7284 (48)          | 13319 (87.8) | 20603 (67.9) | 5738 (50.3)   | 10261 (90.0) | 15999 (70.1) | 1546 (41.2) | 3058 (81.3) | 4604 (61.3) |
| Grade 1                                    | 5147 (34.0)        | 9342 (61.6)  | 14489 (47.8) | 4003 (35.1)   | 6959 (61.0)  | 10962 (48.1) | 1144 (30.5) | 2383 (63.3) | 3527 (47.0) |
| Grade 2                                    | 1770 (11.7)        | 3124 (20.6)  | 4894 (16.1)  | 1459 (12.8)   | 2593 (22.7)  | 4052 (17.8)  | 311 (8.3)   | 531 (14.1)  | 842 (11.2)  |
| Grade 3                                    | 361(2.4)           | 848 (5.6)    | 1209 (4.0)   | 272 (2.4)     | 704 (6.2)    | 976 (4.3)    | 89 (2.4)    | 144 (3.8)   | 233 (3.1)   |
| Grade 4                                    | 6 (<0.1)           | 5 (<0.1)     | 11 (<0.1)    | 4 (<0.1)      | 5 (<0.1)     | 9 (<0.1)     | 2 (<0.1)    | 0           | 2 (<0.1)    |
| Any Local AR                               | 2997 (19.8)        | 12765 (84.2) | 15762 (52.0) | 2430 (21.3)   | 9960 (87.4)  | 12390 (54.3) | 567 (15.1)  | 2805 (74.6) | 3372 (44.9) |
| Grade 1                                    | 2837 (18.7)        | 10731 (70.8) | 13568 (44.8) | 2333 (20.5)   | 8154 (71.5)  | 10487 (46.0) | 504 (13.5)  | 2577 (68.5) | 3081 (41.0) |
| Grade 2                                    | 82 (0.5)           | 1505 (9.9)   | 1587 (5.2)   | 58 (0.5)      | 1354 (11.9)  | 1412 (6.2)   | 24 (0.6)    | 151 (4.0)   | 175 (2.3)   |
| Grade 3                                    | 78 (0.5)           | 529 (3.5)    | 607 (2.0)    | 39 (0.3)      | 452 (4.0)    | 491 (2.2)    | 39 (1.0)    | 77 (2.0)    | 116 (1.5)   |
| Grade 4                                    | 0                  | 0            | 0            | 0             | 0            | 0            | 0           | 0           | 0           |
| Local AR                                   |                    |              |              |               |              |              |             |             |             |
| Pain                                       | 2658 (17.5)        | 12690 (83.7) | 15348 (50.6) | 2177 (19.1)   | 9908 (86.9)  | 12085 (53.0) | 481 (12.8)  | 2782 (74.0) | 3263 (43.5) |
| Grade 1                                    | 2549 (16.8)        | 10990 (72.5) | 13539 (44.7) | 2114 (18.5)   | 8362 (73.3)  | 10476 (45.9) | 435 (11.6)  | 2628 (69.9) | 3063 (40.8) |
| Grade 2                                    | 54 (0.4)           | 1284 (8.5)   | 1338 (4.4)   | 40 (0.4)      | 1180 (10.3)  | 1220 (5.3)   | 14 (0.4)    | 104 (2.8)   | 118 (1.6)   |
| Grade 3                                    | 55 (0.4)           | 416 (2.7)    | 471 (1.6)    | 23 (0.2)      | 366 (3.2)    | 389 (1.7)    | 32 (0.9)    | 50 (1.3)    | 82 (1.1)    |
| Erythema                                   | 67 (0.4)           | 430 (2.8)    | 497 (1.6)    | 47 (0.4)      | 344 (3.0)    | 391 (1.7)    | 20 (0.5)    | 86 (2.3)    | 106 (1.4)   |
| Grade 1                                    | 47 (0.3)           | 267 (1.8)    | 314 (1.0)    | 32 (0.3)      | 212 (1.9)    | 244 (1.1)    | 15 (0.4)    | 55 (1.5)    | 70 (0.9)    |
| Grade 2                                    | 7 (<0.1)           | 121 (0.8)    | 128 (0.4)    | 4 (<0.1)      | 98 (0.9)     | 102 (0.4)    | 3 (<0.1)    | 23 (0.6)    | 26 (0.3)    |
| Grade 3                                    | 13 (<0.1)          | 42 (0.3)     | 55 (0.2)     | 11 (<0.1)     | 34 (0.3)     | 45 (0.2)     | 2 (<0.1)    | 8 (0.2)     | 10 (0.1)    |
| Swelling                                   | 52 (0.3)           | 932 (6.1)    | 984 (3.2)    | 34 (0.3)      | 767 (6.7)    | 801 (3.5)    | 18 (0.5)    | 165 (4.4)   | 183 (2.4)   |
| Grade 1                                    | 39 (0.3)           | 605 (4.0)    | 644 (2.1)    | 28 (0.2)      | 500 (4.4)    | 528 (2.3)    | 11 (0.3)    | 105 (2.8)   | 116 (1.5)   |
| Grade 2                                    | 7 (<0.1)           | 245 (1.6)    | 252 (0.8)    | 3 (<0.1)      | 205 (1.8)    | 208 (0.9)    | 4 (0.1)     | 40 (1.1)    | 44 (0.6)    |
| Grade 3                                    | 6 (<0.1)           | 82 (0.5)     | 88 (0.3)     | 3 (<0.1)      | 62 (0.5)     | 65 (0.3)     | 3 (<0.1)    | 20 (0.5)    | 23 (0.3)    |
| Axillary swelling/tenderness*              | 722 (4.8)          | 1553 (10.2)  | 2275 (7.5)   | 567 (5.0)     | 1322 (11.6)  | 1889 (8.3)   | 155 (4.1)   | 231 (6.1)   | 386 (5.1)   |
| Grade 1                                    | 668 (4.4)          | 1395 (9.2)   | 2063 (6.8)   | 534 (4.7)     | 1181 (10.4)  | 1715 (7.5)   | 134 (3.6)   | 214 (5.7)   | 348 (4.6)   |
| Grade 2                                    | 27 (0.2)           | 109 (0.7)    | 136 (0.4)    | 20 (0.2)      | 104 (0.9)    | 124 (0.5)    | 7 (0.2)     | 5 (0.1)     | 12 (0.2)    |
| Grade 3                                    | 27 (0.2)           | 49 (0.3)     | 76 (0.3)     | 13 (0.1)      | 37 (0.3)     | 50 (0.2)     | 14 (0.4)    | 12 (0.3)    | 26 (0.3)    |
| Any Systemic AR                            | 6399 (42.2)        | 8320 (54.9)  | 14719 (48.5) | 5065 (44.4)   | 6503 (57.0)  | 11568 (50.7) | 1334 (35.6) | 1817 (48.3) | 3151 (42.0) |
| Grade 1                                    | 4346 (28.7)        | 5372 (35.4)  | 9718 (32.0)  | 3375 (29.6)   | 4092 (35.9)  | 7467 (32.7)  | 971 (25.9)  | 1280 (34.0) | 2251 (30.0) |
| Grade 2                                    | 1739 (11.5)        | 2496 (16.5)  | 4235 (14.0)  | 1438 (12.6)   | 2043 (17.9)  | 3481 (15.3)  | 301 (8.0)   | 453 (12.0)  | 754 (10.0)  |
| Grade 3                                    | 308 (2.0)          | 447 (2.9)    | 755 (2.5)    | 248 (2.2)     | 363 (3.2)    | 611 (2.7)    | 60 (1.6)    | 84 (2.2)    | 144 (1.9)   |
| Grade 4                                    | 6 (<0.1)           | 5 (<0.1)     | 11 (<0.1)    | 4 (<0.1)      | 5 (<0.1)     | 9 (<0.1)     | 2 (<0.1)    | 0           | 2 (<0.1)    |
| Systemic AR                                |                    |              |              |               |              |              |             |             |             |
| Fever                                      | 44 (0.3)           | 115 (0.8)    | 159 (0.5)    | 37 (0.3)      | 105 (0.9)    | 142 (0.6)    | 7 (0.2)     | 10 (0.3)    | 17 (0.2)    |
| Grade 1                                    | 29 (0.2)           | 74 (0.5)     | 103 (0.3)    | 26 (0.2)      | 67 (0.6)     | 93 (0.4)     | 3 (<0.1)    | 7 (0.2)     | 10 (0.1)    |
| Grade 2                                    | 7 (<0.1)           | 26 (0.2)     | 33 (0.1)     | 6 (<0.1)      | 24 (0.2)     | 30 (0.1)     | 1 (<0.1)    | 2 (<0.1)    | 3 (<0.1)    |
| Grade 3                                    | 2 (<0.1)           | 11 (<0.1)    | 13 (<0.1)    | 1 (<0.1)      | 10 (<0.1)    | 11 (<0.1)    | 1 (<0.1)    | 1 (<0.1)    | 2 (<0.1)    |

|                 |             |             |             |             |             |             |            |             |             |
|-----------------|-------------|-------------|-------------|-------------|-------------|-------------|------------|-------------|-------------|
| Grade 4         | 6 (<0.1)    | 4 (<0.1)    | 10 (<0.1)   | 4 (<0.1)    | 4 (<0.1)    | 8 (<0.1)    | 2 (<0.1)   | 0           | 2 (<0.1)    |
| Headache        | 4027 (26.6) | 4951 (32.7) | 8978 (29.6) | 3304 (29.0) | 4030 (35.3) | 7334 (32.2) | 723 (19.3) | 921 (24.5)  | 1644 (21.9) |
| Grade 1         | 3306 (21.8) | 3953 (26.1) | 7259 (23.9) | 2676 (23.5) | 3174 (27.8) | 5850 (25.7) | 630 (16.8) | 779 (20.7)  | 1409 (18.8) |
| Grade 2         | 525 (3.5)   | 727 (4.8)   | 1252 (4.1)  | 466 (4.1)   | 637 (5.6)   | 1103 (4.8)  | 59 (1.6)   | 90 (2.4)    | 149 (2.0)   |
| Grade 3         | 196 (1.3)   | 271 (1.8)   | 467 (1.5)   | 162 (1.4)   | 219 (1.9)   | 381 (1.7)   | 34 (0.9)   | 52 (1.4)    | 86 (1.1)    |
| Fatigue         | 4133 (27.3) | 5635 (37.2) | 9768 (32.2) | 3282 (28.8) | 4384 (38.4) | 7666 (33.6) | 851 (22.7) | 1251 (33.3) | 2102 (28.0) |
| Grade 1         | 2709 (17.9) | 3599 (23.7) | 6308 (20.8) | 2104 (18.4) | 2744 (24.1) | 4848 (21.3) | 605 (16.2) | 855 (22.7)  | 1460 (19.5) |
| Grade 2         | 1319 (8.7)  | 1885 (12.4) | 3204 (10.6) | 1095 (9.6)  | 1519 (13.3) | 2614 (11.5) | 224 (6.0)  | 366 (9.7)   | 590 (7.9)   |
| Grade 3         | 105 (0.7)   | 150 (1.0)   | 255 (0.8)   | 83 (0.7)    | 120 (1.1)   | 203 (0.9)   | 22 (0.6)   | 30 (0.8)    | 52 (0.7)    |
| Grade 4         | 0           | 1 (<0.1)    | 1 (<0.1)    | 0           | 1 (<0.1)    | 1 (<0.1)    | 0          | 0           | 0           |
| Myalgia         | 2071 (13.7) | 3441 (22.7) | 5512 (18.2) | 1628 (14.3) | 2699 (23.7) | 4327 (19.0) | 443 (11.8) | 742 (19.7)  | 1185 (15.8) |
| Grade 1         | 1567 (10.3) | 2445 (16.1) | 4012 (13.2) | 1205 (10.6) | 1876 (16.5) | 3081 (13.5) | 362 (9.7)  | 569 (15.1)  | 931 (12.4)  |
| Grade 2         | 457 (3.0)   | 906 (6.0)   | 1363 (4.5)  | 385 (3.4)   | 750 (6.6)   | 1135 (5.0)  | 72 (1.9)   | 156 (4.1)   | 228 (3.0)   |
| Grade 3         | 47 (0.3)    | 90 (0.6)    | 137 (0.5)   | 38 (0.3)    | 73 (0.6)    | 111 (0.5)   | 9 (0.2)    | 17 (0.5)    | 26 (0.3)    |
| Arthralgia      | 1783 (11.8) | 2511 (16.6) | 4294 (14.2) | 1327 (11.6) | 1893 (16.6) | 3220 (14.1) | 456 (12.2) | 618 (16.4)  | 1074 (14.3) |
| Grade 1         | 1341 (8.9)  | 1846 (12.2) | 3187 (10.5) | 970 (8.5)   | 1371 (12.0) | 2341 (10.3) | 371 (9.9)  | 475 (12.6)  | 846 (11.3)  |
| Grade 2         | 405 (2.7)   | 604 (4.0)   | 1009 (3.3)  | 328 (2.9)   | 474 (4.2)   | 802 (3.5)   | 77 (2.1)   | 130 (3.5)   | 207 (2.8)   |
| Grade 3         | 37 (0.2)    | 60 (0.4)    | 97 (0.3)    | 29 (0.3)    | 47 (0.4)    | 76 (0.3)    | 8 (0.2)    | 13 (0.3)    | 21 (0.3)    |
| Grade 4         | 0           | 1 (<0.1)    | 1 (<0.1)    | 0           | 1 (<0.1)    | 1 (<0.1)    | 0          | 0           | 0           |
| Nausea/vomiting | 1074 (7.1)  | 1262 (8.3)  | 2336 (7.7)  | 908 (8.0)   | 1068 (9.4)  | 1976 (8.7)  | 166 (4.4)  | 194 (5.2)   | 360 (4.8)   |
| Grade 1         | 890 (5.9)   | 1048 (6.9)  | 1938 (6.4)  | 752 (6.6)   | 889 (7.8)   | 1641 (7.2)  | 138 (3.7)  | 159 (4.2)   | 297 (4.0)   |
| Grade 2         | 172 (1.1)   | 204 (1.3)   | 376 (1.2)   | 148 (1.3)   | 173 (1.5)   | 321 (1.4)   | 24 (0.6)   | 31 (0.8)    | 55 (0.7)    |
| Grade 3         | 12 (<0.1)   | 10 (<0.1)   | 22 (<0.1)   | 8 (<0.1)    | 6 (<0.1)    | 14 (<0.1)   | 4 (0.1)    | 4 (0.1)     | 8 (0.1)     |
| Chills          | 878 (5.8)   | 1253 (8.3)  | 2131 (7.0)  | 730 (6.4)   | 1051 (9.2)  | 1781 (7.8)  | 148 (4.0)  | 202 (5.4)   | 350 (4.7)   |
| Grade 1         | 706 (4.7)   | 940 (6.2)   | 1646 (5.4)  | 584 (5.1)   | 781 (6.8)   | 1365 (6.0)  | 122 (3.3)  | 159 (4.2)   | 281 (3.7)   |
| Grade 2         | 158 (1.0)   | 289 (1.9)   | 447 (1.5)   | 138 (1.2)   | 253 (2.2)   | 391 (1.7)   | 20 (0.5)   | 36 (1.0)    | 56 (0.7)    |
| Grade 3         | 14 (<0.1)   | 24 (0.2)    | 38 (0.1)    | 8 (<0.1)    | 17 (0.1)    | 25 (0.1)    | 6 (0.2)    | 7 (0.2)     | 13 (0.2)    |

n=Number of exposed participants who submitted any for the event; percentages are based on the number of exposed participants who submitted any data for the event in the solicited safety set. Any = Grade 1 or higher. Toxicity grade for Erythema (Redness) is defined as: G1 = 25 - 50 mm; G2 = 51 -100 mm; G3 = >100 mm. Toxicity grade for fever is defined as: G1 = 38 - 38.4 C; G2 = 38.5 - 38.9 C; G3 = 39 -40 C; G4 = >40 C. \*Localized axillary swelling or tenderness ipsilateral to the vaccination arm.

**Table S4. Solicited Adverse Reactions Within 7 Days After Second Vaccination by Grade, Solicited Safety Set**

| Adverse reaction<br>Vaccination 2<br>n (%) | Overall Safety Set |              |              | ≥18-<65 years |              |              | ≥65 years   |             |             |
|--------------------------------------------|--------------------|--------------|--------------|---------------|--------------|--------------|-------------|-------------|-------------|
|                                            | Placebo            | mRNA         | Total        | Placebo       | mRNA-1273    | Total        | Placebo     | mRNA-1273   | Total       |
|                                            | (N=14566)          | (N=14677)    | (N=29243)    | (N=10918)     | (N=10985)    | (N=21903)    | N=3648      | N=3692      | 7340        |
| Any solicited AR                           | 6232 (42.8)        | 13534 (92.2) | 19766 (67.6) | 4902 (44.9)   | 10231 (93.1) | 15133 (69.1) | 1330 (36.5) | 3303 (89.5) | 4633 (63.1) |
| Grade 1                                    | 4354 (29.9)        | 4855 (33.1)  | 9209 (31.5)  | 3397 (31.1)   | 3294 (30.0)  | 6691 (30.5)  | 957 (26.2)  | 1561 (42.3) | 2518 (34.3) |
| Grade 2                                    | 1534 (10.5)        | 5781 (39.4)  | 7315 (25.0)  | 1248 (11.4)   | 4576 (41.7)  | 5824 (26.6)  | 286 (7.8)   | 1205 (32.6) | 1491 (20.3) |
| Grade 3                                    | 341 (2.3)          | 2884 (19.6)  | 3225 (11.0)  | 255 (2.3)     | 2349 (21.4)  | 2604 (11.9)  | 86 (2.4)    | 535 (14.5)  | 621 (8.5)   |
| Grade 4                                    | 3 (<0.1)           | 14 (<0.1)    | 17 (<0.1)    | 2 (<0.1)      | 12 (0.1)     | 14 (<0.1)    | 1 (<0.1)    | 2 (<0.1)    | 3 (<0.1)    |
| Any Local AR                               | 2735 (18.8)        | 13006 (88.6) | 15741 (53.8) | 2244 (20.6)   | 9915 (90.3)  | 12159 (55.5) | 491 (13.5)  | 3091 (83.8) | 3582 (48.8) |
| Grade 1                                    | 2581 (17.7)        | 8778 (59.8)  | 11359 (38.9) | 2135 (19.6)   | 6410 (58.4)  | 8545 (39.0)  | 446 (12.2)  | 2368 (64.2) | 2814 (38.4) |
| Grade 2                                    | 82 (0.6)           | 3208 (21.9)  | 3290 (11.3)  | 67 (0.6)      | 2703 (24.6)  | 2770 (12.6)  | 15 (0.4)    | 505 (13.7)  | 520 (7.1)   |
| Grade 3                                    | 72 (0.5)           | 1020 (7.0)   | 1092 (3.7)   | 42 (0.4)      | 802 (7.3)    | 844 (3.9)    | 30 (0.8)    | 218 (5.9)   | 248 (3.4)   |
| Grade 4                                    | 0                  | 0            | 0            | 0             | 0            | 0            | 0           | 0           | 0           |
| Local AR                                   |                    |              |              |               |              |              |             |             |             |
| Pain                                       | 2477 (17.0)        | 12943 (88.2) | 15420 (52.7) | 2040 (18.7)   | 9873 (89.9)  | 11913 (54.4) | 437 (12.0)  | 3070 (83.2) | 3507 (47.8) |
| Grade 1                                    | 2378 (16.3)        | 9498 (64.7)  | 11876 (40.6) | 1972 (18.1)   | 6923 (63.0)  | 8895 (40.6)  | 406 (11.1)  | 2575 (69.8) | 2981 (40.6) |
| Grade 2                                    | 59 (0.4)           | 2841 (19.4)  | 2900 (9.9)   | 46 (0.4)      | 2444 (22.3)  | 2490 (11.4)  | 13 (0.4)    | 397 (10.8)  | 410 (5.6)   |
| Grade 3                                    | 40 (0.3)           | 604 (4.1)    | 644 (2.2)    | 22 (0.2)      | 506 (4.6)    | 528 (2.4)    | 18 (0.5)    | 98 (2.7)    | 116 (1.6)   |
| Erythema                                   | 56 (0.4)           | 1257 (8.6)   | 1313 (4.5)   | 43 (0.4)      | 982 (8.9)    | 1025 (4.7)   | 13 (0.4)    | 275 (7.5)   | 288 (3.9)   |
| Grade 1                                    | 38 (0.3)           | 442 (3.0)    | 480 (1.6)    | 28 (0.3)      | 352 (3.2)    | 380 (1.7)    | 10 (0.3)    | 90 (2.4)    | 100 (1.4)   |
| Grade 2                                    | 3 (<0.1)           | 528 (3.6)    | 531 (1.8)    | 3 (<0.1)      | 420 (3.8)    | 423 (1.9)    | 0           | 108 (2.9)   | 108 (1.5)   |
| Grade 3                                    | 15 (0.1)           | 287 (2.0)    | 302 (1.0)    | 12 (0.1)      | 210 (1.9)    | 222 (1.0)    | 3 (<0.1)    | 77 (2.1)    | 80 (1.1)    |
| Swelling                                   | 49 (0.3)           | 1789 (12.2)  | 1838 (6.3)   | 36 (0.3)      | 1389 (12.6)  | 1425 (6.5)   | 13 (0.4)    | 400 (10.8)  | 413 (5.6)   |
| Grade 1                                    | 29 (0.2)           | 890 (6.1)    | 919 (3.1)    | 24 (0.2)      | 700 (6.4)    | 724 (3.3)    | 5 (0.1)     | 190 (5.2)   | 195 (2.7)   |
| Grade 2                                    | 9 (<0.1)           | 645 (4.4)    | 654 (2.2)    | 8 (<0.1)      | 507 (4.6)    | 515 (2.4)    | 1 (<0.1)    | 138 (3.7)   | 139 (1.9)   |
| Grade 3                                    | 11 (<0.1)          | 254 (1.7)    | 265 (0.9)    | 4 (<0.1)      | 182 (1.7)    | 186 (0.8)    | 7 (0.2)     | 72 (2.0)    | 79 (1.1)    |
| Axillary swelling/tenderness*              | 567 (3.9)          | 2090 (14.2)  | 2657 (9.1)   | 470 (4.3)     | 1775 (16.2)  | 2245 (10.3)  | 97 (2.7)    | 315 (8.5)   | 412 (5.6)   |
| Grade 1                                    | 521 (3.6)          | 1737 (11.8)  | 2258 (7.7)   | 433 (4.0)     | 1469 (13.4)  | 1902 (8.7)   | 88 (2.4)    | 268 (7.3)   | 356 (4.9)   |
| Grade 2                                    | 27 (0.2)           | 286 (1.9)    | 313 (1.1)    | 26 (0.2)      | 260 (2.4)    | 286 (1.3)    | 1 (<0.1)    | 26 (0.7)    | 27 (0.4)    |
| Grade 3                                    | 19 (0.1)           | 67 (0.5)     | 86 (0.3)     | 11 (0.1)      | 46 (0.4)     | 57 (0.3)     | 8 (0.2)     | 21 (0.6)    | 29 (0.4)    |
| Any Systemic AR                            | 5323 (36.5)        | 11652 (79.4) | 16975 (58.1) | 4192 (38.4)   | 8999 (81.9)  | 13191 (60.2) | 1131 (31.0) | 2653 (71.9) | 3784 (51.6) |
| Grade 1                                    | 3526 (24.2)        | 3723 (25.4)  | 7249 (24.8)  | 2734 (25.0)   | 2618 (23.8)  | 5352 (24.4)  | 792 (21.7)  | 1105 (29.9) | 1897 (25.8) |
| Grade 2                                    | 1512 (10.4)        | 5590 (38.1)  | 7102 (24.3)  | 1233 (11.3)   | 4441 (40.4)  | 5674 (25.9)  | 279 (7.6)   | 1149 (31.1) | 1428 (19.5) |
| Grade 3                                    | 282 (1.9)          | 2325 (15.8)  | 2607 (8.9)   | 223 (2.0)     | 1928 (17.6)  | 2151 (9.8)   | 59 (1.6)    | 397 (10.8)  | 456 (6.2)   |
| Grade 4                                    | 3 (<0.1)           | 14 (<0.1)    | 17 (<0.1)    | 2 (<0.1)      | 12 (0.1)     | 14 (<0.1)    | 1 (<0.1)    | 2 (<0.1)    | 3 (<0.1)    |
| Systemic AR                                |                    |              |              |               |              |              |             |             |             |
| Fever                                      | 43 (0.3)           | 2278 (15.5)  | 2321 (7.9)   | 39 (0.4)      | 1908 (17.4)  | 1947 (8.9)   | 4 (0.1)     | 370 (10.0)  | 374 (5.1)   |
| Grade 1                                    | 33 (0.2)           | 1364 (9.3)   | 1397 (4.8)   | 31 (0.3)      | 1111 (10.1)  | 1142 (5.2)   | 2 (<0.1)    | 253 (6.9)   | 255 (3.5)   |
| Grade 2                                    | 5 (<0.1)           | 699 (4.8)    | 704 (2.4)    | 4 (<0.1)      | 601 (5.5)    | 605 (2.8)    | 1 (<0.1)    | 98 (2.7)    | 99 (1.3)    |
| Grade 3                                    | 2 (<0.1)           | 202 (1.4)    | 204 (0.7)    | 2 (<0.1)      | 184 (1.7)    | 186 (0.8)    | 0           | 18 (0.5)    | 18 (0.2)    |
| Grade 4                                    | 3 (<0.1)           | 13 (<0.1)    | 16 (<0.1)    | 2 (<0.1)      | 12 (0.1)     | 14 (<0.1)    | 1 (<0.1)    | 1 (<0.1)    | 2 (<0.1)    |
| Headache                                   | 3410 (23.4)        | 8602 (58.6)  | 12012 (41.1) | 2760 (25.3)   | 6898 (62.8)  | 9658 (44.1)  | 650 (17.8)  | 1704 (46.2) | 2354 (32.1) |

|                 |             |             |              |             |             |              |            |             |             |
|-----------------|-------------|-------------|--------------|-------------|-------------|--------------|------------|-------------|-------------|
| Grade 1         | 2739 (18.8) | 4804 (32.7) | 7543 (25.8)  | 2180 (20.0) | 3658 (33.3) | 5838 (26.7)  | 559 (15.3) | 1146 (31.1) | 1705 (23.2) |
| Grade 2         | 509 (3.5)   | 3139 (21.4) | 3648 (12.5)  | 451 (4.1)   | 2687 (24.5) | 3138 (14.3)  | 58 (1.6)   | 452 (12.3)  | 510 (7.0)   |
| Grade 3         | 162 (1.1)   | 659 (4.5)   | 821 (2.8)    | 129 (1.2)   | 553 (5.0)   | 682 (3.1)    | 33 (0.9)   | 106 (2.9)   | 139 (1.9)   |
| Fatigue         | 3403 (23.4) | 9582 (65.3) | 12985 (44.4) | 2687 (24.6) | 7430 (67.6) | 10117 (46.2) | 716 (19.6) | 2152 (58.3) | 2868 (39.1) |
| Grade 1         | 2182 (15.0) | 3432 (23.4) | 5614 (19.2)  | 1700 (15.6) | 2525 (23.0) | 4225 (19.3)  | 482 (13.2) | 907 (24.6)  | 1389 (18.9) |
| Grade 2         | 1115 (7.7)  | 4722 (32.2) | 5837 (20.0)  | 901 (8.3)   | 3731 (34.0) | 4632 (21.2)  | 214 (5.9)  | 991 (26.9)  | 1205 (16.4) |
| Grade 3         | 106 (0.7)   | 1428 (9.7)  | 1534 (5.2)   | 86 (0.8)    | 1174 (10.7) | 1260 (5.8)   | 20 (0.5)   | 254 (6.9)   | 274 (3.7)   |
| Myalgia         | 1809 (12.4) | 8508 (58.0) | 10317 (35.3) | 1411 (12.9) | 6769 (61.6) | 8180 (37.4)  | 398 (10.9) | 1739 (47.1) | 2137 (29.1) |
| Grade 1         | 1300 (8.9)  | 3239 (22.1) | 4539 (15.5)  | 994 (9.1)   | 2411 (22.0) | 3405 (15.6)  | 306 (8.4)  | 828 (22.4)  | 1134 (15.5) |
| Grade 2         | 457 (3.1)   | 3951 (26.9) | 4408 (15.1)  | 375 (3.4)   | 3245 (29.5) | 3620 (16.5)  | 82 (2.2)   | 706 (19.1)  | 788 (10.7)  |
| Grade 3         | 52 (0.4)    | 1318 (9.0)  | 1370 (4.7)   | 42 (0.4)    | 1113 (10.1) | 1155 (5.3)   | 10 (0.3)   | 205 (5.6)   | 215 (2.9)   |
| Arthralgia      | 1569 (10.8) | 6284 (42.8) | 7853 (26.9)  | 1172 (10.7) | 4993 (45.5) | 6165 (28.2)  | 397 (10.9) | 1291 (35.0) | 1688 (23.0) |
| Grade 1         | 1142 (7.8)  | 2802 (19.1) | 3944 (13.5)  | 837 (7.7)   | 2105 (19.2) | 2942 (13.4)  | 305 (8.4)  | 697 (18.9)  | 1002 (13.7) |
| Grade 2         | 383 (2.6)   | 2712 (18.5) | 3095 (10.6)  | 298 (2.7)   | 2241 (20.4) | 2539 (11.6)  | 85 (2.3)   | 471 (12.8)  | 556 (7.6)   |
| Grade 3         | 44 (0.3)    | 770 (5.2)   | 814 (2.8)    | 37 (0.3)    | 647 (5.9)   | 684 (3.1)    | 7 (0.2)    | 123 (3.3)   | 130 (1.8)   |
| Nausea/vomiting | 934 (6.4)   | 2785 (19.0) | 3719 (12.7)  | 801 (7.3)   | 2348 (21.4) | 3149 (14.4)  | 133 (3.6)  | 437 (11.8)  | 570 (7.8)   |
| Grade 1         | 756 (5.2)   | 2090 (14.2) | 2846 (9.7)   | 646 (5.9)   | 1752 (16.0) | 2398 (11.0)  | 110 (3.0)  | 338 (9.2)   | 448 (6.1)   |
| Grade 2         | 167 (1.1)   | 674 (4.6)   | 841 (2.9)    | 147 (1.3)   | 586 (5.3)   | 733 (3.3)    | 20 (0.5)   | 88 (2.4)    | 108 (1.5)   |
| Grade 3         | 11 (<0.1)   | 20 (0.1)    | 31 (0.1)     | 8 (<0.1)    | 10 (<0.1)   | 18 (<0.1)    | 3 (<0.1)   | 10 (0.3)    | 13 (0.2)    |
| Grade 4         | 0           | 1 (<0.1)    | 1 (<0.1)     | 0           | 0           | 0            | 0          | 1 (<0.1)    | 1 (<0.1)    |
| Chills          | 809 (5.6)   | 6482 (44.2) | 7291 (24.9)  | 658 (6.0)   | 5341 (48.6) | 5999 (27.4)  | 151 (4.1)  | 1141 (30.9) | 1292 (17.6) |
| Grade 1         | 626 (4.3)   | 2899 (19.8) | 3525 (12.1)  | 502 (4.6)   | 2307 (21.0) | 2809 (12.8)  | 124 (3.4)  | 592 (16.0)  | 716 (9.8)   |
| Grade 2         | 166 (1.1)   | 3392 (23.1) | 3558 (12.2)  | 141 (1.3)   | 2870 (26.1) | 3011 (13.8)  | 25 (0.7)   | 522 (14.2)  | 547 (7.5)   |
| Grade 3         | 17 (0.1)    | 191 (1.3)   | 208 (0.7)    | 15 (0.1)    | 164 (1.5)   | 179 (0.8)    | 2 (<0.1)   | 27 (0.7)    | 29 (0.4)    |

n=Number of exposed participants who submitted any for the event; percentages are based on the number of exposed participants who submitted any data for the event. Any = Grade 1 or higher. Toxicity grade for Erythema (Redness) is defined as: G1 = 25 — 50 mm; G2 = 51 — 100 mm; G3 = > 100 mm. Toxicity grade for Fever is defined as: G1 = 38 — 38.4 C; G2 = 38.5 — 38.9 C; G3 = 39 — 40 C; G4 = > 40 C. \*Localized axillary swelling or tenderness ipsilateral to the vaccination arm.

**Table S5. Number of Days Reporting Solicited Adverse Reactions After First and Second Vaccinations, Solicited Safety Set**

| Adverse reaction duration days    | Vaccination 1     |                     |                 | Vaccination 2     |                     |                 |
|-----------------------------------|-------------------|---------------------|-----------------|-------------------|---------------------|-----------------|
|                                   | Placebo (N=15155) | mRNA-1273 (N=15168) | Total (N=30323) | Placebo (N=14566) | mRNA-1273 (N=14677) | Total (N=29243) |
| Any solicited (n)                 | 7284              | 13319               | 20603           | 6232              | 13534               | 19766           |
| Mean days (SD)                    | 3.2 (4.2)         | 3.4 (3.3)           | 3.3 (3.6)       | 3.4 (5.7)         | 4.0 (4.8)           | 3.8 (5.1)       |
| Any local (n)                     | 2997              | 12765               | 15762           | 2735              | 13006               | 15741           |
| Mean days (SD)                    | 1.9 (2.6)         | 2.6 (2.0)           | 2.5 (2.0)       | 2.1 (4.1)         | 3.2 (2.9)           | 3.0 (3.2)       |
| Pain (n)                          | 2658              | 12690               | 15348           | 2477              | 12943               | 15420           |
| Mean, days (SD)                   | 1.7 (2.1)         | 2.4 (1.4)           | 2.3 (1.5)       | 1.8 (3.3)         | 3.0 (2.2)           | 2.8 (2.4)       |
| Erythema (n)                      | 67                | 430                 | 497             | 56                | 1257                | 1313            |
| Mean, days (SD)                   | 3.2 (5.6)         | 2.5 (4.1)           | 2.6 (4.4)       | 3.8 (10.6)        | 2.7 (3.9)           | 2.7 (4.4)       |
| Swelling (n)                      | 52                | 932                 | 984             | 49                | 1789                | 1838            |
| Mean, days (SD)                   | 5.1 (7.8)         | 2.1 (2.2)           | 2.2 (2.8)       | 2.7 (4.9)         | 2.6 (4.1)           | 2.6 (4.2)       |
| Axillary swelling/tenderness* (n) | 722               | 1553                | 2275            | 567               | 2090                | 2657            |
| Mean, days (SD)                   | 2.1 (2.8)         | 2.3 (2.9)           | 2.2 (2.9)       | 2.6 (5.3)         | 2.4 (3.2)           | 2.4 (3.7)       |
| Any Systemic AR                   | 6399              | 8320                | 14719           | 5323              | 11652               | 16975           |
| Mean, days (SD)                   | 3.1 (4.2)         | 2.9 (3.7)           | 3.0 (3.9)       | 3.4 (5.6)         | 3.1 (4.6)           | 3.2 (4.9)       |
| Fever (n)                         | 44                | 115                 | 159             | 43                | 2278                | 2321            |
| Mean, days (SD)                   | 1.4 (0.6)         | 1.3 (0.7)           | 1.3 (0.7)       | 1.2 (0.5)         | 1.2 (1.7)           | 1.2 (1.7)       |
| Headache (n)                      | 4027              | 4951                | 8978            | 3410              | 8602                | 12012           |
| Mean, days (SD)                   | 2.1 (2.4)         | 2.1 (2.2)           | 2.1 (2.3)       | 2.3 (3.3)         | 2.3 (2.9)           | 2.3 (3.0)       |
| Fatigue (n)                       | 4133              | 5635                | 9768            | 3403              | 9582                | 12985           |
| Mean, days (SD)                   | 2.8 (3.7)         | 2.7 (3.6)           | 2.7 (3.6)       | 3.0 (5.1)         | 2.6 (3.7)           | 2.7 (4.1)       |
| Myalgia (n)                       | 2071              | 3441                | 5512            | 1809              | 8508                | 10317           |
| Mean, days (SD)                   | 2.7 (3.7)         | 2.3 (3.2)           | 2.4 (3.4)       | 3.2 (6.1)         | 2.1 (3.1)           | 2.3 (3.8)       |
| Arthralgia (n)                    | 1783              | 2511                | 4294            | 1569              | 6284                | 7853            |
| Mean, days (SD)                   | 3.2 (5.0)         | 2.6 (4.1)           | 2.9 (4.5)       | 3.7 (7.0)         | 2.3 (3.5)           | 2.5 (4.5)       |
| Nausea/vomiting (n)               | 1074              | 1262                | 2336            | 934               | 2785                | 3719            |
| Mean, days (SD)                   | 1.8 (2.2)         | 1.7 (1.5)           | 1.7 (1.9)       | 1.9 (3.8)         | 1.7 (2.4)           | 1.8 (2.8)       |
| Chills (n)                        | 878               | 1253                | 2131            | 809               | 6482                | 7291            |
| Mean, days (SD)                   | 1.7 (1.7)         | 1.5 (1.7)           | 1.6 (1.7)       | 1.9 (3.2)         | 1.5 (1.6)           | 1.5 (1.8)       |

n = Number of exposed participants who reported the event on any day within 7 days of the first injection. Number of days is calculated as the days of the solicited adverse reaction reported within the 7 days of injection including the day of injection. If the solicited AR continued beyond 7 days, the consecutive days a solicited adverse reaction was reported after 7 days are included. \*Localized axillary swelling or tenderness ipsilateral to the vaccination arm.

**Table S6. Solicited Adverse reactions by SARS-CoV-2 Baseline Status by Grade After Vaccination 1, Solicited Safety Set**

| Vaccination-1 ARs n (%)       | Baseline SARS-CoV-2 negative |              |              | Baseline SARS-CoV-2 positive |            |            | Missing data |            |            |
|-------------------------------|------------------------------|--------------|--------------|------------------------------|------------|------------|--------------|------------|------------|
|                               | Placebo                      | mRNA-1273    | Total        | Placebo                      | mRNA-1273  | Total      | Placebo      | mRNA-1273  | Total      |
|                               | (N=14583)                    | (N=14538)    | (N=29121)    | (N=337)                      | (N=342)    | (N=679)    | (N=235)      | (N=288)    | N=523      |
| Any solicited AR              | 7023 (48.2)                  | 12800 (88.0) | 19823 (68.1) | 137 (40.7)                   | 261 (76.3) | 398 (58.6) | 124 (52.8)   | 258 (89.6) | 382 (73.0) |
| Grade 1                       | 4978 (34.1)                  | 9029 (62.1)  | 14007 (48.1) | 82 (24.3)                    | 136 (39.8) | 218 (32.1) | 87 (37.0)    | 177 (61.5) | 264 (50.5) |
| Grade 2                       | 1696 (11.6)                  | 2972 (20.4)  | 4668 (16.0)  | 41 (12.2)                    | 96 (28.1)  | 137 (20.2) | 33 (14.0)    | 56 (19.4)  | 89 (17.0)  |
| Grade 3                       | 344 (2.4)                    | 795 (5.5)    | 1139 (3.9)   | 13 (3.9)                     | 28 (8.2)   | 41 (6.0)   | 4 (1.7)      | 25 (8.7)   | 29 (5.5)   |
| Grade 4                       | 5 (<0.1)                     | 4 (<0.1)     | 9 (<0.1)     | 1 (0.3)                      | 1 (0.3)    | 2 (0.3)    | 0            | 0          | 0          |
| Any Local AR                  | 2891 (19.8)                  | 12276 (84.5) | 15167 (52.1) | 60 (17.8)                    | 246 (71.9) | 306 (45.1) | 46 (19.6)    | 243 (84.4) | 289 (55.3) |
| Grade 1                       | 2738 (18.8)                  | 10352 (71.2) | 13090 (45.0) | 56 (16.6)                    | 178 (52.0) | 234 (34.5) | 43 (18.3)    | 201 (69.8) | 244 (46.7) |
| Grade 2                       | 80 (0.5)                     | 1423 (9.8)   | 1503 (5.2)   | 1 (0.3)                      | 55 (16.1)  | 56 (8.2)   | 1 (0.4)      | 27 (9.4)   | 28 (5.4)   |
| Grade 3                       | 73 (0.5)                     | 501 (3.4)    | 574 (2.0)    | 3 (0.9)                      | 13 (3.8)   | 16 (2.4)   | 2 (0.9)      | 15 (5.2)   | 17 (3.3)   |
| Grade 4                       | 0                            | 0            | 0            | 0                            | 0          | 0          | 0            | 0          | 0          |
| Local AR                      |                              |              |              |                              |            |            |              |            |            |
| Pain                          | 2563 (17.6)                  | 12207 (84.0) | 14770 (50.7) | 56 (16.6)                    | 244 (71.3) | 300 (44.2) | 39 (16.6)    | 239 (83.0) | 278 (53.2) |
| Grade 1                       | 2459 (16.9)                  | 10601 (72.9) | 13060 (44.9) | 54 (16.0)                    | 183 (53.5) | 237 (34.9) | 36 (15.3)    | 206 (71.5) | 242 (46.3) |
| Grade 2                       | 52 (0.4)                     | 1211 (8.3)   | 1263 (4.3)   | 1 (0.3)                      | 51 (14.9)  | 52 (7.7)   | 1 (0.4)      | 22 (7.6)   | 23 (4.4)   |
| Grade 3                       | 52 (0.4)                     | 395 (2.7)    | 447 (1.5)    | 1 (0.3)                      | 10 (2.9)   | 11 (1.6)   | 2 (0.9)      | 11 (3.8)   | 13 (2.5)   |
| Erythema                      | 63 (0.4)                     | 409 (2.8)    | 472 (1.6)    | 3 (0.9)                      | 9 (2.6)    | 12 (1.8)   | 1 (0.4)      | 12 (4.2)   | 13 (2.5)   |
| Grade 1                       | 45 (0.3)                     | 254 (1.7)    | 299 (1.0)    | 1 (0.3)                      | 5 (1.5)    | 6 (0.9)    | 1 (0.4)      | 8 (2.8)    | 9 (1.7)    |
| Grade 2                       | 7 (<0.1)                     | 115 (0.8)    | 122 (0.4)    | 0                            | 2 (0.6)    | 2 (0.3)    | 0            | 4 (1.4)    | 4 (0.8)    |
| Grade 3                       | 11 (<0.1)                    | 40(0.3)      | 51(0.2)      | 2 (0.6)                      | 2 (0.6)    | 4 (0.6)    | 0            | 0          | 0          |
| Swelling                      | 49 (0.3)                     | 895 (6.2)    | 944 (3.2)    | 2 (0.6)                      | 19 (5.6)   | 21 (3.1)   | 1 (0.4)      | 18 (6.3)   | 19 (3.6)   |
| Grade 1                       | 36 (0.2)                     | 582 (4.0)    | 618 (2.1)    | 2 (0.6)                      | 10 (2.9)   | 12 (1.8)   | 1 (0.4)      | 13 (4.5)   | 14 (2.7)   |
| Grade 2                       | 7 (<0.1)                     | 235 (1.6)    | 242 (0.8)    | 0                            | 8 (2.3)    | 8 (1.2)    | 0            | 2 (0.7)    | 2 (0.4)    |
| Grade 3                       | 6 (<0.1)                     | 78 (0.5)     | 84 (0.3)     | 0                            | 1 (0.3)    | 1 (0.1)    | 0            | 3 (1.0)    | 3 (0.6)    |
| Axillary swelling/tenderness* | 689 (4.7)                    | 1465 (10.1)  | 2154 (7.4)   | 18 (5.3)                     | 53 (15.5)  | 71 (10.5)  | 15 (6.4)     | 35 (12.2)  | 50 (9.6)   |
| Grade 1                       | 637 (4.4)                    | 1327 (9.1)   | 1964 (6.7)   | 17 (5.0)                     | 38 (11.1)  | 55 (8.1)   | 14 (6.0)     | 30 (10.4)  | 44 (8.4)   |
| Grade 2                       | 27 (0.2)                     | 94 (0.6)     | 121 (0.4)    | 0                            | 11 (3.2)   | 11 (1.6)   | 0            | 4 (1.4)    | 4 (0.8)    |
| Grade 3                       | 25 (0.2)                     | 44 (0.3)     | 69 (0.2)     | 1 (0.3)                      | 4 (1.2)    | 5 (0.7)    | 1 (0.4)      | 1 (0.3)    | 2 (0.4)    |
| Any Systemic AR               | 6167 (42.3)                  | 7954 (54.7)  | 14121 (48.5) | 121 (35.9)                   | 210 (61.4) | 331 (48.7) | 111 (47.2)   | 156 (54.2) | 267 (51.1) |
| Grade 1                       | 4203 (28.8)                  | 5171 (35.6)  | 9374 (32.2)  | 69 (20.5)                    | 107 (31.3) | 176 (25.9) | 74 (31.5)    | 94 (32.6)  | 168 (32.1) |
| Grade 2                       | 1665 (11.4)                  | 2367 (16.3)  | 4032 (13.8)  | 40 (11.9)                    | 80 (23.4)  | 120 (17.7) | 34 (14.5)    | 49 (17.0)  | 83 (15.9)  |
| Grade 3                       | 294 (2.0)                    | 412 (2.8)    | 706 (2.4)    | 11 (3.3)                     | 22 (6.4)   | 33 (4.9)   | 3 (1.3)      | 13 (4.5)   | 16 (3.1)   |
| Grade 4                       | 5 (<0.1)                     | 4 (<0.1)     | 9 (<0.1)     | 1 (0.3)                      | 1 (0.3)    | 2 (0.3)    | 0            | 0          | 0          |
| Systemic AR                   |                              |              |              |                              |            |            |              |            |            |
| Fever                         | 38 (0.3)                     | 79 (0.5)     | 117 (0.4)    | 6 (1.8)                      | 32 (9.4)   | 38 (5.6)   | 0            | 4 (1.4)    | 4 (0.8)    |
| Grade 1                       | 26 (0.2)                     | 51 (0.4)     | 77 (0.3)     | 3 (0.9)                      | 20 (5.8)   | 23 (3.4)   | 0            | 3 (1.0)    | 3 (0.6)    |
| Grade 2                       | 5 (<0.1)                     | 16 (0.1)     | 21 (<0.1)    | 2 (0.6)                      | 9 (2.6)    | 11 (1.6)   | 0            | 1 (0.3)    | 1 (0.2)    |
| Grade 3                       | 2 (<0.1)                     | 9 (<0.1)     | 11 (<0.1)    | 0                            | 2 (0.6)    | 2 (0.3)    | 0            | 0          | 0          |
| Grade 4                       | 5 (<0.1)                     | 3 (<0.1)     | 8 (<0.1)     | 1 (0.3)                      | 1 (0.3)    | 2 (0.3)    | 0            | 0          | 0          |
| Headache                      | 3865 (26.5)                  | 4723 (32.5)  | 8588 (29.5)  | 82 (24.3)                    | 131 (38.3) | 213 (31.4) | 80 (34.0)    | 97 (33.7)  | 177 (33.8) |
| Grade 1                       | 3182 (21.8)                  | 3795 (26.1)  | 6977 (24.0)  | 59 (17.5)                    | 88 (25.7)  | 147 (21.6) | 65 (27.7)    | 70 (24.3)  | 135 (25.8) |
| Grade 2                       | 496 (3.4)                    | 679 (4.7)    | 1175 (4.0)   | 16 (4.7)                     | 31 (9.1)   | 47 (6.9)   | 13 (5.5)     | 17 (5.9)   | 30 (5.7)   |
| Grade 3                       | 187 (1.3)                    | 249 (1.7)    | 436 (1.5)    | 7 (2.1)                      | 12 (3.5)   | 19 (2.8)   | 2 (0.9)      | 10 (3.5)   | 12 (2.3)   |

|                 |             |             |             |           |            |            |           |            |            |
|-----------------|-------------|-------------|-------------|-----------|------------|------------|-----------|------------|------------|
| Fatigue         | 3988 (27.4) | 5400 (37.2) | 9388 (32.2) | 72 (21.4) | 134 (39.2) | 206 (30.3) | 73 (31.1) | 101 (35.1) | 174 (33.3) |
| Grade 1         | 2618 (18.0) | 3468 (23.9) | 6086 (20.9) | 40 (11.9) | 69 (20.2)  | 109 (16.1) | 51 (21.7) | 62 (21.5)  | 113 (21.6) |
| Grade 2         | 1271 (8.7)  | 1793 (12.3) | 3064 (10.5) | 28 (8.3)  | 56 (16.4)  | 84 (12.4)  | 20 (8.5)  | 36 (12.5)  | 56 (10.7)  |
| Grade 3         | 99 (0.7)    | 138 (0.9)   | 237 (0.8)   | 4 (1.2)   | 9 (2.6)    | 13 (1.9)   | 2 (0.9)   | 3 (1.0)    | 5 (1.0)    |
| Grade 4         | 0           | 1 (<0.1)    | 1 (<0.1)    | 0         | 0          | 0          | 0         | 0          | 0          |
| Myalgia         | 1987 (13.6) | 3244 (22.3) | 5231 (18.0) | 47 (13.9) | 124 (36.3) | 171 (25.2) | 37 (15.7) | 73 (25.3)  | 110 (21.0) |
| Grade 1         | 1510 (10.4) | 2318 (15.9) | 3828 (13.1) | 27 (8.0)  | 70 (20.5)  | 97 (14.3)  | 30 (12.8) | 57 (19.8)  | 87 (16.6)  |
| Grade 2         | 433 (3.0)   | 845 (5.8)   | 1278 (4.4)  | 18 (5.3)  | 48 (14.0)  | 66 (9.7)   | 6 (2.6)   | 13 (4.5)   | 19 (3.6)   |
| Grade 3         | 44 (0.3)    | 81 (0.6)    | 125 (0.4)   | 2 (0.6)   | 6 (1.8)    | 8 (1.2)    | 1 (0.4)   | 3 (1.0)    | 4 (0.8)    |
| Arthralgia      | 1707 (11.7) | 2381 (16.4) | 4088 (14.0) | 40 (11.9) | 85 (24.9)  | 125 (18.4) | 36 (15.3) | 45 (15.6)  | 81 (15.5)  |
| Grade 1         | 1294 (8.9)  | 1761 (12.1) | 3055 (10.5) | 21 (6.2)  | 53 (15.5)  | 74 (10.9)  | 26 (11.1) | 32 (11.1)  | 58 (11.1)  |
| Grade 2         | 379 (2.6)   | 565 (3.9)   | 944 (3.2)   | 17 (5.0)  | 27 (7.9)   | 44 (6.5)   | 9 (3.8)   | 12 (4.2)   | 21 (4.0)   |
| Grade 3         | 34 (0.2)    | 54 (0.4)    | 88 (0.3)    | 2 (0.6)   | 5 (1.5)    | 7 (1.0)    | 1 (0.4)   | 1 (0.3)    | 2 (0.4)    |
| Grade 4         | 0           | 1 (<0.1)    | 1 (<0.1)    | 0         | 0          | 0          | 0         | 0          | 0          |
| Nausea/vomiting | 1033 (7.1)  | 1193 (8.2)  | 2226 (7.6)  | 26 (7.7)  | 42 (12.3)  | 68 (10.0)  | 15 (6.4)  | 27 (9.4)   | 42 (8.0)   |
| Grade 1         | 860 (5.9)   | 998 (6.9)   | 1858 (6.4)  | 18 (5.3)  | 30 (8.8)   | 48 (7.1)   | 12 (5.1)  | 20 (6.9)   | 32 (6.1)   |
| Grade 2         | 161 (1.1)   | 186 (1.3)   | 347 (1.2)   | 8 (2.4)   | 12 (3.5)   | 20 (2.9)   | 3 (1.3)   | 6 (2.1)    | 9 (1.7)    |
| Grade 3         | 12 (<0.1)   | 9 (<0.1)    | 21 (<0.1)   | 0         | 0          | 0          | 0         | 1 (0.3)    | 1 (0.2)    |
| Chills          | 836 (5.7)   | 1144 (7.9)  | 1980 (6.8)  | 27 (8.0)  | 80 (23.4)  | 107 (15.8) | 15 (6.4)  | 29 (10.1)  | 44 (8.4)   |
| Grade 1         | 675 (4.6)   | 878 (6.0)   | 1553 (5.3)  | 17 (5.0)  | 43 (12.6)  | 60 (8.8)   | 14 (6.0)  | 19 (6.6)   | 33 (6.3)   |
| Grade 2         | 148 (1.0)   | 246 (1.7)   | 394 (1.4)   | 9 (2.7)   | 34 (9.9)   | 43 (6.3)   | 1 (0.4)   | 9 (3.1)    | 10 (1.9)   |
| Grade 3         | 13 (<0.1)   | 20 (0.1)    | 33 (0.1)    | 1 (0.3)   | 3 (0.9)    | 4 (0.6)    | 0         | 1 (0.3)    | 1 (0.2)    |

CI = Confidence intervals. N1 = Number of exposed participants who submitted any data for the event. Any = Grade 1 or higher. Percentages are based on the number of exposed participants who submitted any data for the event. 95% CI is calculated using the Clopper-Pearson method. Toxicity grade for Erythema (Redness) is defined as: G1 = 25 — 50 mm; G2 = 51 — 100 mm; G3 = > 100 mm. Toxicity grade for Fever is defined as: G1 = 38 — 38.4 C; G2 = 38.5 — 38.9 C; G3 = 39 — 40 C; G4 = > 40 C.

\*Localized axillary swelling or tenderness ipsilateral to the vaccination arm.



**Table S7. Solicited Adverse reactions by SARS-CoV-2 Baseline Status by Grade After Vaccination 2, Solicited Safety Set**

| Vaccination-2 ARs n (%)       | Baseline SARS-CoV-2 negative |                        |                    | Baseline SARS-CoV-2 positive |                      |                  | Missing data       |                      |                  |
|-------------------------------|------------------------------|------------------------|--------------------|------------------------------|----------------------|------------------|--------------------|----------------------|------------------|
|                               | Placebo<br>(N=14119)         | mRNA-1273<br>(N=14183) | Total<br>(N=28302) | Placebo<br>(N=232)           | mRNA-1273<br>(N=230) | Total<br>(N=462) | Placebo<br>(N=215) | mRNA-1273<br>(N=264) | Total<br>(N=479) |
| Any solicited AR              | 6056 (42.9)                  | 13101 (92.4)           | 19157 (67.7)       | 81 (34.9)                    | 186 (80.9)           | 267 (57.8)       | 95 (44.2)          | 247 (93.6)           | 342 (71.4)       |
| Grade 1                       | 4235 (30.0)                  | 4676 (33.0)            | 8911 (31.5)        | 51 (22.0)                    | 91 (39.6)            | 142 (30.7)       | 68 (31.6)          | 88 (33.3)            | 156 (32.6)       |
| Grade 2                       | 1485 (10.5)                  | 5609 (39.5)            | 7094 (25.1)        | 27 (11.6)                    | 66 (28.7)            | 93 (20.1)        | 22 (10.2)          | 106 (40.2)           | 128 (26.7)       |
| Grade 3                       | 333 (2.4)                    | 2802 (19.8)            | 3135 (11.1)        | 3 (1.3)                      | 29 (12.6)            | 32 (6.9)         | 5 (2.3)            | 53 (20.1)            | 58 (12.1)        |
| Grade 4                       | 3 (<0.1)                     | 14 (<0.1)              | 17 (<0.1)          | 0                            | 0                    | 0                | 0                  | 0                    | 0                |
| Any Local AR                  | 2650 (18.8)                  | 12594 (88.8)           | 15244 (53.9)       | 42 (18.2)                    | 172 (74.8)           | 214 (46.4)       | 43 (20.0)          | 240 (90.9)           | 283 (59.1)       |
| Grade 1                       | 2505 (17.7)                  | 8489 (59.9)            | 10994 (38.9)       | 35 (15.2)                    | 125 (54.3)           | 160 (34.7)       | 41 (19.1)          | 164 (62.1)           | 205 (42.8)       |
| Grade 2                       | 77 (0.5)                     | 3122 (22.0)            | 3199 (11.3)        | 5 (2.2)                      | 35 (15.2)            | 40 (8.7)         | 0                  | 51 (19.3)            | 51 (10.6)        |
| Grade 3                       | 68 (0.5)                     | 983 (6.9)              | 1051 (3.7)         | 2 (0.9)                      | 12 (5.2)             | 14 (3.0)         | 2 (0.9)            | 25 (9.5)             | 27 (5.6)         |
| Grade 4                       | 0                            | 0                      | 0                  | 0                            | 0                    | 0                | 0                  | 0                    | 0                |
| Local AR                      |                              |                        |                    |                              |                      |                  |                    |                      |                  |
| Pain                          | 2403 (17.0)                  | 12536 (88.4)           | 14939 (52.8)       | 36 (15.6)                    | 169 (73.5)           | 205 (44.5)       | 38 (17.7)          | 238 (90.2)           | 276 (57.6)       |
| Grade 1                       | 2310 (16.4)                  | 9194 (64.8)            | 11504 (40.7)       | 32 (13.9)                    | 125 (54.3)           | 157 (34.1)       | 36 (16.7)          | 179 (67.8)           | 215 (44.9)       |
| Grade 2                       | 56 (0.4)                     | 2758 (19.5)            | 2814 (9.9)         | 3 (1.3)                      | 36 (15.7)            | 39 (8.5)         | 0                  | 47 (17.8)            | 47 (9.8)         |
| Grade 3                       | 37 (0.3)                     | 584 (4.1)              | 621 (2.2)          | 1 (0.4)                      | 8 (3.5)              | 9 (2.0)          | 2 (0.9)            | 12 (4.5)             | 14 (2.9)         |
| Erythema                      | 52 (0.4)                     | 1227 (8.7)             | 1279 (4.5)         | 1 (0.4)                      | 8 (3.5)              | 9 (2.0)          | 3 (1.4)            | 22 (8.3)             | 25 (5.2)         |
| Grade 1                       | 35 (0.2)                     | 434 (3.1)              | 469 (1.7)          | 0                            | 2 (0.9)              | 2 (0.4)          | 3 (1.4)            | 6 (2.3)              | 9 (1.9)          |
| Grade 2                       | 3 (<0.1)                     | 521 (3.7)              | 524 (1.9)          | 0                            | 3 (1.3)              | 3 (0.7)          | 0                  | 4 (1.5)              | 4 (0.8)          |
| Grade 3                       | 14 (<0.1)                    | 272 (1.9)              | 286 (1.0)          | 1 (0.4)                      | 3 (1.3)              | 4 (0.9)          | 0                  | 12 (4.5)             | 12 (2.5)         |
| Swelling                      | 47 (0.3)                     | 1746 (12.3)            | 1793 (6.3)         | 1 (0.4)                      | 11 (4.8)             | 12 (2.6)         | 1 (0.5)            | 32 (12.1)            | 33 (6.9)         |
| Grade 1                       | 28 (0.2)                     | 874 (6.2)              | 902 (3.2)          | 0                            | 4 (1.7)              | 4 (0.9)          | 1 (0.5)            | 12 (4.5)             | 13 (2.7)         |
| Grade 2                       | 8 (<0.1)                     | 629 (4.4)              | 637 (2.3)          | 1 (0.4)                      | 5 (2.2)              | 6 (1.3)          | 0                  | 11 (4.2)             | 11 (2.3)         |
| Grade 3                       | 11 (<0.1)                    | 243 (1.7)              | 254 (0.9)          | 0                            | 2 (0.9)              | 2 (0.4)          | 0                  | 9 (3.4)              | 9 (1.9)          |
| Axillary swelling/tenderness* | 546 (3.9)                    | 2018 (14.2)            | 2564 (9.1)         | 11 (4.8)                     | 30 (13.0)            | 41 (8.9)         | 10 (4.7)           | 42 (15.9)            | 52 (10.9)        |
| Grade 1                       | 503 (3.6)                    | 1682 (11.9)            | 2185 (7.7)         | 8 (3.5)                      | 20 (8.7)             | 28 (6.1)         | 10 (4.7)           | 35 (13.3)            | 45 (9.4)         |
| Grade 2                       | 24 (0.2)                     | 271 (1.9)              | 295 (1.0)          | 3 (1.3)                      | 8 (3.5)              | 11 (2.4)         | 0                  | 7 (2.7)              | 7 (1.5)          |
| Grade 3                       | 19 (0.1)                     | 65 (0.5)               | 84 (0.3)           | 0                            | 2 (0.9)              | 2 (0.4)          | 0                  | 0                    | 0                |
| Any Systemic AR               | 5168 (36.6)                  | 11290 (79.6)           | 16458 (58.2)       | 71 (30.6)                    | 150 (65.2)           | 221 (47.8)       | 84 (39.1)          | 212 (80.3)           | 296 (61.8)       |
| Grade 1                       | 3427 (24.3)                  | 3593 (25.3)            | 7020 (24.8)        | 42 (18.1)                    | 61 (26.5)            | 103 (22.3)       | 57 (26.5)          | 69 (26.1)            | 126 (26.3)       |
| Grade 2                       | 1462 (10.4)                  | 5414 (38.2)            | 6876 (24.3)        | 28 (12.1)                    | 68 (29.6)            | 96 (20.8)        | 22 (10.2)          | 108 (40.9)           | 130 (27.1)       |
| Grade 3                       | 276 (2.0)                    | 2269 (16.0)            | 2545 (9.0)         | 1 (0.4)                      | 21 (9.1)             | 22 (4.8)         | 5 (2.3)            | 35 (13.3)            | 40 (8.4)         |
| Grade 4                       | 3 (<0.1)                     | 14 (<0.1)              | 17 (<0.1)          | 0                            | 0                    | 0                | 0                  | 0                    | 0                |
| Systemic AR                   |                              |                        |                    |                              |                      |                  |                    |                      |                  |
| Fever                         | 42 (0.3)                     | 2223 (15.7)            | 2265 (8.0)         | 1 (0.4)                      | 31 (13.5)            | 32 (6.9)         | 0                  | 24 (9.1)             | 24 (5.0)         |
| Grade 1                       | 32 (0.2)                     | 1326 (9.4)             | 1358 (4.8)         | 1 (0.4)                      | 20 (8.7)             | 21 (4.6)         | 0                  | 18 (6.8)             | 18 (3.8)         |
| Grade 2                       | 5 (<0.1)                     | 685 (4.8)              | 690 (2.4)          | 0                            | 9 (3.9)              | 9 (2.0)          | 0                  | 5 (1.9)              | 5 (1.0)          |
| Grade 3                       | 2 (<0.1)                     | 199 (1.4)              | 201 (0.7)          | 0                            | 2 (0.9)              | 2 (0.4)          | 0                  | 1 (0.4)              | 1 (0.2)          |
| Grade 4                       | 3 (<0.1)                     | 13 (<0.1)              | 16 (<0.1)          | 0                            | 0                    | 0                | 0                  | 0                    | 0                |
| Headache                      | 3311 (23.5)                  | 8348 (58.9)            | 11659 (41.2)       | 43 (18.6)                    | 97 (42.2)            | 140 (30.4)       | 56 (26.0)          | 157 (59.5)           | 213 (44.5)       |
| Grade 1                       | 2655 (18.8)                  | 4648 (32.8)            | 7303 (25.8)        | 36 (15.6)                    | 60 (26.1)            | 96 (20.8)        | 48 (22.3)          | 96 (36.4)            | 144 (30.1)       |
| Grade 2                       | 497 (3.5)                    | 3058 (21.6)            | 3555 (12.6)        | 7 (3.0)                      | 31 (13.5)            | 38 (8.2)         | 5 (2.3)            | 50 (18.9)            | 55 (11.5)        |
| Grade 3                       | 159 (1.1)                    | 642 (4.5)              | 801 (2.8)          | 0                            | 6 (2.6)              | 6 (1.3)          | 3 (1.4)            | 11 (4.2)             | 14 (2.9)         |

|                 |             |             |              |           |            |            |           |            |            |
|-----------------|-------------|-------------|--------------|-----------|------------|------------|-----------|------------|------------|
| Fatigue         | 3294 (23.3) | 9310 (65.7) | 12604 (44.5) | 53 (22.9) | 104 (45.2) | 157 (34.1) | 56 (26.0) | 168 (63.6) | 224 (46.8) |
| Grade 1         | 2115 (15.0) | 3332 (23.5) | 5447 (19.3)  | 30 (13.0) | 42 (18.3)  | 72 (15.6)  | 37 (17.2) | 58 (22.0)  | 95 (19.8)  |
| Grade 2         | 1077 (7.6)  | 4583 (32.3) | 5660 (20.0)  | 22 (9.5)  | 50 (21.7)  | 72 (15.6)  | 16 (7.4)  | 89 (33.7)  | 105 (21.9) |
| Grade 3         | 102 (0.7)   | 1395 (9.8)  | 1497 (5.3)   | 1 (0.4)   | 12 (5.2)   | 13 (2.8)   | 3 (1.4)   | 21 (8.0)   | 24 (5.0)   |
| Grade 4         | 0           | 0           | 0            | 0         | 0          | 0          | 0         | 0          | 0          |
| Myalgia         | 1738 (12.3) | 8229 (58.0) | 9967 (35.2)  | 32 (13.9) | 115 (50.0) | 147 (31.9) | 39 (18.1) | 164 (62.1) | 203 (42.4) |
| Grade 1         | 1252 (8.9)  | 3117 (22.0) | 4369 (15.4)  | 20 (8.7)  | 59 (25.7)  | 79 (17.1)  | 28 (13.0) | 63 (23.9)  | 91 (19.0)  |
| Grade 2         | 436 (3.1)   | 3828 (27.0) | 4264 (15.1)  | 12 (5.2)  | 45 (19.6)  | 57 (12.4)  | 9 (4.2)   | 78 (29.5)  | 87 (18.2)  |
| Grade 3         | 50 (0.4)    | 1284 (9.1)  | 1334 (4.7)   | 0         | 11 (4.8)   | 11 (2.4)   | 2 (0.9)   | 23 (8.7)   | 25 (5.2)   |
| Arthralgia      | 1516 (10.7) | 6083 (42.9) | 7599 (26.9)  | 24 (10.4) | 76 (33.0)  | 100 (21.7) | 29 (13.5) | 125 (47.3) | 154 (32.2) |
| Grade 1         | 1102 (7.8)  | 2717 (19.2) | 3819 (13.5)  | 17 (7.4)  | 37 (16.1)  | 54 (11.7)  | 23 (10.7) | 48 (18.2)  | 71 (14.8)  |
| Grade 2         | 371 (2.6)   | 2613 (18.4) | 2984 (10.5)  | 7 (3.0)   | 35 (15.2)  | 42 (9.1)   | 5 (2.3)   | 64 (24.2)  | 69 (14.4)  |
| Grade 3         | 43 (0.3)    | 753 (5.3)   | 796 (2.8)    | 0         | 4 (1.7)    | 4 (0.9)    | 1 (0.5)   | 13 (4.9)   | 14 (2.9)   |
| Grade 4         | 0           | 0           | 0            | 0         | 0          | 0          | 0         | 0          | 0          |
| Nausea/vomiting | 912 (6.5)   | 2700 (19.0) | 3612 (12.8)  | 13 (5.6)  | 34 (14.8)  | 47 (10.2)  | 9 (4.2)   | 51 (19.3)  | 60 (12.5)  |
| Grade 1         | 740 (5.2)   | 2022 (14.3) | 2762 (9.8)   | 10 (4.3)  | 26 (11.3)  | 36 (7.8)   | 6 (2.8)   | 42 (15.9)  | 48 (10.0)  |
| Grade 2         | 161 (1.1)   | 658 (4.6)   | 819 (2.9)    | 3 (1.3)   | 7 (3.0)    | 10 (2.2)   | 3 (1.4)   | 9 (3.4)    | 12 (2.5)   |
| Grade 3         | 11 (<0.1)   | 19 (0.1)    | (0.1)        | 0         | 1 (0.4)    | 1 (0.2)    | 0         | 0          | 0          |
| Grade 4         | 0           | 1 (<0.1)    | 1 (<0.1)     | 0         | 0          | 0          | 0         | 0          | 0          |
| Chills          | 778 (5.5)   | 6292 (44.4) | 7070 (25.0)  | 17 (7.4)  | 78 (33.9)  | 95 (20.6)  | 14 (6.5)  | 112 (42.4) | 126 (26.3) |
| Grade 1         | 604 (4.3)   | 2807 (19.8) | 3411 (12.1)  | 14 (6.1)  | 39 (17.0)  | 53 (11.5)  | 8 (3.7)   | 53 (20.1)  | 61 (12.7)  |
| Grade 2         | 157 (1.1)   | 3296 (23.2) | 3453 (12.2)  | 3 (1.3)   | 39 (17.0)  | 42 (9.1)   | 6 (2.8)   | 57 (21.6)  | 63 (13.2)  |
| Grade 3         | 17 (0.1)    | 189 (1.3)   | 206 (0.7)    | 0         | 0          | 0          | 0         | 2 (0.8)    | 2 (0.4)    |

CI = Confidence intervals. N1 = Number of exposed participants who submitted any data for the event. Any = Grade 1 or higher. Percentages are based on the number of exposed participants who submitted any data for the event. 95% CI is calculated using the Clopper-Pearson method. Toxicity grade for Erythema (Redness) is defined as: G1 = 25 — 50 mm; G2 = 51 — 100 mm; G3 = > 100 mm. Toxicity grade for Fever is defined as: G1 = 38 — 38.4 C; G2 = 38.5 — 38.9 C; G3 = 39 — 40 C; G4 = >40 C. \*Localized axillary swelling or tenderness ipsilateral to the vaccination arm.

**Table S8. Unsolicited Adverse Events 28 Days after Any Injection, Overall Safety Set**

| Unsolicited Adverse Event<br>n (%)              | Overall Safety Set |                      |                  | ≥18-<65 years        |                        |                    | ≥65 years         |                     |                 |
|-------------------------------------------------|--------------------|----------------------|------------------|----------------------|------------------------|--------------------|-------------------|---------------------|-----------------|
|                                                 | Placebo<br>N=15166 | mRNA-1273<br>N=15185 | Total<br>N=30351 | Placebo<br>(N=11416) | mRNA-1273<br>(N=11415) | Total<br>(N=22831) | Placebo<br>N=3750 | mRNA-1273<br>N=3770 | Total<br>N=7520 |
| Regardless of relationship to study vaccination |                    |                      |                  |                      |                        |                    |                   |                     |                 |
| All                                             | 3277 (21.6)        | 3632 (23.9)          | 6909 (22.8)      | 2463 (21.6)          | 2674 (23.4)            | 5137 (22.5)        | 814 (21.7)        | 958 (25.4)          | 1772 (23.6)     |
| Serious                                         | 89 (0.6)           | 93 (0.6)             | 182 (0.6)        | 46 (0.4)             | 54 (0.5)               | 100 (0.4)          | 43 (1.1)          | 39 (1.0)            | 82 (1.1)        |
| Fatal                                           | 3 (<0.1)           | 2 (<0.1)             | 5 (<0.1)         | 1 (<0.1)             | 1 (<0.1)               | 2 (<0.1)           | 2 (<0.1)          | 1 (<0.1)            | 3 (<0.1)        |
| Medically-attended                              | 1465 (9.7)         | 1372 (9.0)           | 2837 (9.3)       | 1051 (9.2)           | 991 (8.7)              | 2042 (8.9)         | 414 (11.0)        | 381 (10.1)          | 795 (10.6)      |
| Leading to discontinuation from study vaccine*  | 80 (0.5)           | 50 (0.3)             | 130 (0.4)        | 62 (0.5)             | 37 (0.3)               | 99 (0.4)           | 18 (0.5)          | 13 (0.3)            | 31 (0.4)        |
| Leading to discontinuation from study†          | 2 (<0.1)           | 2 (<0.1)             | 4 (<0.1)         | 0                    | 1 (<0.1)               | 1 (<0.1)           | 2 (<0.1)          | 1 (<0.1)            | 3 (<0.1)        |
| Severe                                          | 202 (1.3)          | 234 (1.5)            | 436 (1.4)        | 132 (1.2)            | 156 (1.4)              | 288 (1.3)          | 70 (1.9)          | 78 (2.1)            | 148 (2.0)       |
| Related to study vaccination                    |                    |                      |                  |                      |                        |                    |                   |                     |                 |
| All                                             | 686 (4.5)          | 1242 (8.2)           | 1928 (6.4)       | 526 (4.6)            | 938 (8.2)              | 1464 (6.4)         | 160 (4.3)         | 304 (8.1)           | 464 (6.2)       |
| Serious                                         | 4 (<0.1)           | 6 (<0.1)             | 10 (<0.1)        | 3 (<0.1)             | 4 (<0.1)               | 7 (<0.1)           | 1 (<0.1)          | 2 (<0.1)            | 3 (<0.1)        |
| Fatal                                           | 0                  | 0                    | 0                | 0                    | 0                      | 0                  | 0                 | 0                   | 0               |
| Medically-attended                              | 83 (0.5)           | 140 (0.9)            | 223 (0.7)        | 68 (0.6)             | 110 (1.0)              | 178 (0.8)          | 15 (0.4)          | 30 (0.8)            | 45 (0.6)        |
| Leading to discontinuation from study vaccine*  | 15 (<0.1)          | 18 (0.1)             | 33 (0.1)         | 10 (<0.1)            | 14 (0.1)               | 24 (0.1)           | 5 (0.1)           | 4 (0.1)             | 9 (0.1)         |
| Leading to discontinuation from study†          | 0                  | 0                    | 0                | 0                    | 0                      | 0                  | 0                 | 0                   | 0               |
| Severe                                          | 28 (0.2)           | 71 (0.5)             | 99 (0.3)         | 19 (0.2)             | 49 (0.4)               | 68 (0.3)           | 9 (0.2)           | 22 (0.6)            | 31 (0.4)        |

An adverse event is defined as any event not present before exposure to study vaccination or any event already present that worsens in intensity or frequency after exposure. Percentages are based on overall safety set. \*AEs leading to study discontinuation 28 days after first dose. †AEs leading to discontinuation from study after either dose.

**Tables S9-11. Unsolicited Adverse Events, Overall Safety Set**

**Table S9. Summary of Unsolicited AE Reported by  $\geq 1\%$  of Participants in Any Treatment Group up to 28 Days After Any Injection**

| <b>System Organ Class Preferred Term n (%)</b>                                                                                                                                                                                                                                                                     | <b>Placebo (N=15166)</b> | <b>mRNA-1273 (N=15185)</b> |
|--------------------------------------------------------------------------------------------------------------------------------------------------------------------------------------------------------------------------------------------------------------------------------------------------------------------|--------------------------|----------------------------|
| Number of participants reporting unsolicited AEs                                                                                                                                                                                                                                                                   | 3277 (21.6)              | 3632 (23.9)                |
| Number of unsolicited AEs                                                                                                                                                                                                                                                                                          | 6085                     | 6798                       |
| Nervous system disorders                                                                                                                                                                                                                                                                                           | 622 (4.1)                | 684 (4.5)                  |
| Headache                                                                                                                                                                                                                                                                                                           | 458 (3.0)                | 466 (3.1)                  |
| Respiratory, thoracic and mediastinal disorders                                                                                                                                                                                                                                                                    | 583 (3.8)                | 536 (3.5)                  |
| Cough                                                                                                                                                                                                                                                                                                              | 156 (1.0)                | 164 (1.1)                  |
| Oropharyngeal pain                                                                                                                                                                                                                                                                                                 | 203 (1.3)                | 147 (1.0)                  |
| Gastrointestinal disorders                                                                                                                                                                                                                                                                                         | 440 (2.9)                | 478 (3.1)                  |
| Diarrhea                                                                                                                                                                                                                                                                                                           | 162 (1.1)                | 189 (1.2)                  |
| Musculoskeletal and connective tissue disorders                                                                                                                                                                                                                                                                    | 617 (4.1)                | 671 (4.4)                  |
| Arthralgia                                                                                                                                                                                                                                                                                                         | 167 (1.1)                | 207 (1.4)                  |
| Myalgia                                                                                                                                                                                                                                                                                                            | 181 (1.2)                | 200 (1.3)                  |
| General disorders and administration site conditions                                                                                                                                                                                                                                                               | 622 (4.1)                | 1006 (6.6)                 |
| Fatigue                                                                                                                                                                                                                                                                                                            | 336 (2.2)                | 372 (2.4)                  |
| Injection site pain                                                                                                                                                                                                                                                                                                | 54 (0.4)                 | 151 (1.0)                  |
| <p>AE = adverse event. An AE is defined as any event not present before exposure to study vaccination or any event already present that worsens in intensity or frequency after exposure. Percentages are based on the number of participants in the safety set. All AEs were coded using MedDRA Version 23.0.</p> |                          |                            |

**Table S10. Unsolicited Severe AEs Reported by  $\geq 5$  Participants in Any Treatment Group up to 28 Days After Any Injection, Overall Safety Set**

| <b>System Organ Class<br/>Preferred Term n (%)</b>                                                                                                                                                                                                                                | <b>Placebo<br/>(N=15166)</b> | <b>mRNA-1273<br/>(N=15185)</b> |
|-----------------------------------------------------------------------------------------------------------------------------------------------------------------------------------------------------------------------------------------------------------------------------------|------------------------------|--------------------------------|
| Number of participants reporting unsolicited severe AEs                                                                                                                                                                                                                           | 202 (1.3)                    | 234 (1.5)                      |
| Nervous system disorders                                                                                                                                                                                                                                                          | 21 (0.1)                     | 30 (0.2)                       |
| Headache                                                                                                                                                                                                                                                                          | 12 (<0.1)                    | 20 (0.1)                       |
| Cardiac disorders                                                                                                                                                                                                                                                                 | 13 (<0.1)                    | 13 (<0.1)                      |
| Bradycardia                                                                                                                                                                                                                                                                       | 5 (<0.1)                     | 4 (<0.1)                       |
| Atrial Fibrillation                                                                                                                                                                                                                                                               | 3 (<0.1)                     | 4 (<0.1)                       |
| Vascular disorders                                                                                                                                                                                                                                                                | 43 (0.3)                     | 30 (0.2)                       |
| Hypertension                                                                                                                                                                                                                                                                      | 32 (0.2)                     | 23 (0.2)                       |
| Musculoskeletal and connective tissue disorders                                                                                                                                                                                                                                   | 24 (0.2)                     | 23 (0.2)                       |
| Myalgia                                                                                                                                                                                                                                                                           | 2 (<0.1)                     | 10 (<0.1)                      |
| Arthralgia                                                                                                                                                                                                                                                                        | 2 (<0.1)                     | 8 (<0.1)                       |
| Back pain                                                                                                                                                                                                                                                                         | 7 (<0.1)                     | 1 (<0.1)                       |
| General disorders and administration site conditions                                                                                                                                                                                                                              | 13 (<0.1)                    | 49 (0.3)                       |
| Fatigue                                                                                                                                                                                                                                                                           | 6 (<0.1)                     | 12 (<0.1)                      |
| Injection site erythema                                                                                                                                                                                                                                                           | 0                            | 11 (<0.1)                      |
| Injection site pain                                                                                                                                                                                                                                                               | 1 (<0.1)                     | 3 (<0.1)                       |
| Investigations                                                                                                                                                                                                                                                                    | 13 (<0.1)                    | 23 (0.2)                       |
| Blood pressure increased                                                                                                                                                                                                                                                          | 6 (<0.1)                     | 11 (<0.1)                      |
| Blood pressure systolic increased                                                                                                                                                                                                                                                 | 7 (<0.1)                     | 7 (<0.1)                       |
| An AE is defined as any event not present before exposure to study vaccination or any event already present that worsens in intensity or frequency after exposure. Percentages were based on the number of safety set participants. All AEs were coded using MedDRA Version 23.0. |                              |                                |

**Table S11. Serious AEs Reported by Preferred Term in Any Treatment Group, Overall Safety Set**

| <b>System Organ Class Preferred Term n (%)</b> | <b>Placebo (N=15166)</b> | <b>mRNA-1273 N=15185</b> |
|------------------------------------------------|--------------------------|--------------------------|
| Number of participants reporting serious AEs   | 153 (1.0)                | 147 (1.0)                |
| Number of serious AEs                          | 211                      | 207                      |
| Atrial fibrillation                            | 5 (<0.1)                 | 5 (<0.1)                 |
| Myocardial infarction                          | 3 (<0.1)                 | 5 (<0.1)                 |
| Pneumonia                                      | 7 (<0.1)                 | 5 (<0.1)                 |
| Pulmonary embolism                             | 5 (<0.1)                 | 4 (<0.1)                 |
| Abdominal pain upper                           | 0                        | 3 (<0.1)                 |
| Cardiac failure congestive                     | 3 (<0.1)                 | 3 (<0.1)                 |
| Cerebrovascular accident                       | 1 (<0.1)                 | 3 (<0.1)                 |
| Cholecystitis                                  | 0                        | 3 (<0.1)                 |
| Dehydration                                    | 3 (<0.1)                 | 3 (<0.1)                 |
| Dyspnoea                                       | 0                        | 3 (<0.1)                 |
| Nausea                                         | 1 (<0.1)                 | 3 (<0.1)                 |
| Nephrolithiasis                                | 0                        | 3 (<0.1)                 |
| Prostate cancer                                | 3 (<0.1)                 | 3 (<0.1)                 |
| Acute respiratory failure                      | 2 (<0.1)                 | 2 (<0.1)                 |
| Acute coronary syndrome                        | 0                        | 2 (<0.1)                 |
| Acute myocardial infarction                    | 4 (<0.1)                 | 2 (<0.1)                 |
| Appendicitis                                   | 3 (<0.1)                 | 2 (<0.1)                 |
| Arthritis                                      | 1 (<0.1)                 | 2 (<0.1)                 |
| Cervical vertebral fracture                    | 0                        | 2 (<0.1)                 |
| Chest pain                                     | 1 (<0.1)                 | 2 (<0.1)                 |
| Colitis                                        | 1 (<0.1)                 | 2 (<0.1)                 |
| Coronary artery disease                        | 2 (<0.1)                 | 2 (<0.1)                 |
| Deep vein thrombosis                           | 0                        | 2 (<0.1)                 |
| Diarrhoea                                      | 1 (<0.1)                 | 2 (<0.1)                 |
| Embolic stroke                                 | 0                        | 2 (<0.1)                 |
| Fall                                           | 3 (<0.1)                 | 2 (<0.1)                 |
| Hiatus hernia                                  | 1 (<0.1)                 | 2 (<0.1)                 |
| Hypertension                                   | 1 (<0.1)                 | 2 (<0.1)                 |
| Respiratory Failure                            | 1 (<0.1)                 | 2 (<0.1)                 |
| Road traffic accident                          | 1 (<0.1)                 | 2 (<0.1)                 |
| Seizure                                        | 0                        | 2 (<0.1)                 |
| Spinal stenosis                                | 1 (<0.1)                 | 2 (<0.1)                 |
| Subdural hematoma                              | 0                        | 2 (<0.1)                 |
| Swelling face                                  | 1 (<0.1)                 | 2 (<0.1)                 |
| Syncope                                        | 4 (<0.1)                 | 2 (<0.1)                 |
| Acute kidney injury                            | 3 (<0.1)                 | 1 (<0.1)                 |
| Covid-19                                       | 15 (<0.1)                | 1 (<0.1)                 |
| Hip fracture                                   | 2 (<0.1)                 | 1 (<0.1)                 |
| Thyroidectomy                                  | 0                        | 1 (<0.1)                 |
| Abdominal pain                                 | 2 (<0.1)                 | 0                        |
| Anaemia                                        | 2 (<0.1)                 | 0                        |
| Ankle fracture                                 | 3 (<0.1)                 | 0                        |
| Chronic obstructive pulmonary disease          | 4 (<0.1)                 | 0                        |
| Confusional state                              | 2 (<0.1)                 | 0                        |
| Depression                                     | 3 (<0.1)                 | 0                        |
| Diverticulitis                                 | 2 (<0.1)                 | 0                        |
| Hypertensive emergency                         | 2 (<0.1)                 | 0                        |
| Intervertebral disc protrusion                 | 1 (<0.1)                 | 0                        |
| Intraductal proliferative breast lesion        | 2 (<0.1)                 | 0                        |
| Major depression                               | 2 (<0.1)                 | 0                        |
| Urinary tract infection                        | 4 (<0.1)                 | 0                        |

AE is defined as any event not present before exposure to study vaccination or any event already present that worsens in intensity or frequency after exposure. Percentages are based on the number of participants in the safety set. All AEs were coded using MedDRA Version 23.0.

**Table S12. Unsolicited Adverse Events of Hypersensitivity, Overall Safety Set**

| Preferred term n (%)                    | Placebo   | mRNA-1273 |
|-----------------------------------------|-----------|-----------|
|                                         | (N=15166) | (N=15185) |
| Participants reporting hypersensitivity | 166 (1.1) | 233 (1.5) |
| Allergic sinusitis                      | 1 (<0.1)  | 2 (<0.1)  |
| Anaphylactic reaction                   | 1 (<0.1)  | 1 (<0.1)  |
| Angioedema                              | 3 (<0.1)  | 1 (<0.1)  |
| Bronchospasm                            | 0         | 1 (<0.1)  |
| Conjunctivitis allergic                 | 2 (<0.1)  | 2 (<0.1)  |
| Dermatitis                              | 8 (<0.1)  | 8 (<0.1)  |
| Dermatitis allergic                     | 3 (<0.1)  | 2 (<0.1)  |
| Dermatitis atopic                       | 7 (<0.1)  | 4 (<0.1)  |
| Dermatitis bullous                      | 2 (<0.1)  | 0         |
| Dermatitis contact                      | 29 (0.2)  | 21 (0.1)  |
| Drug hypersensitivity                   | 4 (<0.1)  | 4 (<0.1)  |
| Eczema                                  | 4 (<0.1)  | 3 (<0.1)  |
| Exfoliative rash                        | 0         | 1 (<0.1)  |
| Eye swelling                            | 2 (<0.1)  | 2 (<0.1)  |
| Hand dermatitis                         | 0         | 2 (<0.1)  |
| Hypersensitivity                        | 4 (<0.1)  | 5 (<0.1)  |
| Idiopathic urticaria                    | 1 (<0.1)  | 0         |
| Injection related reaction              | 1 (<0.1)  | 1 (<0.1)  |
| Injection site rash                     | 1 (<0.1)  | 37 (0.2)  |
| Injection site urticaria                | 0         | 15 (<0.1) |
| Laryngeal oedema                        | 1 (<0.1)  | 0         |
| Lip swelling                            | 2 (<0.1)  | 2 (<0.1)  |
| Palatal oedema                          | 1 (<0.1)  | 0         |
| Periorbital oedema                      | 1 (<0.1)  | 0         |
| Periorbital swelling                    | 2 (<0.1)  | 0         |
| Rash                                    | 34 (0.2)  | 45 (0.3)  |
| Rash erythematous                       | 2 (<0.1)  | 6 (<0.1)  |
| Rash follicular                         | 1 (<0.1)  | 0         |
| Rash macular                            | 4 (<0.1)  | 6 (<0.1)  |
| Rash maculo-papular                     | 2 (<0.1)  | 11 (<0.1) |
| Rash pruritic                           | 4 (<0.1)  | 6 (<0.1)  |
| Rash vesicular                          | 0         | 3 (<0.1)  |
| Rhinitis allergic                       | 13 (<0.1) | 10 (<0.1) |
| Serum sickness                          | 1 (<0.1)  | 0         |
| Swelling face                           | 2 (<0.1)  | 4 (<0.1)  |
| Swelling of eyelid                      | 1 (<0.1)  | 2 (<0.1)  |
| Swollen tongue                          | 0         | 2 (<0.1)  |
| Type IV hypersensitivity reaction       | 0         | 1 (<0.1)  |
| Urticaria                               | 23 (0.2)  | 27 (0.2)  |
| Urticaria papular                       | 5 (<0.1)  | 3 (<0.1)  |
| Vaccination site rash                   | 0         | 1 (<0.1)  |

Percentages are based on the number of participants in the safety set. Preferred term by MedDRA version 23.0. Hypersensitivity was identified through selected SMQ.



**Table S13. Covid-19 Symptoms and Severity, Per-protocol Set**

| Covid-19 Symptom n (%)                                                                                                                                                                                                                                                                                                                                                                                                                                                                                                                                 | All Covid-19 cases |                   | Severe Covid-19 cases |                 |
|--------------------------------------------------------------------------------------------------------------------------------------------------------------------------------------------------------------------------------------------------------------------------------------------------------------------------------------------------------------------------------------------------------------------------------------------------------------------------------------------------------------------------------------------------------|--------------------|-------------------|-----------------------|-----------------|
|                                                                                                                                                                                                                                                                                                                                                                                                                                                                                                                                                        | Placebo (N=185)    | mRNA-1273 (N=11)* | Placebo (N=30)        | mRNA-1273 (N=0) |
| Number of participants with any symptom                                                                                                                                                                                                                                                                                                                                                                                                                                                                                                                | 185 (100)          | 11 (100)          | 30 (100)              | 0               |
| Respiratory symptom                                                                                                                                                                                                                                                                                                                                                                                                                                                                                                                                    |                    |                   |                       |                 |
| Clinical evidence of pneumonia                                                                                                                                                                                                                                                                                                                                                                                                                                                                                                                         | 4 (2.2)            | 0                 | 4 (13.3)              | 0               |
| Cough                                                                                                                                                                                                                                                                                                                                                                                                                                                                                                                                                  | 155 (83.8)         | 6 (54.5)          | 28 (93.3)             | 0               |
| Difficulty breathing                                                                                                                                                                                                                                                                                                                                                                                                                                                                                                                                   | 55 (29.7)          | 1 (9.1)           | 16 (53.3)             | 0               |
| Radiographical evidence of pneumonia                                                                                                                                                                                                                                                                                                                                                                                                                                                                                                                   | 3 (1.6)            | 0                 | 3 (10.0)              | 0               |
| Shortness of breath                                                                                                                                                                                                                                                                                                                                                                                                                                                                                                                                    | 78 (42.2)          | 2 (18.2)          | 23 (76.7)             | 0               |
| Systemic symptom                                                                                                                                                                                                                                                                                                                                                                                                                                                                                                                                       |                    |                   |                       |                 |
| Body aches                                                                                                                                                                                                                                                                                                                                                                                                                                                                                                                                             | 111 (60.0)         | 7 (63.6)          | 26 (86.7)             | 0               |
| Chills                                                                                                                                                                                                                                                                                                                                                                                                                                                                                                                                                 | 95 (51.4)          | 4 (36.4)          | 19 (63.3)             | 0               |
| Diarrhea                                                                                                                                                                                                                                                                                                                                                                                                                                                                                                                                               | 70 (37.8)          | 2 (18.2)          | 14 (46.7)             | 0               |
| Fatigue                                                                                                                                                                                                                                                                                                                                                                                                                                                                                                                                                | 156 (84.3)         | 9 (81.8)          | 27 (90.0)             | 0               |
| Fever†                                                                                                                                                                                                                                                                                                                                                                                                                                                                                                                                                 | 54 (29.2)          | 2 (18.2)          | 13 (43.3)             | 0               |
| Headache                                                                                                                                                                                                                                                                                                                                                                                                                                                                                                                                               | 145 (78.4)         | 10 (90.9)         | 25 (83.3)             | 0               |
| Muscle aches (myalgia)                                                                                                                                                                                                                                                                                                                                                                                                                                                                                                                                 | 114 (61.6)         | 5 (45.5)          | 24 (80.0)             | 0               |
| Nasal congestion                                                                                                                                                                                                                                                                                                                                                                                                                                                                                                                                       | 138 (74.6)         | 8 (72.7)          | 21 (70.0)             | 0               |
| Nausea                                                                                                                                                                                                                                                                                                                                                                                                                                                                                                                                                 | 65 (35.1)          | 3 (27.3)          | 13 (43.3)             | 0               |
| New loss of smell                                                                                                                                                                                                                                                                                                                                                                                                                                                                                                                                      | 115 (62.2)         | 3 (27.3)          | 16 (53.3)             | 0               |
| New loss of taste                                                                                                                                                                                                                                                                                                                                                                                                                                                                                                                                      | 106 (57.3)         | 3 (27.3)          | 15 (50.0)             | 0               |
| Runny nose (rhinorrhea)                                                                                                                                                                                                                                                                                                                                                                                                                                                                                                                                | 121 (65.4)         | 6 (54.5)          | 18 (60.0)             | 0               |
| Sore throat                                                                                                                                                                                                                                                                                                                                                                                                                                                                                                                                            | 85 (45.9)          | 7 (63.6)          | 15 (50.0)             | 0               |
| Vomiting                                                                                                                                                                                                                                                                                                                                                                                                                                                                                                                                               | 18 (9.7)           | 1 (9.1)           | 7 (23.3)              | 0               |
| Number of participants with any severe symptom                                                                                                                                                                                                                                                                                                                                                                                                                                                                                                         | 32 (17.3)          | 0                 | 30 (100)              | 0               |
| Acute renal dysfunction                                                                                                                                                                                                                                                                                                                                                                                                                                                                                                                                | 2 (1.1)            | 0                 | 2 (6.7)               | 0               |
| Acute Respiratory Distress Syndrome                                                                                                                                                                                                                                                                                                                                                                                                                                                                                                                    | 1 (0.5)            | 0                 | 1 (3.3)               | 0               |
| ECMO                                                                                                                                                                                                                                                                                                                                                                                                                                                                                                                                                   | 0                  | 0                 | 0                     | 0               |
| High-flow oxygen                                                                                                                                                                                                                                                                                                                                                                                                                                                                                                                                       | 1 (0.5)            | 0                 | 1 (3.3)               | 0               |
| Mechanical ventilation                                                                                                                                                                                                                                                                                                                                                                                                                                                                                                                                 | 0                  | 0                 | 0                     | 0               |
| Non-Invasive ventilation                                                                                                                                                                                                                                                                                                                                                                                                                                                                                                                               | 1 (0.5)            | 0                 | 1 (3.3)               | 0               |
| Admission to an intensive care unit due to SARS-CoV-2                                                                                                                                                                                                                                                                                                                                                                                                                                                                                                  | 1 (0.5)            | 0                 | 1 (3.3)               | 0               |
| Heart Rate ≥125 beats per minute                                                                                                                                                                                                                                                                                                                                                                                                                                                                                                                       | 0                  | 0                 | 0                     | 0               |
| Hepatic dysfunction                                                                                                                                                                                                                                                                                                                                                                                                                                                                                                                                    | 0                  | 0                 | 0                     | 0               |
| Neurologic dysfunction                                                                                                                                                                                                                                                                                                                                                                                                                                                                                                                                 | 1 (0.5)            | 0                 | 1 (3.3)               | 0               |
| Oxygen saturation ≤93‡                                                                                                                                                                                                                                                                                                                                                                                                                                                                                                                                 | 28 (15.1)          | 0                 | 27 (90.0)             | 0               |
| Oxygen saturation SpO2 ≤93% on room air at sea level                                                                                                                                                                                                                                                                                                                                                                                                                                                                                                   | 29 (15.7)          | 0                 | 28 (93.3)             | 0               |
| PaO2/FIO2 ratio <300 mmHg                                                                                                                                                                                                                                                                                                                                                                                                                                                                                                                              | 0                  | 0                 | 0                     | 0               |
| Respiratory failure                                                                                                                                                                                                                                                                                                                                                                                                                                                                                                                                    | 1 (0.5)            | 0                 | 1 (3.3)               | 0               |
| Respiratory rate ≥30 per minute                                                                                                                                                                                                                                                                                                                                                                                                                                                                                                                        | 0                  | 0                 | 0                     | 0               |
| Systolic blood pressure <90 mmHg, diastolic blood Pressure <60 mmHg                                                                                                                                                                                                                                                                                                                                                                                                                                                                                    | 5 (2.7)            | 0                 | 4 (13.3)              | 0               |
| Vasopressors required                                                                                                                                                                                                                                                                                                                                                                                                                                                                                                                                  | 0                  | 0                 | 0                     | 0               |
| <p>Note symptoms are shown for participants with all cases of 196 Covid-19 and those 30 that were considered severe cases. All symptoms reported are included, regardless of relationship with the positive RT-PCR test used to define the case of Covid-19 in PP set. Participants can be counted in more than one category. *There were 7 Covid-19 cases reported before 14 days post-dose 2. †Derived based on temperature collected on case report form (CRF) symptoms. ‡Derived based on oxygen saturation collected on CRF symptom log page.</p> |                    |                   |                       |                 |

**Table S14. Characteristics of Participants with Severe Covid-19 Cases, Per-protocol Set**

| Characteristics n (%)                                                                                                                           | Covid-19 cases<br>Placebo N=30 |
|-------------------------------------------------------------------------------------------------------------------------------------------------|--------------------------------|
| Sex                                                                                                                                             |                                |
| Female                                                                                                                                          | 17 (57)                        |
| Male                                                                                                                                            | 13 (43)                        |
| Age, years                                                                                                                                      |                                |
| Mean (range)                                                                                                                                    | 54.4 (23-80)                   |
| ≥65 years                                                                                                                                       | 10 (33)                        |
| Race/Ethnicity                                                                                                                                  |                                |
| White, not hispanic or Latino                                                                                                                   | 24 (80)                        |
| White, Hispanic or Latino                                                                                                                       | 2 (7)                          |
| Black/African American, Not Hispanic or Latino                                                                                                  | 1 (3)                          |
| Not reported/other, Hispanic or Latino                                                                                                          | 2 (7)                          |
| Multiple, Not Hispanic or Latino                                                                                                                | 1 (3)                          |
| Hospitalized                                                                                                                                    | 9 (30)                         |
| ICU                                                                                                                                             | 2 (7)                          |
| Co-morbid conditions (chronic lung, severe obesity, cardiac, diabetes, hypertension and/or asthma)                                              | 20 (67)                        |
| Clinical signs indicative of severe system illness                                                                                              |                                |
| Oxygen saturation ≤93%*                                                                                                                         | 28 (93)                        |
| Respiratory failure or Acute Respiratory Distress Syndrome                                                                                      | 6 (20)                         |
| Significant acute renal or neurologic dysfunction                                                                                               | 2 (7)                          |
| *Derived based on oxygen saturation collected on CRF symptom log page. Covid-19 cases in the PP set. Data from December 3 <sup>rd</sup> , 2020. |                                |

**Table S15. Serious and Severe Treatment-related AEs Up to 28 days after Any Injection, Overall Safety Set**

| System organ class, preferred term<br>n (%) | Placebo  | mRNA-1273 | Total     |
|---------------------------------------------|----------|-----------|-----------|
|                                             | N=15166  | N=15185   | (N=30351) |
| <b>Serious AEs</b>                          |          |           |           |
| Incidence of unsolicited AEs                | 4 (<0.1) | 6 (<0.1)  | 10 (<0.1) |
| Autonomic nervous system imbalance          | 0        | 1 (<0.1)  | 1 (<0.1)  |
| Paraesthesia                                | 1 (<0.1) | 0         | 1 (<0.1)  |
| Dyspnoea                                    | 0        | 1 (<0.1)  | 1 (<0.1)  |
| Pulmonary embolism                          | 1 (<0.1) | 0         | 1 (<0.1)  |
| Nausea                                      | 0        | 1 (<0.1)  | 1 (<0.1)  |
| Vomiting                                    | 0        | 1 (<0.1)  | 1 (<0.1)  |
| Rheumatoid arthritis                        | 0        | 1 (<0.1)  | 1 (<0.1)  |
| Polymyalgia rheumatica                      | 1 (<0.1) | 0         | 1 (<0.1)  |
| Swelling face                               | 1 (<0.1) | 2 (<0.1)  | 3 (<0.1)  |
| Edema peripheral                            | 0        | 1 (<0.1)  | 1 (<0.1)  |
| Feeling hot                                 | 1 (<0.1) | 0         | 1 (<0.1)  |
| Immunization anxiety-related reaction       | 1 (<0.1) | 0         | 1 (<0.1)  |
| Procedural haemorrhage                      | 1 (<0.1) | 0         | 1 (<0.1)  |
| <b>Severe AEs</b>                           |          |           |           |
| Incidence of unsolicited severe AEs         | 28 (0.2) | 71 (0.5)  | 99 (0.3)  |
| Lymphadenopathy                             | 1 (<0.1) | 1 (<0.1)  | 2 (<0.1)  |
| Type IV hypersensitivity reaction           | 0        | 1 (<0.1)  | 1 (<0.1)  |
| Headache                                    | 8 (<0.1) | 9 (<0.1)  | 17 (<0.1) |
| Dizziness                                   | 1 (<0.1) | 1 (<0.1)  | 2 (<0.1)  |
| Movement disorder                           | 0        | 1 (<0.1)  | 1 (<0.1)  |
| Syncope                                     | 0        | 1 (<0.1)  | 1 (<0.1)  |
| Migraine                                    | 1 (<0.1) | 0         | 1 (<0.1)  |
| Vertigo                                     | 0        | 0         | 1 (<0.1)  |
| Hypertension                                | 9 (<0.1) | 4 (<0.1)  | 13 (<0.1) |
| Nausea                                      | 0        | 1 (<0.1)  | 1 (<0.1)  |
| Dermatitis                                  | 0        | 1 (<0.1)  | 1 (<0.1)  |
| Rash                                        | 0        | 1 (<0.1)  | 1 (<0.1)  |
| Rash macular                                | 0        | 1 (<0.1)  | 1 (<0.1)  |
| Myalgia                                     | 0        | 6 (<0.1)  | 6 (<0.1)  |
| Arthralgia                                  | 2 (<0.1) | 3 (<0.1)  | 5 (<0.1)  |
| Muscle spasms                               | 0        | 2 (<0.1)  | 2 (<0.1)  |
| Neck pain                                   | 0        | 1 (<0.1)  | 1 (<0.1)  |
| Pain in extremity                           | 0        | 1 (<0.1)  | 1 (<0.1)  |
| Temporomandibular joint syndrome            | 0        | 1 (<0.1)  | 1 (<0.1)  |
| Back pain                                   | 1 (<0.1) | 0         | 1 (<0.1)  |
| Polymyalgia rheumatica                      | 1 (<0.1) | 0         | 1 (<0.1)  |
| Injection site erythema                     | 0        | 11 (<0.1) | 11 (<0.1) |
| Fatigue                                     | 2 (<0.1) | 9 (<0.1)  | 11 (<0.1) |
| Injection site swelling                     | 0        | 4 (<0.1)  | 4 (<0.1)  |
| Injection site macule                       | 0        | 3 (<0.1)  | 3 (<0.1)  |
| Chills                                      | 0        | 2 (<0.1)  | 2 (<0.1)  |
| Injection site lymphadenopathy              | 0        | 2 (<0.1)  | 2 (<0.1)  |
| Injection site pain                         | 1 (<0.1) | 2 (<0.1)  | 3 (<0.1)  |
| Adverse drug reaction                       | 0        | 1 (<0.1)  | 1 (<0.1)  |
| Chest discomfort                            | 0        | 1 (<0.1)  | 1 (<0.1)  |
| Injection site induration                   | 0        | 1 (<0.1)  | 1 (<0.1)  |
| Injection site rash                         | 0        | 1 (<0.1)  | 1 (<0.1)  |
| Malaise                                     | 0        | 1 (<0.1)  | 1 (<0.1)  |
| Pyrexia                                     | 0        | 1 (<0.1)  | 1 (<0.1)  |
| Swelling face                               | 0        | 1 (<0.1)  | 1 (<0.1)  |
| Asthenia                                    | 1 (<0.1) | 0         | 1 (<0.1)  |
| Blood pressure increased                    | 2 (<0.1) | 5 (<0.1)  | 7 (<0.1)  |
| Blood pressure systolic increased           | 0        | 1 (<0.1)  | 1 (<0.1)  |

Adverse event (AE) was defined as any event not present before exposure to study vaccination or any event already present that worsens in intensity or frequency after exposure. Percentages are based on the number of participants in the safety set. All AEs were coded using MedDRA Version 23.0.

**Table S16. Efficacy of Key Secondary Endpoints, Per-protocol Set**

| Secondary endpoint                                                                                                                                                                                                                                                                                                                                                                                                                                                                                                                                                                                                                                                                                                                                                                                                                                                       | Placebo   | mRNA-1273           |
|--------------------------------------------------------------------------------------------------------------------------------------------------------------------------------------------------------------------------------------------------------------------------------------------------------------------------------------------------------------------------------------------------------------------------------------------------------------------------------------------------------------------------------------------------------------------------------------------------------------------------------------------------------------------------------------------------------------------------------------------------------------------------------------------------------------------------------------------------------------------------|-----------|---------------------|
|                                                                                                                                                                                                                                                                                                                                                                                                                                                                                                                                                                                                                                                                                                                                                                                                                                                                          | (N=14073) | (N=14073)           |
| Severe Covid-19 starting 14 days after second injection, adjudicated                                                                                                                                                                                                                                                                                                                                                                                                                                                                                                                                                                                                                                                                                                                                                                                                     |           |                     |
| n, events, PP                                                                                                                                                                                                                                                                                                                                                                                                                                                                                                                                                                                                                                                                                                                                                                                                                                                            | 30        | 0                   |
| VE Based on Hazard Ratio (95% CI)*                                                                                                                                                                                                                                                                                                                                                                                                                                                                                                                                                                                                                                                                                                                                                                                                                                       |           | 1.00 (NE-1.00)      |
| Covid-19 after the first dose†                                                                                                                                                                                                                                                                                                                                                                                                                                                                                                                                                                                                                                                                                                                                                                                                                                           |           |                     |
| n, events, PP                                                                                                                                                                                                                                                                                                                                                                                                                                                                                                                                                                                                                                                                                                                                                                                                                                                            | 225       | 11                  |
| VE Based on Hazard Ratio (95% CI)                                                                                                                                                                                                                                                                                                                                                                                                                                                                                                                                                                                                                                                                                                                                                                                                                                        |           | 0.952 (0.912-0.974) |
| Secondary definition of Covid-19 starting 14 days after second injection‡                                                                                                                                                                                                                                                                                                                                                                                                                                                                                                                                                                                                                                                                                                                                                                                                |           |                     |
| n, events, PP                                                                                                                                                                                                                                                                                                                                                                                                                                                                                                                                                                                                                                                                                                                                                                                                                                                            | 221       | 11                  |
| VE Based on Hazard Ratio (95% CI)                                                                                                                                                                                                                                                                                                                                                                                                                                                                                                                                                                                                                                                                                                                                                                                                                                        |           | 0.951 (0.911-0.973) |
| Covid-19 after the second injection regardless of prior SARS-CoV-2 infection, adjudicated                                                                                                                                                                                                                                                                                                                                                                                                                                                                                                                                                                                                                                                                                                                                                                                |           |                     |
| n/N events§ FAS                                                                                                                                                                                                                                                                                                                                                                                                                                                                                                                                                                                                                                                                                                                                                                                                                                                          | 187/15170 | 12/15181            |
| VE Based on Hazard Ratio (95% CI)                                                                                                                                                                                                                                                                                                                                                                                                                                                                                                                                                                                                                                                                                                                                                                                                                                        |           | 0.936 (0.886-0.965) |
| PP=per-protocol set; FAS=full analysis set. *Vaccine efficacy (VE), defined as 1 - hazard ratio (mRNA-1273 vs placebo), and 95% CI estimated using a stratified Cox proportional hazard model with Efron's method of tie handling and with the treatment group as a covariate, adjusting for stratification factor. †Inclusive of second doses. ‡Secondary case definition of Covid-19 was defined as including systemic symptoms: fever (temperature ≥ 38°C) or chills, cough, shortness of breath or difficulty breathing, fatigue, muscle aches or body aches, headache, new loss of taste or smell, sore throat, nasal congestion or rhinorrhea, nausea or vomiting or diarrhea AND a positive NP swab, nasal swab, or saliva sample (or respiratory sample, if hospitalized) for SARS-CoV-2 by RT-PCR. §n and N are based on the number of participants in the FAS. |           |                     |

**Table S17. Vaccine Efficacy by SARS-COV-2 Status, Modified Intent-to-Treat**

| <b>Baseline SARS-CoV-2 Status<br/>n (%)</b>                                                                                                                                                                                                                                                                                                                                                                                                                                                                                                                                                                                                                                                                                                                                                                                                                                                                                                                                                                                                                                                                                                                                                     | <b>Placebo</b>    | <b>mRNA-1273</b>    |
|-------------------------------------------------------------------------------------------------------------------------------------------------------------------------------------------------------------------------------------------------------------------------------------------------------------------------------------------------------------------------------------------------------------------------------------------------------------------------------------------------------------------------------------------------------------------------------------------------------------------------------------------------------------------------------------------------------------------------------------------------------------------------------------------------------------------------------------------------------------------------------------------------------------------------------------------------------------------------------------------------------------------------------------------------------------------------------------------------------------------------------------------------------------------------------------------------|-------------------|---------------------|
| <b>Negative</b>                                                                                                                                                                                                                                                                                                                                                                                                                                                                                                                                                                                                                                                                                                                                                                                                                                                                                                                                                                                                                                                                                                                                                                                 | <b>N=14598</b>    | <b>N=14550</b>      |
| Number with Covid-19                                                                                                                                                                                                                                                                                                                                                                                                                                                                                                                                                                                                                                                                                                                                                                                                                                                                                                                                                                                                                                                                                                                                                                            | 185 (1.3)         | 12 (<0.1)           |
| Number censored                                                                                                                                                                                                                                                                                                                                                                                                                                                                                                                                                                                                                                                                                                                                                                                                                                                                                                                                                                                                                                                                                                                                                                                 | 14413 (98.7)      | 14538 (>99.9)       |
| VE Based on HR (95% CI)                                                                                                                                                                                                                                                                                                                                                                                                                                                                                                                                                                                                                                                                                                                                                                                                                                                                                                                                                                                                                                                                                                                                                                         |                   | 0.936 (0.885-0.964) |
| Person-Years                                                                                                                                                                                                                                                                                                                                                                                                                                                                                                                                                                                                                                                                                                                                                                                                                                                                                                                                                                                                                                                                                                                                                                                    | 3382.9            | 3390.1              |
| Incidence rate per 1,000 Person-Years (95% CI)                                                                                                                                                                                                                                                                                                                                                                                                                                                                                                                                                                                                                                                                                                                                                                                                                                                                                                                                                                                                                                                                                                                                                  | 54.7 (47.1- 63.2) | 3.6 (1.8-6.2)       |
| VE based on incidence rate (95% CI)                                                                                                                                                                                                                                                                                                                                                                                                                                                                                                                                                                                                                                                                                                                                                                                                                                                                                                                                                                                                                                                                                                                                                             |                   | 0.935 (0.884-0.967) |
| <b>Positive</b>                                                                                                                                                                                                                                                                                                                                                                                                                                                                                                                                                                                                                                                                                                                                                                                                                                                                                                                                                                                                                                                                                                                                                                                 | <b>N=337</b>      | <b>N=343</b>        |
| Number with Covid-19                                                                                                                                                                                                                                                                                                                                                                                                                                                                                                                                                                                                                                                                                                                                                                                                                                                                                                                                                                                                                                                                                                                                                                            | 1 (0.3)           | 0                   |
| Number Censored                                                                                                                                                                                                                                                                                                                                                                                                                                                                                                                                                                                                                                                                                                                                                                                                                                                                                                                                                                                                                                                                                                                                                                                 | 336 (99.7)        | 343 (100)           |
| VE Based on HR (95% CI)                                                                                                                                                                                                                                                                                                                                                                                                                                                                                                                                                                                                                                                                                                                                                                                                                                                                                                                                                                                                                                                                                                                                                                         |                   | 1.000 (NE-1.000)    |
| Person-Years                                                                                                                                                                                                                                                                                                                                                                                                                                                                                                                                                                                                                                                                                                                                                                                                                                                                                                                                                                                                                                                                                                                                                                                    | 71.9              | 71.4                |
| Incidence rate per 1,000 Person-Years (95% CI)*                                                                                                                                                                                                                                                                                                                                                                                                                                                                                                                                                                                                                                                                                                                                                                                                                                                                                                                                                                                                                                                                                                                                                 | 13.9 (0.4-77.5)   | 0.0 (NE-51.7)       |
| VE based on incidence rate (95% CI)                                                                                                                                                                                                                                                                                                                                                                                                                                                                                                                                                                                                                                                                                                                                                                                                                                                                                                                                                                                                                                                                                                                                                             |                   | 1.000 (-38.3-NE)    |
| <p>HR=hazard ratio. VE=vaccine efficacy. VE was defined as 1 - hazard ratio (mRNA-1273 vs. placebo); 95% CI were estimated using a stratified Cox proportional hazard model with Efron's method of tie handling with the treatment group as a covariate, adjusting for stratification factor if applicable in mITT set. Person-years was defined as the total years from randomization date to the date of Covid-19, last date of study participation, or efficacy data cutoff date, whichever was earlier. *Incidence rate was defined as the number of participants with an event divided by the number of participants at risk, adjusted by person-years (total time at risk) in each treatment group; the 95% CI was calculated using the exact method (Poisson distribution) adjusted by person-years and VE was defined as 1 — ratio of incidence rate (mRNA-1273 vs. placebo). Baseline SARS-CoV-2 Status was considered positive based on immunologic or virologic evidence of prior Covid-19, defined as positive RT-PCR test or bAb result at day 1; negative was defined as negative RT-PCR test and bAb results at day 1. Covid-19 cases were diagnosed by symptoms and RT-PCR.</p> |                   |                     |

**Table S18. Preliminary Analysis of Infection from Randomization, Modified Intent-to-Treat**

|                                                                                                                                                                                                                                                                                                                                                                                                                                                                                                                                                                                                                                                                                                                                                                                                                                                                                                                                                                                                                                                                                                                                                                              | <b>Placebo<br/>N=14598</b> | <b>mRNA-1273<br/>N=14550</b> | <b>Vaccine efficacy<br/>(95% CI)</b> |
|------------------------------------------------------------------------------------------------------------------------------------------------------------------------------------------------------------------------------------------------------------------------------------------------------------------------------------------------------------------------------------------------------------------------------------------------------------------------------------------------------------------------------------------------------------------------------------------------------------------------------------------------------------------------------------------------------------------------------------------------------------------------------------------------------------------------------------------------------------------------------------------------------------------------------------------------------------------------------------------------------------------------------------------------------------------------------------------------------------------------------------------------------------------------------|----------------------------|------------------------------|--------------------------------------|
| Symptomatic Covid-19                                                                                                                                                                                                                                                                                                                                                                                                                                                                                                                                                                                                                                                                                                                                                                                                                                                                                                                                                                                                                                                                                                                                                         | 293                        | 20                           |                                      |
| Covid -19                                                                                                                                                                                                                                                                                                                                                                                                                                                                                                                                                                                                                                                                                                                                                                                                                                                                                                                                                                                                                                                                                                                                                                    | 269                        | 19                           |                                      |
| Secondary definition of Covid -19                                                                                                                                                                                                                                                                                                                                                                                                                                                                                                                                                                                                                                                                                                                                                                                                                                                                                                                                                                                                                                                                                                                                            | 24                         | 1                            |                                      |
| Positive RT-PCR at scheduled pre-dose 2*                                                                                                                                                                                                                                                                                                                                                                                                                                                                                                                                                                                                                                                                                                                                                                                                                                                                                                                                                                                                                                                                                                                                     | 39                         | 15                           |                                      |
| Total infection (symptomatic or RT-PCR+ at pre-dose 2)                                                                                                                                                                                                                                                                                                                                                                                                                                                                                                                                                                                                                                                                                                                                                                                                                                                                                                                                                                                                                                                                                                                       | 332                        | 35                           | 89.6%<br>(85.2%-92.6%) <sup>†</sup>  |
| Person-years <sup>‡</sup>                                                                                                                                                                                                                                                                                                                                                                                                                                                                                                                                                                                                                                                                                                                                                                                                                                                                                                                                                                                                                                                                                                                                                    | 3365.6                     | 3386.6                       |                                      |
| Incidence rate (95% CI) <sup>§</sup>                                                                                                                                                                                                                                                                                                                                                                                                                                                                                                                                                                                                                                                                                                                                                                                                                                                                                                                                                                                                                                                                                                                                         | 98.6<br>(88.3-109.8)       | 10.3<br>(7.2-14.4)           | 89.5%<br>(85.1%-92.8%)               |
| <p>Preliminary analysis of infection from randomization performed based on the modified intent-to-treat set (data cut-off November 25, 2020). Infection was defined as symptomatic Covid-19, either Covid-19 (positive RT-PCR with two eligible systemic or one eligible respiratory symptom), or secondary/CDC definition of Covid-19 requiring one symptom, or, asymptomatic infection, as measured by positive RT-PCR at the scheduled pre-Dose 2 visit.). <sup>†</sup>Positive RT-PCR at the scheduled pre-Dose 2 visit and no Covid-19 symptoms. <sup>†</sup>From stratified Cox proportional model adjusting for the stratification factor. <sup>‡</sup>Person-years defined as the total years from randomization date to the date of Covid-19, last date of study participation, or efficacy data cutoff date, whichever was earlier. <sup>§</sup>Incidence rate was defined as the number of participants with an event divided by the number at risk adjusted by person-years (total time at risk) in each treatment group and 95% CI calculated using the exact method (Poisson distribution) conditional on total number of events adjusted by person-years.</p> |                            |                              |                                      |
