# Supplementary material
Source: PubMed Central journal article supplement (PMC7787219)
Supplement: NEJMoa2035389_data-sharing.pdf [file NEJMoa2035389_data-sharing.pdf]

## Data Sharing Statement

Baden LR, El Sahly HM, Essink B, et al. Efficacy and Safety of the mRNA-1273 SARS-CoV-2 Vaccine. *N Engl J Med*. DOI: 10.1056/NEJMoa2035389.

| Question                                                            | Authors' Response                                                                                                                                                                                                                |
|---------------------------------------------------------------------|----------------------------------------------------------------------------------------------------------------------------------------------------------------------------------------------------------------------------------|
| Will the data collected for your study be made available to others? | No                                                                                                                                                                                                                               |
| Would you like to offer context for your decision?                  | The results of this study are preliminary and the study is ongoing. Access to patient-level data and supporting clinical documents with qualified external researchers may be available upon request once the trial is complete. |
| Which data?                                                         | —                                                                                                                                                                                                                                |
| Additional information about data                                   | —                                                                                                                                                                                                                                |
| How or where can the data be obtained?                              | —                                                                                                                                                                                                                                |
| When will data availability begin?                                  | —                                                                                                                                                                                                                                |
| When will data availability end?                                    | —                                                                                                                                                                                                                                |
| Will any supporting documents be available?                         | —                                                                                                                                                                                                                                |
| Which supporting documents?                                         | —                                                                                                                                                                                                                                |
| Additional information about supporting documents                   | —                                                                                                                                                                                                                                |
| How or where can supporting documents be obtained?                  | —                                                                                                                                                                                                                                |
| When will supporting documents availability begin?                  | —                                                                                                                                                                                                                                |
| When will supporting documents availability end?                    | —                                                                                                                                                                                                                                |
| To whom will data be available?                                     | —                                                                                                                                                                                                                                |
| For what type of analysis or purpose?                               | —                                                                                                                                                                                                                                |
| By what mechanism?                                                  | —                                                                                                                                                                                                                                |
| Any other restrictions?                                             | —                                                                                                                                                                                                                                |
| Additional information                                              | —                                                                                                                                                                                                                                |

This statement was posted on December 30, 2020, at NEJM.org.
